# Supplementary material for: A Perspective on the Role of Eco-Certification in Eliminating Illegal, Unreported and Unregulated Fishing
Source: Frontiers journal article supplement (doi:10.3389/fevo.2021.637228), 2021-08-09
Supplement: Table_1.XLSX [file Table_1.XLSX]

## Sheet: IUUrelated_conds_examples
Table S1: Example fishery certificate 'conditions' (i.e., indicators scoring at least 60 but needing to make improvements to reach 80) requiring actions that address an aspect of Illegal, Unregulated or Unreported fishing. Condition actions reported in Fishery Public Certificate Reports are divided into four categories of improvements relevant to addressing IUU issues, using qualitative content a…
				Examples of IUU-related conditions
			Relevant aspects of IUU fishing	Illegal	Unreported	Unregulated	Unreported, Unregulated
			Rationale for defining the category	"Illegal" practices are out of scope for MSC certification, however improved knowledge of illegal catches of other operators may be required to ensure appropriate management advice	Demonstrating there are no "Unreported" activities in certified fisheries may result in conditions on strengthened monitoring or reporting systems - here we only included those for which the reporting is legally mandated	Completely "Unregulated" fishing would fail too many requirements to pass the Fishery certification audit, though improvements may be requested around transparency and inclusivity in decision-making, strengthening the management system's accountability, social license, and fishery participants' culture of compliance	Demonstrating there are no "Unreported" or "Unregulated" activities, and there is effective enforcement of regulations in certified fisheries may result in conditions on strengthening Monitoring, Control and Surveillance systems
			Search terms used to identify conditions likely to belong to this category	"illegal", "IUU"	"reporting", "reported", "unreported"	"transparent", "transparency"	"MCS"
			Definition of the category	(Estimation of illegal catch for the whole stock is available & considered in the resource status assessment or Harvest Control Rules (HCRs))	(Data are collected on catches or encounter rates for species that are legally required to be monitored, including Endangered Threated & Protected species (ETP))	(The evidence used to decide reference points and/or stock assessment advice is documented & available; or the process for decision-making is transparent)	(Monitoring, Control and Surveillance (MCS) of fishing activities on target, accessory or incidental catch is in place and effective)
MSC Fishery Standard component				Illegal catch estimates	Reporting	Transparent decision-making	MCS
Principle (P)	Performance Indicator (PI)	Performance Indicator (PI) name
P1	1.2.2	Harvest Control Rules & Tools		"Managers estimate the level of IUU catch by applying a correction factor to the official catch statistics [...] but the transparency of their analysis is not obvious." - Condition Rationale
	1.2.3	Information/ Monitoring		"provide a detailed plan for assessing the magnitude of illegal fishing in the Bolshaya River drainage" - 1st Surveillance Milestone	"catch returns from the permit scheme are not spatially disaggregated, and therefore it is not possible to obtain early warning signals of local depletion from the permit returns." - Condition Rationale
	1.2.4	Assessment of Stock Status		Design a scientifically valid approach to determine the sources and amounts of pikeperch mortality associated with recreational and IUU fishing in Lake Peipus (including of juvenile by-catch and discarding) in the summer trapnet fishery 1st Surveillance Milestone		"a comprehensive report is needed to document 1) catch and escapement statistics used to develop reference points, 2) total catch mortalities including chum salmon discard estimates that incorporate adjustments for under-reporting in logbooks" - Condition Rationale
P2	2.1.2	Retained species - Management		"There is an uncertain amount of IUU activity occurring in the [Argentine squid] fishery [used as bait]" Rationale; "Develop a project plan to investigate alternate bait sources with the same efficacy as Argentine Squid" 1st Surveillance Milestone	"need to improve data accuracy between fishery reporting and estimation of bycatch [of blue shark] by observers to provide an objective basis for confidence." Rationale; " Blue shark caught in this fishery will be all released as default practice, and we will report accurate release data on annual surveillance." 4th Surveillance Milestone
	2.1.3	Retained species - Information		"The Client should develop a monitoring and/or research program to determine amounts roach, bream and Prussian carp caught in trap nets" 1st Surveillance Milestone	"While logbooks and dockside information continue to be collected the sample size of IFOP monitoring of the fishery in the northern area is low [...] By the third annual surveillance audit [...] Information should be sufficient to estimate outcome status with respect to biologically based limits of cardinal fish, in particular with respect to discards" Condition Rationale		"Implement monitoring program designed in Year 1. Collect data for IUU and recreational fishing, juvenile by-catch, and catch compostion in trap nets." Year 2 of the Action Plan
	2.2.1	Secondary species - outcome					"will work with CEFAS and vessels to design and implement an appropriate discard monitoring programme for the fishery. CFPO will test and implement new management measures, if necessary, to mitigate impacts of the fishery on spurdogs." Years 3-4 of the Action Plan
	2.2.2	Bycatch species - Management			"Observer record provided through SPC to WPSTA with assistance of TFA clearly demonstrates that there is highly unlikely the shark finning is taking place in UoC Taiwan fleets for year 2018" 2nd Surveillance Milestone
	2.2.3	Bycatch species - Information			"By the end of Year 2 there shall be evidence that some quantitative information on of seabird bycatch is both available and adequate to assess the impact of the UoA on main secondary species with respect to their status" 2nd Surveillance Milestone
	2.3.1	ETP species - Outcome			"the CAB will be presented with evidence that the combined effect of the MSC UoAs on the NARW [North Atlantic Right Wale] population are highly likely to be within national limits" 4th Surveillance Milestone
	2.3.2	ETP species - Management			"Provide evidence that […] management measures align with the estimated impacts of the fishery relative to the PBR for marine mammals with which the fishery interacts" 4th Surveillance Milestone
	2.3.3	ETP species - Information			"There are no records of ETP mortality in the fishery and none likely to exist. However, [...] By the third annual surveillance, a template for recording ETP interactions should be implemented within the fishery allowing the management authority to monitor fishery impacts." Rationale		"Show written evidence of consultation with permit holders to agree that any interaction with ETP species should be recorded and passed on to management authorities for analysis."
P3	3.1.1	Legal and/or customary framework				"There should also be evidence of an effective and transparent mechanism for dispute resolution between the parties." Rationale; "Communication should be begun or continued with relevant parties to promote cooperation on delivery of outcomes consistent with meeting the requirements of Principle 1 and achieving a suitable means of dispute resolution" 1st Surveillance Milestone	"Chinese Taipei can show an effective national system to deliver effective measures and control over the distant water fishing vessels, consistent with the requirements of PI 3.1.1a, SG80. Cooperation with RFMO on scientific contribution by submission of all required fishing operational data is demonstrated." Condition Rationale
	3.1.2	Consultation, Roles & Responsiblities				"undertake improvement in prescribing process for multi-stakeholder efforts in the tuna technical advisory consultative committee setup and their full participation in regards to any program or activity that aims to improve the management and development of the tuna fisheries" 1st Surveillance Milestone
	3.2.2	Decision Making Processes				"Some evidence that the Commission is responding to the issue of SP albacore catch rates, e.g. by progressing with the harvest strategy as per the agreed workplan, or some other evidence" 1st Surveillance Milestone
	3.2.3	Compliance & Enforcement					"A protocol that clearly details the guardapesca's roles and responsibilities is ready and multi-stakeholder discussions on how to include it in the management system has started. A set of possible solutions regarding the issue of non-compliance with the regulation limiting the maximum number of traps per vessel has been proposed for its discussion and assessment. Evidences that enforcement capac…
