# Supplementary material for: A Perspective on the Role of Eco-Certification in Eliminating Illegal, Unreported and Unregulated Fishing
Source: Frontiers journal article supplement (doi:10.3389/fevo.2021.637228), 2021-08-09
Supplement: Table_2.XLSX [file Table_2.XLSX]

## Sheet: Table_S2
Table S2: Dataset used to identify the examples in table S1 and identify relevant Performance Indicators in Table 1 (i.e., elements of the Fishery Standard that have direct effects on improving IUU-related practices). Data were compiled up to December 2020 in an database maintained by MSC, extracting information from public MSC fishery certificate reports. All text fields were copied from origina…
Current_fishery_name	Fisherystatus_current	Event_name	Tree_name	PI	Condition_name	StockName	ISSCAAP	Gear	Other_denominator	Rationale	Plan	Milestones	Conditionstatus_current	Cond_category
Bratsk Reservoir perch	Certified	Bratsk Reservoir perch	Default Tree v2.0	1.2.2	Condition 2: Harvest Control Rules & Tools	European Perch - 07, Bratsk Reservoir	Miscellaneous freshwater fishes	Traps - Stationary uncovered pound nets	Bratsk Reservoir perch	Rationale _x000D_ HCRs are well defined and in place to ensure the target stock (perch) stays above the point of recruitment impairment (PRI) and fluctuates around levels of Maximum Sustainable Yield (MSY). Specific HCRs include annual levels of Recommended Allowable Catch (RAC) and stop fishing rules when harvest reaches 70 % of this amount. Other HCRs involve quotas_x000D_ assigned to individua…	Year 1 :_x000D_ Sign a contract with Gosrybtsentr to manage monitoring for Condition 2._x000D_ Design a monitoring program to account for all sources of fish mortality to support Harvest Control Rules (HCRs)._x000D_ Collect data for:_x000D_ a) Recreational fishing : Conduct a sampling program to estimate the level of recreational fishing based on_x000D_ questionnaires received from recreational f…	Milestones:_x000D_ Surveillance 1: The Client should design a monitoring program to identify uncertaintiesrelated to fish mortalities in the reservoir. It should consider the amounts of recreational and IUU fishing, juvenile by-catch and significant sources of non-fishing mortality. The monitoiring strategy should include activities to evaluate perch juvenile by-catch as described in_x000D_ Condt…	Closed	illegal
Lake Peipus perch and pike-perch	Certified	Lake Peipus perch and pike-perch	Default Tree v2.0	1.2.2	Condition 1: Perch Harvest contol rules & tools	European perch - 05, Lake Peipus	Miscellaneous freshwater fishes	Gillnets And Entangling Nets - Gillnets	Perch	Rationale The management system accounts for some uncertainty when setting HCRs. For example, managers estimate the magnitude of mortality from recreational and IUU fishing, and include the estimates in the stock assessment and in the process of allocating the TAC and quotas. However there remain some uncertainties about how managers estimate actual values for recreational and IUU fishing, and fo…	Client action plan _x000D_ _x000D_ Year 1. _x000D_ The Client, in consultations with Estonian Fishery Inspectorate, Ministry of Environment, Ministry of Rural Affairs and Estonian Marine Institute, will develop a plan of survey aiming to describe patterns and magnitude of illegal fishing in Peipus Lake, including discards of juvenile perch. The latest question will be addressed in detail by the E…	Milestones _x000D_ _x000D_ Please note: Milestones here are similar or the same as those for Condition 2. _x000D_ _x000D_ Year 1: _x000D_ - Design a scientifically valid approach to determine the sources and amounts of perch mortality associated with recreational and IUU fishing in Lake Peipus (including of juvenile by-catch and discarding) that will aid in meeting the SG80 requirement for this S…	Open	illegal
Bratsk Reservoir perch	Certified	Bratsk Reservoir perch	Default Tree v2.0	2.1.3	Condition 6: Retained Species Information	European Perch - 07, Bratsk Reservoir	Miscellaneous freshwater fishes	Traps - Stationary uncovered pound nets	Bratsk Reservoir perch	Rationale:_x000D_ Information about primary main species comes from fishing logbooks. It describes:_x000D_ â€¢ Amount of catch_x000D_ â€¢ Fishing effort_x000D_ â€¢ Location of fishing_x000D_ â€¢ Catch by species for combined gear types (trap nets, gill nets, and beach seines)._x000D_ However there are few data to estimate unwanted catch of juvenile species as described in Condtion 5 and few data …	Year 1: Design a monitoring program to provide trap net catch information for primary main species (bream, roach, and Prussian carp). Combine similar data needs for Conditions, 1, 2, 3 and 5 into an integrated monitoring program. Collect data for: a) catch compostion in trap nets and catch amounts of primary main species (bream, roach, and Prussian carp); b) recreational catch of bream, roach, an…	Surveillance 1: The Client should develop a monitoring and/or research program to determine amounts roach, bream and Prussian carp caught in trap nets. The monitoring program should both determine the amounts of juvenile by-catch and evaluate effective and practical measures to reduce it. Prepare Year 1 Report describing monitoring program to and promising alternative measures to reduce mortality…	Closed	MCS
Bratsk Reservoir perch	Certified	Bratsk Reservoir perch	Default Tree v2.0	1.2.3	Condition 3: Information and Monitoring	European Perch - 07, Bratsk Reservoir	Miscellaneous freshwater fishes	Traps - Stationary uncovered pound nets	Bratsk Reservoir perch	Rationale:_x000D_ There is good information on fishery removals from the commercial fishery. However, as described in Condition 2, there are data gaps related to fish mortalities associated with recreational and IUU fishing and juvenile by-catch. Moreover, the assessment team found_x000D_ no catch data for trap nets only, the UoA. Rather, available fishery data present aggregated catches for all …	Year 1:_x000D_ Design a monitoring program to determine catch compostion in trap nets. The program will include an fishery-indpendent field survey combined with information collected from commercial fishermen._x000D_ _x000D_ Gostrybcentr will establish a network of survey trap nets and design monitoring protocols that specify sampling locations, methods, times, and_x000D_ frequencies._x000D_ _x00…	Milestones:_x000D_ Surveillance 1: The Client should design a monitoring program to determine the amount of perch caught from trap nets only. It should be part of an integrated monitoring program that also collects data about IUU and recreational fishing, and juvenile by-catch. Prepare Year 1 report describing monitoring program._x000D_ Surveillance 2: The Client should implement the monitoring p…	Open	reporting
The Bahamas Spiny Lobster Fishery	Certified	The Bahamas Spiny Lobster Fishery	Default Tree v2.0	1.2.3	Condition 1: Harvest strategy	Caribbean spiny lobster-West Altantic, Mexico	Lobsters, spiny-rock lobsters	Miscellaneous Gear	Spiny lobster - condos	1.2.3c: There is good information on all other fishery removals from the stock. _x000D_ _x000D_ There are many potential fishermen providing lobsters for subsistence / to local markets that are unreported. Furthermore, foreign IUU is a problem, as noted above and estimated increases in Dominican landings in 2011 that were suspected of originating from The Bahamas would prevent effective implement…	Year 1: Department of Marine Resources (DMR) to evaluate all current sources of information concerning IUU fishing amounts in The Bahamas including the recent DMR arrest reports, independent research projects recently conducted and consumption surveys (to target local market landings and subsistence fishing information). DMR to then design research projects aimed at filling gaps in information re…	By the Year 1 audit, a research process would have been developed that is capable of estimating removals from foreign IUU and from unreported Bahamian fishing within the fishery. Score: 75 _x000D_ _x000D_ By the Year 2 audit, the process will have been initiated, with data collection in process. Score: 75 _x000D_ _x000D_ At the Year 3 audit, the initial results will be presented to demonstrate pr…	Open	illegal
The Bahamas Spiny Lobster Fishery	Certified	The Bahamas Spiny Lobster Fishery	Default Tree v2.0	1.2.3	Condition 1: Harvest strategy	Caribbean spiny lobster-West Altantic, Mexico	Lobsters, spiny-rock lobsters	Traps - Pots	Spiny lobster - lobster traps	1.2.3c: There is good information on all other fishery removals from the stock. _x000D_ _x000D_ There are many potential fishermen providing lobsters for subsistence / to local markets that are unreported. Furthermore, foreign IUU is a problem, as noted above and estimated increases in Dominican landings in 2011 that were suspected of originating from The Bahamas would prevent effective implement…	Year 1: Department of Marine Resources (DMR) to evaluate all current sources of information concerning IUU fishing amounts in The Bahamas including the recent DMR arrest reports, independent research projects recently conducted and consumption surveys (to target local market landings and subsistence fishing information). DMR to then design research projects aimed at filling gaps in information re…	By the Year 1 audit, a research process would have been developed that is capable of estimating removals from foreign IUU and from unreported Bahamian fishing within the fishery. Score: 75 _x000D_ _x000D_ By the Year 2 audit, the process will have been initiated, with data collection in process. Score: 75 _x000D_ _x000D_ At the Year 3 audit, the initial results will be presented to demonstrate pr…	Open	illegal
WPSTA Western and Central Pacific skipjack and yellowfin free school purse seine	Certified	WPSTA Western and Central Pacific skipjack and yellowfin free school purse seine	Default Tree v2.0	3.1.1	Condition 7: Legal and/or customary framework	Yellowfin tuna Central Western Pacific	Tunas, bonitos, billfishes	Surrounding Nets - With purse lines (purse seines)	Yellowfin, China - purse seine, free School (unassociated) sets only	Regional _x000D_ At the regional level, as described by Banks et al. (2011), Medley and Powers (2015) and Morison and McLoughlin (2016), the WCPFC Convention, the Nauru Agreement, relevant coastal fisheries laws and national tuna management plans are consistent with the provisions of UNCLOS and UNFSA. _x000D_ UNCLOS makes specific provisions for straddling stocks and highly migratory fish stock i…	General approach: _x000D_ The concrete issue identified by the CAB is lack of documentation/methods indicating how China intends to undertake its cooperative responsibilities, enforcement and controls on vessels fishing in the WCPFC Convention Area. _x000D_ _x000D_ In relation to enforcement, control and monitoring, at the national level, the CAP will rely on the implementation of the 13th 5-year…	Year 1 (2019) Evidence is available to demonstrate that implementation of the 13th 5-years National Offshore Fisheries Development Plan has started. Evaluation report on potential cause of gaps in compliance with WCPFC CMMs as noted by WCPFC CMR, for the Chinese-flagged high seas purse seine fishery, generated by WPSTA alone or with authorities. Score 75. _x000D_ _x000D_ Year 2 (2020): China has …	Open	MCS
WPSTA Western and Central Pacific skipjack and yellowfin free school purse seine	Certified	WPSTA Western and Central Pacific skipjack and yellowfin free school purse seine	Default Tree v2.0	3.1.1	Condition 7: Legal and/or customary framework	Skipjack tuna Central Western Pacific	Tunas, bonitos, billfishes	Surrounding Nets - With purse lines (purse seines)	Skipjack, China - purse seine, free School (or unassociated) sets only	Regional _x000D_ At the regional level, as described by Banks et al. (2011), Medley and Powers (2015) and Morison and McLoughlin (2016), the WCPFC Convention, the Nauru Agreement, relevant coastal fisheries laws and national tuna management plans are consistent with the provisions of UNCLOS and UNFSA. _x000D_ UNCLOS makes specific provisions for straddling stocks and highly migratory fish stock i…	General approach: _x000D_ The concrete issue identified by the CAB is lack of documentation/methods indicating how China intends to undertake its cooperative responsibilities, enforcement and controls on vessels fishing in the WCPFC Convention Area. _x000D_ _x000D_ In relation to enforcement, control and monitoring, at the national level, the CAP will rely on the implementation of the 13th 5-year…	Year 1 (2019) Evidence is available to demonstrate that implementation of the 13th 5-years National Offshore Fisheries Development Plan has started. Evaluation report on potential cause of gaps in compliance with WCPFC CMMs as noted by WCPFC CMR, for the Chinese-flagged high seas purse seine fishery, generated by WPSTA alone or with authorities. Score 75. _x000D_ _x000D_ Year 2 (2020): China has …	Open	MCS
WPSTA Western and Central Pacific skipjack and yellowfin free school purse seine	Certified	WPSTA Western and Central Pacific skipjack and yellowfin free school purse seine	Default Tree v2.0	3.1.1	Condition 8: Legal and/or customary framework	Skipjack tuna Central Western Pacific	Tunas, bonitos, billfishes	Surrounding Nets - With purse lines (purse seines)	Skipjack, Chinese Taipei - purse seine, free School (unassociated) sets only	Regional _x000D_ At the regional level, as described by Banks et al. (2011), Medley and Powers (2015) and Morison and McLoughlin (2016), the WCPFC Convention, the Nauru Agreement, relevant coastal fisheries laws and national tuna management plans are consistent with the provisions of UNCLOS and UNFSA. _x000D_ UNCLOS makes specific provisions for straddling stocks and highly migratory fish stock i…	General approach: The concrete issues identified by the CAB are as follows: i) lack of operation catch/effort data; and ii) lack of evidence of flag state enforcement and controls on vessels fishing in the WCPFC Convention Area. _x000D_ _x000D_ Williams (2017) notes that for the first time in 2017, Taiwan provided some (although not full) operational level catch-effort data to the Commission, on …	Year 1 (2019): Barriers to the provision of operational level data have been removed. Evidence that the implementation of the NPCI has started. Score: 75 _x000D_ _x000D_ Year 2 (2020): Chinese Taipei has been providing operational-level data to WCPFC for 2nd year as set out in CMMs and other formal requirements. Coverage of the operational data is improved. TFA has been implementing the NPCI for …	Closed	MCS
WPSTA Western and Central Pacific skipjack and yellowfin free school purse seine	Certified	WPSTA Western and Central Pacific skipjack and yellowfin free school purse seine	Default Tree v2.0	3.1.1	Condition 8: Legal and/or customary framework	Yellowfin tuna Central Western Pacific	Tunas, bonitos, billfishes	Surrounding Nets - With purse lines (purse seines)	Yellowfin, China Taipei - purse seine, free School (unassociated) sets only	Regional _x000D_ At the regional level, as described by Banks et al. (2011), Medley and Powers (2015) and Morison and McLoughlin (2016), the WCPFC Convention, the Nauru Agreement, relevant coastal fisheries laws and national tuna management plans are consistent with the provisions of UNCLOS and UNFSA. _x000D_ UNCLOS makes specific provisions for straddling stocks and highly migratory fish stock i…	General approach: The concrete issues identified by the CAB are as follows: i) lack of operation catch/effort data; and ii) lack of evidence of flag state enforcement and controls on vessels fishing in the WCPFC Convention Area. _x000D_ _x000D_ Williams (2017) notes that for the first time in 2017, Taiwan provided some (although not full) operational level catch-effort data to the Commission, on …	Year 1 (2019): Barriers to the provision of operational level data have been removed. Evidence that the implementation of the NPCI has started. Score: 75 _x000D_ _x000D_ Year 2 (2020): Chinese Taipei has been providing operational-level data to WCPFC for 2nd year as set out in CMMs and other formal requirements. Coverage of the operational data is improved. TFA has been implementing the NPCI for …	Closed	MCS
WPSTA Western and Central Pacific skipjack and yellowfin free school purse seine	Certified	WPSTA Western and Central Pacific skipjack and yellowfin free school purse seine	Default Tree v2.0	3.1.2	Condition 9: Consultation, roles and responsibilities	Yellowfin tuna Central Western Pacific	Tunas, bonitos, billfishes	Surrounding Nets - With purse lines (purse seines)	Yellowfin, China - purse seine, free School (unassociated) sets only	Regional _x000D_ At the regional level, as described by Banks et al. (2011), Medley and Powers (2015) and Morison and McLoughlin (2016), the WCPFC Convention, the Nauru Agreement, relevant coastal fisheries laws and national tuna management plans are consistent with the provisions of UNCLOS and UNFSA. _x000D_ UNCLOS makes specific provisions for straddling stocks and highly migratory fish stock i…	General approach: _x000D_ The approach to addressing this condition will be firstly to provide documentary evidence as to existing structures for consultation and relevant record that demonstrates the consideration of the information obtained by Authority for both input to national and regional management arrangements. We will then request the CAB to evaluate this evidence at the first surveillan…	Year 1 (2019): Existing consultation structures and procedures are documented to demonstrate they regularly seek and regularly accept relevant information. Evidence provided will allow the CAB to evaluate of the frequency, means to access, types of mechanisms and procedural clarity of mechanisms for input into national and international measures relevant to any pertinent Acts and the vessels in q…	Open	transparent
WPSTA Western and Central Pacific skipjack and yellowfin free school purse seine	Certified	WPSTA Western and Central Pacific skipjack and yellowfin free school purse seine	Default Tree v2.0	3.1.2	Condition 9: Consultation, roles and responsibilities	Skipjack tuna Central Western Pacific	Tunas, bonitos, billfishes	Surrounding Nets - With purse lines (purse seines)	Skipjack, China - purse seine, free School (or unassociated) sets only	Regional _x000D_ At the regional level, as described by Banks et al. (2011), Medley and Powers (2015) and Morison and McLoughlin (2016), the WCPFC Convention, the Nauru Agreement, relevant coastal fisheries laws and national tuna management plans are consistent with the provisions of UNCLOS and UNFSA. _x000D_ UNCLOS makes specific provisions for straddling stocks and highly migratory fish stock i…	General approach: _x000D_ The approach to addressing this condition will be firstly to provide documentary evidence as to existing structures for consultation and relevant record that demonstrates the consideration of the information obtained by Authority for both input to national and regional management arrangements. We will then request the CAB to evaluate this evidence at the first surveillan…	Year 1 (2019): Existing consultation structures and procedures are documented to demonstrate they regularly seek and regularly accept relevant information. Evidence provided will allow the CAB to evaluate of the frequency, means to access, types of mechanisms and procedural clarity of mechanisms for input into national and international measures relevant to any pertinent Acts and the vessels in q…	Open	transparent
WPSTA Western and Central Pacific skipjack and yellowfin free school purse seine	Certified	WPSTA Western and Central Pacific skipjack and yellowfin free school purse seine	Default Tree v2.0	3.2.3	Condition 13: Compliance and enforcement	Yellowfin tuna Central Western Pacific	Tunas, bonitos, billfishes	Surrounding Nets - With purse lines (purse seines)	Yellowfin, China - purse seine, free School (unassociated) sets only	In relation to this Scoring Issue, the primary focus is the PNA and the flag States. While the WCPFC develops and implements (via Members) management and MCS arrangements, it has few if any, sanctions available to it should flag States or vessels/companies fail to abide by CMMs. The WCPFC does provide some reporting on compliance performance that could provide evidence on consistent application o…	General approach _x000D_ The Action Plan for Condition 7 considers the legal system to provide necessary cooperation and management outcomes consistent with MSC principles 1 and 2, this includes having an effective enforcement system and appropriate sanctions. The flag State/management agency also needs to be able to demonstrate that these sanctions are consistently applied and provide effective …	Year 1 (2019): Evidence that can be used to track progress against these metrics are identified by WPSTA/authorities, with associated reasoning for why such metrics will be reliable and transparent. Score: 75 _x000D_ _x000D_ Year 2 (2020): WPSTA receives evidence from Bureau of Fisheries that allows the CAB to evaluate demonstrable improvement in enforcement in problem areas, using relevant metri…	Open	MCS
WPSTA Western and Central Pacific skipjack and yellowfin free school purse seine	Certified	WPSTA Western and Central Pacific skipjack and yellowfin free school purse seine	Default Tree v2.0	3.2.3	Condition 13: Compliance and enforcement	Skipjack tuna Central Western Pacific	Tunas, bonitos, billfishes	Surrounding Nets - With purse lines (purse seines)	Skipjack, China - purse seine, free School (or unassociated) sets only	In relation to this Scoring Issue, the primary focus is the PNA and the flag States. While the WCPFC develops and implements (via Members) management and MCS arrangements, it has few if any, sanctions available to it should flag States or vessels/companies fail to abide by CMMs. The WCPFC does provide some reporting on compliance performance that could provide evidence on consistent application o…	General approach _x000D_ The Action Plan for Condition 7 considers the legal system to provide necessary cooperation and management outcomes consistent with MSC principles 1 and 2, this includes having an effective enforcement system and appropriate sanctions. The flag State/management agency also needs to be able to demonstrate that these sanctions are consistently applied and provide effective …	Year 1 (2019): Evidence that can be used to track progress against these metrics are identified by WPSTA/authorities, with associated reasoning for why such metrics will be reliable and transparent. Score: 75 _x000D_ _x000D_ Year 2 (2020): WPSTA receives evidence from Bureau of Fisheries that allows the CAB to evaluate demonstrable improvement in enforcement in problem areas, using relevant metri…	Open	MCS
WPSTA Western and Central Pacific skipjack and yellowfin free school purse seine	Certified	WPSTA Western and Central Pacific skipjack and yellowfin free school purse seine	Default Tree v2.0	3.2.3	Condition 14: Compliance and enforcement	Skipjack tuna Central Western Pacific	Tunas, bonitos, billfishes	Surrounding Nets - With purse lines (purse seines)	Skipjack, Chinese Taipei - purse seine, free School (unassociated) sets only	In relation to this Scoring Issue, the primary focus is the PNA and the flag States. While the WCPFC develops and implements (via Members) management and MCS arrangements, it has few if any, sanctions available to it should flag States or vessels/companies fail to abide by CMMs. The WCPFC does provide some reporting on compliance performance that could provide evidence on consistent application o…	General approach _x000D_ The Action Plan for Condition 8 (on 3.1.1a) considers the legal system to provide necessary cooperation and management outcomes consistent with MSC principles 1 and 2, this includes having an effective enforcement system and appropriate sanctions. The flag State/management agency needs to be able to demonstrate that these sanctions are consistently applied and provide eff…	Year 1 (2019): Evidence that can be used to track progress against these metrics are identified by WPSTA/authorities, with associated reasoning for why such metrics will be reliable and transparent. Score: 75 _x000D_ _x000D_ Year 2 (2020): WPSTA receives evidence from TFA that allows the CAB to evaluate demonstrable improvement in enforcement in problem areas, using relevant metrics. Score: 75 _x…	Open	MCS
WPSTA Western and Central Pacific skipjack and yellowfin free school purse seine	Certified	WPSTA Western and Central Pacific skipjack and yellowfin free school purse seine	Default Tree v2.0	3.2.3	Condition 14: Compliance and enforcement	Yellowfin tuna Central Western Pacific	Tunas, bonitos, billfishes	Surrounding Nets - With purse lines (purse seines)	Yellowfin, China Taipei - purse seine, free School (unassociated) sets only	In relation to this Scoring Issue, the primary focus is the PNA and the flag States. While the WCPFC develops and implements (via Members) management and MCS arrangements, it has few if any, sanctions available to it should flag States or vessels/companies fail to abide by CMMs. The WCPFC does provide some reporting on compliance performance that could provide evidence on consistent application o…	General approach _x000D_ The Action Plan for Condition 8 (on 3.1.1a) considers the legal system to provide necessary cooperation and management outcomes consistent with MSC principles 1 and 2, this includes having an effective enforcement system and appropriate sanctions. The flag State/management agency needs to be able to demonstrate that these sanctions are consistently applied and provide eff…	Year 1 (2019): Evidence that can be used to track progress against these metrics are identified by WPSTA/authorities, with associated reasoning for why such metrics will be reliable and transparent. Score: 75 _x000D_ _x000D_ Year 2 (2020): WPSTA receives evidence from TFA that allows the CAB to evaluate demonstrable improvement in enforcement in problem areas, using relevant metrics. Score: 75 _x…	Open	MCS
Narody Severa Bolsheretsk salmon	Certified	Narody Severa Bolsheretsk salmon	Default Tree v2.0 [Salmon]	1.2.3	Condition 2: Harvest strategy information and monitoring	Pink Salmon - 61, Western Kamchatka	Salmons, trouts, smelts	Gillnets And Entangling Nets - Gillnets	Pink salmon - gillnets	While illegal harvest has been substantially reduced from historical levels and current levels are constrained by the remoteness of the area, illegal harvest remains a chronic problem in the Bolshaya River. Therefore, this standard is not met._x000D_ _x000D_ Provide information on the level illegal fishery removals of Pink and Chum Salmon from the Bolshaya River.	The Client will provide a detailed plan for assessing the magnitude of illegal fishing in the Bolshaya River drainage by the first surveillance audit. In addition, to documenting enforcement activities, and media reports, the plan will include some methodology to quantify the amount of fish illegally harvested. For example, this may include reinstating/modifying KamchatNIRO studies to quantify il…	By the first annual surveillance, the client must present evidence that a plan is in place to address this condition. _x000D_ By the second annual surveillance, the client must present evidence that the plan has been implemented. _x000D_ By the third annual surveillance, the client must demonstrate that the condition has been met, at which time the fishery will rescore at least 80. _x000D_ Recomm…	Open	illegal
Narody Severa Bolsheretsk salmon	Certified	Narody Severa Bolsheretsk salmon	Default Tree v2.0 [Salmon]	1.2.3	Condition 2: Harvest strategy information and monitoring	Pink Salmon - 61, Western Kamchatka	Salmons, trouts, smelts	Seine Nets - Beach seines	Pink salmon - beach seine	While illegal harvest has been substantially reduced from historical levels and current levels are constrained by the remoteness of the area, illegal harvest remains a chronic problem in the Bolshaya River. Therefore, this standard is not met._x000D_ _x000D_ Provide information on the level illegal fishery removals of Pink and Chum Salmon from the Bolshaya River.	The Client will provide a detailed plan for assessing the magnitude of illegal fishing in the Bolshaya River drainage by the first surveillance audit. In addition, to documenting enforcement activities, and media reports, the plan will include some methodology to quantify the amount of fish illegally harvested. For example, this may include reinstating/modifying KamchatNIRO studies to quantify il…	By the first annual surveillance, the client must present evidence that a plan is in place to address this condition. _x000D_ By the second annual surveillance, the client must present evidence that the plan has been implemented. _x000D_ By the third annual surveillance, the client must demonstrate that the condition has been met, at which time the fishery will rescore at least 80. _x000D_ Recomm…	Open	illegal
Narody Severa Bolsheretsk salmon	Certified	Narody Severa Bolsheretsk salmon	Default Tree v2.0 [Salmon]	1.2.3	Condition 2: Harvest strategy information and monitoring	Pink Salmon - 61, Western Kamchatka	Salmons, trouts, smelts	Traps - Stow nets	Pink salmon - coastal trap nets	While illegal harvest has been substantially reduced from historical levels and current levels are constrained by the remoteness of the area, illegal harvest remains a chronic problem in the Bolshaya River. Therefore, this standard is not met._x000D_ _x000D_ Provide information on the level illegal fishery removals of Pink and Chum Salmon from the Bolshaya River.	The Client will provide a detailed plan for assessing the magnitude of illegal fishing in the Bolshaya River drainage by the first surveillance audit. In addition, to documenting enforcement activities, and media reports, the plan will include some methodology to quantify the amount of fish illegally harvested. For example, this may include reinstating/modifying KamchatNIRO studies to quantify il…	By the first annual surveillance, the client must present evidence that a plan is in place to address this condition. _x000D_ By the second annual surveillance, the client must present evidence that the plan has been implemented. _x000D_ By the third annual surveillance, the client must demonstrate that the condition has been met, at which time the fishery will rescore at least 80. _x000D_ Recomm…	Open	illegal
Narody Severa Bolsheretsk salmon	Certified	Narody Severa Bolsheretsk salmon	Default Tree v2.0 [Salmon]	1.2.3	Condition 2: Harvest strategy information and monitoring	Chum Salmon - 61, Western Kamchatka	Salmons, trouts, smelts	Gillnets And Entangling Nets - Gillnets	Chum salmon - gillnets	While illegal harvest has been substantially reduced from historical levels and current levels are constrained by the remoteness of the area, illegal harvest remains a chronic problem in the Bolshaya River. Therefore, this standard is not met._x000D_ _x000D_ Provide information on the level illegal fishery removals of Pink and Chum Salmon from the Bolshaya River.	The Client will provide a detailed plan for assessing the magnitude of illegal fishing in the Bolshaya River drainage by the first surveillance audit. In addition, to documenting enforcement activities, and media reports, the plan will include some methodology to quantify the amount of fish illegally harvested. For example, this may include reinstating/modifying KamchatNIRO studies to quantify il…	By the first annual surveillance, the client must present evidence that a plan is in place to address this condition. _x000D_ By the second annual surveillance, the client must present evidence that the plan has been implemented. _x000D_ By the third annual surveillance, the client must demonstrate that the condition has been met, at which time the fishery will rescore at least 80. _x000D_ Recomm…	Open	illegal
Narody Severa Bolsheretsk salmon	Certified	Narody Severa Bolsheretsk salmon	Default Tree v2.0 [Salmon]	1.2.3	Condition 2: Harvest strategy information and monitoring	Chum Salmon - 61, Western Kamchatka	Salmons, trouts, smelts	Seine Nets - Beach seines	Chum salmon - beach seine	While illegal harvest has been substantially reduced from historical levels and current levels are constrained by the remoteness of the area, illegal harvest remains a chronic problem in the Bolshaya River. Therefore, this standard is not met._x000D_ _x000D_ Provide information on the level illegal fishery removals of Pink and Chum Salmon from the Bolshaya River.	The Client will provide a detailed plan for assessing the magnitude of illegal fishing in the Bolshaya River drainage by the first surveillance audit. In addition, to documenting enforcement activities, and media reports, the plan will include some methodology to quantify the amount of fish illegally harvested. For example, this may include reinstating/modifying KamchatNIRO studies to quantify il…	By the first annual surveillance, the client must present evidence that a plan is in place to address this condition. _x000D_ By the second annual surveillance, the client must present evidence that the plan has been implemented. _x000D_ By the third annual surveillance, the client must demonstrate that the condition has been met, at which time the fishery will rescore at least 80. _x000D_ Recomm…	Open	illegal
Narody Severa Bolsheretsk salmon	Certified	Narody Severa Bolsheretsk salmon	Default Tree v2.0 [Salmon]	1.2.3	Condition 2: Harvest strategy information and monitoring	Chum Salmon - 61, Western Kamchatka	Salmons, trouts, smelts	Traps - Stow nets	Chum salmon - trap nets	While illegal harvest has been substantially reduced from historical levels and current levels are constrained by the remoteness of the area, illegal harvest remains a chronic problem in the Bolshaya River. Therefore, this standard is not met._x000D_ _x000D_ Provide information on the level illegal fishery removals of Pink and Chum Salmon from the Bolshaya River.	The Client will provide a detailed plan for assessing the magnitude of illegal fishing in the Bolshaya River drainage by the first surveillance audit. In addition, to documenting enforcement activities, and media reports, the plan will include some methodology to quantify the amount of fish illegally harvested. For example, this may include reinstating/modifying KamchatNIRO studies to quantify il…	By the first annual surveillance, the client must present evidence that a plan is in place to address this condition. _x000D_ By the second annual surveillance, the client must present evidence that the plan has been implemented. _x000D_ By the third annual surveillance, the client must demonstrate that the condition has been met, at which time the fishery will rescore at least 80. _x000D_ Recomm…	Open	illegal
The Bahamas Spiny Lobster Fishery	Certified	The Bahamas Spiny Lobster Fishery	Default Tree v2.0	3.2.3	Condition 4: Monitoring, control and surveillance mechanisms	Caribbean spiny lobster-West Altantic, Mexico	Lobsters, spiny-rock lobsters	Miscellaneous Gear	Spiny lobster - condos	There are not large-scale outlets of illegal fishery products. However, open access to the fishery by all Bahamians and limited resources to assess their compliance with the size limit demonstrates some potential for systematic noncompliance. Under-sized lobsters are commonly seen when day boats return to port and are for sale to locals and tourists. Whilst this is outside the scope of the assess…	Year 1: Continue to improve dialogue and collaboration between enforcement agencies concerning IUU detection and sanction options, including consideration of systematic non-compliance risks, and timelines to implement sanctions. This includes consideration of alignment of regulations and enforcement practices, such as issues surrounding the use of compressors outside of lawful depth limits. Conti…	Year 1: Engagement with other organisations (police, judiciary) on the issue of enforcement and sanctions for landing of undersized lobster. On-going at-sea enforcement efforts against IUU. Review of regulation and practices which are not currently aligned in the fishery. Score 75. _x000D_ Year 2: Agreement on appropriate enforcement and sanctions for noncompliance with lobster management regulat…	Open	MCS
The Bahamas Spiny Lobster Fishery	Certified	The Bahamas Spiny Lobster Fishery	Default Tree v2.0	3.2.3	Condition 4: Monitoring, control and surveillance mechanisms	Caribbean spiny lobster-West Altantic, Mexico	Lobsters, spiny-rock lobsters	Traps - Pots	Spiny lobster - lobster traps	There are not large-scale outlets of illegal fishery products. However, open access to the fishery by all Bahamians and limited resources to assess their compliance with the size limit demonstrates some potential for systematic noncompliance. Under-sized lobsters are commonly seen when day boats return to port and are for sale to locals and tourists. Whilst this is outside the scope of the assess…	Year 1: Continue to improve dialogue and collaboration between enforcement agencies concerning IUU detection and sanction options, including consideration of systematic non-compliance risks, and timelines to implement sanctions. This includes consideration of alignment of regulations and enforcement practices, such as issues surrounding the use of compressors outside of lawful depth limits. Conti…	Year 1: Engagement with other organisations (police, judiciary) on the issue of enforcement and sanctions for landing of undersized lobster. On-going at-sea enforcement efforts against IUU. Review of regulation and practices which are not currently aligned in the fishery. Score 75. _x000D_ Year 2: Agreement on appropriate enforcement and sanctions for noncompliance with lobster management regulat…	Open	MCS
Sant Yago TF Unassociated purse seine Atlantic yellowfin tuna fishery	Certified	Sant Yago TF Unassociated purse seine Atlantic yellowfin tuna fishery	Default Tree v2.0	3.2.3	Condition 6: Monitoring, control and surveillance	Yellowfin tuna Atlantic	Tunas, bonitos, billfishes	Surrounding Nets - With purse lines (purse seines)	Atlantic yellowfin tuna - FAD free purse seine	Both at ICCAT and clientâ€™s level, the implemented MCS system has demonstrated an ability to enforce relevant management measures and strategies, strategies and/or rules.(e.g. access to the fishery (IUU list, specific authorization for targeting tropical tunas), VMS, catch data collection and reporting, observers programsâ€¦ _x000D_ However, data presented in the latest meeting of the SCRS (made…	The client is promoting the development and implementation of stock management measures by ICCAT through the following channels: _x000D_ Participation in ISSF: since 2010 information has been sent to the representatives of the EU and Spain in the annual meetings of ICCAT alerting them of the management needs, such as: _x000D_ â€¢ implementation of management measures specific to each tuna populat…	Recognizing that ICCAT is the body responsible for the monitoring and enforcement of the TAC issued by the Commission, to address the condition the assessment team requires the client to work with DIPESCA and with other appropriate groups to strongly encourage ICCAT to review relevant yellowfin tuna conservation and management measures in place, so TAC can be effectively enforced. _x000D_ 1) Betw…	Open	MCS
Kamchatka River salmon	Certified	Kamchatka River salmon	Default Tree v2.0 [Salmon]	1.2.3	Condition 3: Harvest strategy information	Sockeye-61, Kamchatka	Salmons, trouts, smelts	Seine Nets - Beach seines	Sockeye salmon, Kamchatka - beach seines	While illegal harvest has been substantially reduced from historical levels and current levels are constrained by the remoteness of the area, illegal harvest remains a chronic problem in the Kamchatka River (KamchatNIRO 2017). Although it is likely that illegal removals are mostly occur downstream from the spawning escapement surveys areas and hence do not affect results of the surveys, informati…	By the first surveillance audit the Client will provide a plan on a research to estimate a level of potential illegal harvest in the area. The report will include Terms of Reference, list of potential candidate experts, and mechanism to perform an evaluation. By the second SA, the client will provide a written report to confirm that the analysis has been launched. The Client will consider an opti…	By the first annual surveillance, the client must present evidence that a plan is in place to address this condition. By the second annual surveillance, the client must present evidence that the plan has been implemented. By the third annual surveillance, the client must demonstrate that the condition has been met, at which time the fishery will rescore at least 80.	Open	illegal
Kamchatka River salmon	Certified	Kamchatka River salmon	Default Tree v2.0 [Salmon]	1.2.3	Condition 3: Harvest strategy information	Sockeye-61, Kamchatka	Salmons, trouts, smelts	Traps - Stow nets	Sockeye salmon, Kamchatka - coastal trapnets	While illegal harvest has been substantially reduced from historical levels and current levels are constrained by the remoteness of the area, illegal harvest remains a chronic problem in the Kamchatka River (KamchatNIRO 2017). Although it is likely that illegal removals are mostly occur downstream from the spawning escapement surveys areas and hence do not affect results of the surveys, informati…	By the first surveillance audit the Client will provide a plan on a research to estimate a level of potential illegal harvest in the area. The report will include Terms of Reference, list of potential candidate experts, and mechanism to perform an evaluation. By the second SA, the client will provide a written report to confirm that the analysis has been launched. The Client will consider an opti…	By the first annual surveillance, the client must present evidence that a plan is in place to address this condition. By the second annual surveillance, the client must present evidence that the plan has been implemented. By the third annual surveillance, the client must demonstrate that the condition has been met, at which time the fishery will rescore at least 80.	Open	illegal
Kamchatka River salmon	Certified	Kamchatka River salmon	Default Tree v2.0 [Salmon]	1.2.3	Condition 3: Harvest strategy information	Sockeye-61, Kamchatka	Salmons, trouts, smelts	Gillnets And Entangling Nets - Gillnets	Sockeye salmon, Kamchatka - set/drift gillnets	While illegal harvest has been substantially reduced from historical levels and current levels are constrained by the remoteness of the area, illegal harvest remains a chronic problem in the Kamchatka River (KamchatNIRO 2017). Although it is likely that illegal removals are mostly occur downstream from the spawning escapement surveys areas and hence do not affect results of the surveys, informati…	By the first surveillance audit the Client will provide a plan on a research to estimate a level of potential illegal harvest in the area. The report will include Terms of Reference, list of potential candidate experts, and mechanism to perform an evaluation. By the second SA, the client will provide a written report to confirm that the analysis has been launched. The Client will consider an opti…	By the first annual surveillance, the client must present evidence that a plan is in place to address this condition. By the second annual surveillance, the client must present evidence that the plan has been implemented. By the third annual surveillance, the client must demonstrate that the condition has been met, at which time the fishery will rescore at least 80.	Open	illegal
Kamchatka River salmon	Certified	Kamchatka River salmon	Default Tree v2.0 [Salmon]	1.2.3	Condition 3: Harvest strategy information	Chum-61, Kamchatka	Salmons, trouts, smelts	Gillnets And Entangling Nets - Gillnets	Chum salmon, Kamchatka - set/drift gillnets	While illegal harvest has been substantially reduced from historical levels and current levels are constrained by the remoteness of the area, illegal harvest remains a chronic problem in the Kamchatka River (KamchatNIRO 2017). Although it is likely that illegal removals are mostly occur downstream from the spawning escapement surveys areas and hence do not affect results of the surveys, informati…	By the first surveillance audit the Client will provide a plan on a research to estimate a level of potential illegal harvest in the area. The report will include Terms of Reference, list of potential candidate experts, and mechanism to perform an evaluation. By the second SA, the client will provide a written report to confirm that the analysis has been launched. The Client will consider an opti…	By the first annual surveillance, the client must present evidence that a plan is in place to address this condition. By the second annual surveillance, the client must present evidence that the plan has been implemented. By the third annual surveillance, the client must demonstrate that the condition has been met, at which time the fishery will rescore at least 80.	Open	illegal
Kamchatka River salmon	Certified	Kamchatka River salmon	Default Tree v2.0 [Salmon]	1.2.3	Condition 3: Harvest strategy information	Chum-61, Kamchatka	Salmons, trouts, smelts	Seine Nets - Beach seines	Chum salmon, Kamchatka - beach seines	While illegal harvest has been substantially reduced from historical levels and current levels are constrained by the remoteness of the area, illegal harvest remains a chronic problem in the Kamchatka River (KamchatNIRO 2017). Although it is likely that illegal removals are mostly occur downstream from the spawning escapement surveys areas and hence do not affect results of the surveys, informati…	By the first surveillance audit the Client will provide a plan on a research to estimate a level of potential illegal harvest in the area. The report will include Terms of Reference, list of potential candidate experts, and mechanism to perform an evaluation. By the second SA, the client will provide a written report to confirm that the analysis has been launched. The Client will consider an opti…	By the first annual surveillance, the client must present evidence that a plan is in place to address this condition. By the second annual surveillance, the client must present evidence that the plan has been implemented. By the third annual surveillance, the client must demonstrate that the condition has been met, at which time the fishery will rescore at least 80.	Open	illegal
Kamchatka River salmon	Certified	Kamchatka River salmon	Default Tree v2.0 [Salmon]	1.2.3	Condition 3: Harvest strategy information	Chum-61, Kamchatka	Salmons, trouts, smelts	Traps - Stow nets	Chum salmon, Kamchatka - coastal trapnets	While illegal harvest has been substantially reduced from historical levels and current levels are constrained by the remoteness of the area, illegal harvest remains a chronic problem in the Kamchatka River (KamchatNIRO 2017). Although it is likely that illegal removals are mostly occur downstream from the spawning escapement surveys areas and hence do not affect results of the surveys, informati…	By the first surveillance audit the Client will provide a plan on a research to estimate a level of potential illegal harvest in the area. The report will include Terms of Reference, list of potential candidate experts, and mechanism to perform an evaluation. By the second SA, the client will provide a written report to confirm that the analysis has been launched. The Client will consider an opti…	By the first annual surveillance, the client must present evidence that a plan is in place to address this condition. By the second annual surveillance, the client must present evidence that the plan has been implemented. By the third annual surveillance, the client must demonstrate that the condition has been met, at which time the fishery will rescore at least 80.	Open	illegal
Kamchatka River salmon	Certified	Kamchatka River salmon	Default Tree v2.0 [Salmon]	1.2.3	Condition 3: Harvest strategy information	Coho Salmon - 61, Western Kamchatka	Salmons, trouts, smelts	Gillnets And Entangling Nets - Gillnets	Coho salmon, Kamchatka - set/drift gillnets	While illegal harvest has been substantially reduced from historical levels and current levels are constrained by the remoteness of the area, illegal harvest remains a chronic problem in the Kamchatka River (KamchatNIRO 2017). Although it is likely that illegal removals are mostly occur downstream from the spawning escapement surveys areas and hence do not affect results of the surveys, informati…	By the first surveillance audit the Client will provide a plan on a research to estimate a level of potential illegal harvest in the area. The report will include Terms of Reference, list of potential candidate experts, and mechanism to perform an evaluation. By the second SA, the client will provide a written report to confirm that the analysis has been launched. The Client will consider an opti…	By the first annual surveillance, the client must present evidence that a plan is in place to address this condition. By the second annual surveillance, the client must present evidence that the plan has been implemented. By the third annual surveillance, the client must demonstrate that the condition has been met, at which time the fishery will rescore at least 80.	Open	illegal
Kamchatka River salmon	Certified	Kamchatka River salmon	Default Tree v2.0 [Salmon]	1.2.3	Condition 3: Harvest strategy information	Coho Salmon - 61, Western Kamchatka	Salmons, trouts, smelts	Seine Nets - Beach seines	Coho salmon, Kamchatka - beach seines	While illegal harvest has been substantially reduced from historical levels and current levels are constrained by the remoteness of the area, illegal harvest remains a chronic problem in the Kamchatka River (KamchatNIRO 2017). Although it is likely that illegal removals are mostly occur downstream from the spawning escapement surveys areas and hence do not affect results of the surveys, informati…	By the first surveillance audit the Client will provide a plan on a research to estimate a level of potential illegal harvest in the area. The report will include Terms of Reference, list of potential candidate experts, and mechanism to perform an evaluation. By the second SA, the client will provide a written report to confirm that the analysis has been launched. The Client will consider an opti…	By the first annual surveillance, the client must present evidence that a plan is in place to address this condition. By the second annual surveillance, the client must present evidence that the plan has been implemented. By the third annual surveillance, the client must demonstrate that the condition has been met, at which time the fishery will rescore at least 80.	Open	illegal
Kamchatka River salmon	Certified	Kamchatka River salmon	Default Tree v2.0 [Salmon]	1.2.3	Condition 3: Harvest strategy information	Coho Salmon - 61, Western Kamchatka	Salmons, trouts, smelts	Traps - Stow nets	Coho salmon, Kamchatka - coastal trapnets	While illegal harvest has been substantially reduced from historical levels and current levels are constrained by the remoteness of the area, illegal harvest remains a chronic problem in the Kamchatka River (KamchatNIRO 2017). Although it is likely that illegal removals are mostly occur downstream from the spawning escapement surveys areas and hence do not affect results of the surveys, informati…	By the first surveillance audit the Client will provide a plan on a research to estimate a level of potential illegal harvest in the area. The report will include Terms of Reference, list of potential candidate experts, and mechanism to perform an evaluation. By the second SA, the client will provide a written report to confirm that the analysis has been launched. The Client will consider an opti…	By the first annual surveillance, the client must present evidence that a plan is in place to address this condition. By the second annual surveillance, the client must present evidence that the plan has been implemented. By the third annual surveillance, the client must demonstrate that the condition has been met, at which time the fishery will rescore at least 80.	Open	illegal
Kamchatka River salmon	Certified	Kamchatka River salmon	Default Tree v2.0 [Salmon]	1.2.3	Condition 3: Harvest strategy information	Chinook-Kamchatka, FAO 61	Salmons, trouts, smelts	Gillnets And Entangling Nets - Gillnets	Chinook salmon, Kamchatka - set/drift gillnets	While illegal harvest has been substantially reduced from historical levels and current levels are constrained by the remoteness of the area, illegal harvest remains a chronic problem in the Kamchatka River (KamchatNIRO 2017). Although it is likely that illegal removals are mostly occur downstream from the spawning escapement surveys areas and hence do not affect results of the surveys, informati…	By the first surveillance audit the Client will provide a plan on a research to estimate a level of potential illegal harvest in the area. The report will include Terms of Reference, list of potential candidate experts, and mechanism to perform an evaluation. By the second SA, the client will provide a written report to confirm that the analysis has been launched. The Client will consider an opti…	By the first annual surveillance, the client must present evidence that a plan is in place to address this condition. By the second annual surveillance, the client must present evidence that the plan has been implemented. By the third annual surveillance, the client must demonstrate that the condition has been met, at which time the fishery will rescore at least 80.	Open	illegal
Kamchatka River salmon	Certified	Kamchatka River salmon	Default Tree v2.0 [Salmon]	1.2.3	Condition 3: Harvest strategy information	Chinook-Kamchatka, FAO 61	Salmons, trouts, smelts	Seine Nets - Beach seines	Chinook salmon, Kamchatka - beach seines	While illegal harvest has been substantially reduced from historical levels and current levels are constrained by the remoteness of the area, illegal harvest remains a chronic problem in the Kamchatka River (KamchatNIRO 2017). Although it is likely that illegal removals are mostly occur downstream from the spawning escapement surveys areas and hence do not affect results of the surveys, informati…	By the first surveillance audit the Client will provide a plan on a research to estimate a level of potential illegal harvest in the area. The report will include Terms of Reference, list of potential candidate experts, and mechanism to perform an evaluation. By the second SA, the client will provide a written report to confirm that the analysis has been launched. The Client will consider an opti…	By the first annual surveillance, the client must present evidence that a plan is in place to address this condition. By the second annual surveillance, the client must present evidence that the plan has been implemented. By the third annual surveillance, the client must demonstrate that the condition has been met, at which time the fishery will rescore at least 80.	Open	illegal
Kamchatka River salmon	Certified	Kamchatka River salmon	Default Tree v2.0 [Salmon]	1.2.3	Condition 3: Harvest strategy information	Chinook-Kamchatka, FAO 61	Salmons, trouts, smelts	Traps - Stow nets	Chinook salmon, Kamchatka - coastal trapnets	While illegal harvest has been substantially reduced from historical levels and current levels are constrained by the remoteness of the area, illegal harvest remains a chronic problem in the Kamchatka River (KamchatNIRO 2017). Although it is likely that illegal removals are mostly occur downstream from the spawning escapement surveys areas and hence do not affect results of the surveys, informati…	By the first surveillance audit the Client will provide a plan on a research to estimate a level of potential illegal harvest in the area. The report will include Terms of Reference, list of potential candidate experts, and mechanism to perform an evaluation. By the second SA, the client will provide a written report to confirm that the analysis has been launched. The Client will consider an opti…	By the first annual surveillance, the client must present evidence that a plan is in place to address this condition. By the second annual surveillance, the client must present evidence that the plan has been implemented. By the third annual surveillance, the client must demonstrate that the condition has been met, at which time the fishery will rescore at least 80.	Open	illegal
Tymlat Karaginsky Bay salmon fishery	Certified	Tymlat Karaginsky Bay salmon fishery	Default Tree v2.0 [Salmon]	3.2.3	Condition 5: Compliance and Enforcement	Pink Salmon- FAO 61, Eastern Kamchatka	Salmons, trouts, smelts	Seine Nets - Beach seines	Pink Salmon Beach Seines	This standard is not met because the available information shows that illegal fishing is still active in the area. Recently, in several settlements located in the UoC there were found significant (few metric tonnes) storages of illegal caviar which demonstrates presence of well-organised distributional networks despite on increasing level of enforcement. Moreover, very high level of anti-poaching…	The Client will provide a detailed plan for assessing the effectiveness of the monitoring, control and surveillance system in the unit of certification by the first surveillance audit. In addition, to documenting enforcement activities undertaken by SVTU and the fishing companies, and media reports, the plan will include some methodology to evaluate the relative effectiveness of enforcement activ…	By the first annual surveillance, the client must present evidence that a plan is in place to address this condition. By the second annual surveillance, the client must present evidence that the plan has been implemented. By the third annual surveillance, the client must demonstrate that the condition has been met, at which time the fishery will rescore at least 80.	Open	MCS
Tymlat Karaginsky Bay salmon fishery	Certified	Tymlat Karaginsky Bay salmon fishery	Default Tree v2.0 [Salmon]	3.2.3	Condition 5: Compliance and Enforcement	Pink Salmon- FAO 61, Eastern Kamchatka	Salmons, trouts, smelts	Traps	Pink Salmon Coastal Trapnets	This standard is not met because the available information shows that illegal fishing is still active in the area. Recently, in several settlements located in the UoC there were found significant (few metric tonnes) storages of illegal caviar which demonstrates presence of well-organised distributional networks despite on increasing level of enforcement. Moreover, very high level of anti-poaching…	The Client will provide a detailed plan for assessing the effectiveness of the monitoring, control and surveillance system in the unit of certification by the first surveillance audit. In addition, to documenting enforcement activities undertaken by SVTU and the fishing companies, and media reports, the plan will include some methodology to evaluate the relative effectiveness of enforcement activ…	By the first annual surveillance, the client must present evidence that a plan is in place to address this condition. By the second annual surveillance, the client must present evidence that the plan has been implemented. By the third annual surveillance, the client must demonstrate that the condition has been met, at which time the fishery will rescore at least 80.	Open	MCS
Tymlat Karaginsky Bay salmon fishery	Certified	Tymlat Karaginsky Bay salmon fishery	Default Tree v2.0 [Salmon]	3.2.3	Condition 5: Compliance and Enforcement	Chum-61, Kamchatka	Salmons, trouts, smelts	Seine Nets - Beach seines	Chum Salmon Beach Seines	This standard is not met because the available information shows that illegal fishing is still active in the area. Recently, in several settlements located in the UoC there were found significant (few metric tonnes) storages of illegal caviar which demonstrates presence of well-organised distributional networks despite on increasing level of enforcement. Moreover, very high level of anti-poaching…	The Client will provide a detailed plan for assessing the effectiveness of the monitoring, control and surveillance system in the unit of certification by the first surveillance audit. In addition, to documenting enforcement activities undertaken by SVTU and the fishing companies, and media reports, the plan will include some methodology to evaluate the relative effectiveness of enforcement activ…	By the first annual surveillance, the client must present evidence that a plan is in place to address this condition. By the second annual surveillance, the client must present evidence that the plan has been implemented. By the third annual surveillance, the client must demonstrate that the condition has been met, at which time the fishery will rescore at least 80.	Open	MCS
Tymlat Karaginsky Bay salmon fishery	Certified	Tymlat Karaginsky Bay salmon fishery	Default Tree v2.0 [Salmon]	3.2.3	Condition 5: Compliance and Enforcement	Chum-61, Kamchatka	Salmons, trouts, smelts	Traps	Chum Salmon Coastal Trapnets	This standard is not met because the available information shows that illegal fishing is still active in the area. Recently, in several settlements located in the UoC there were found significant (few metric tonnes) storages of illegal caviar which demonstrates presence of well-organised distributional networks despite on increasing level of enforcement. Moreover, very high level of anti-poaching…	The Client will provide a detailed plan for assessing the effectiveness of the monitoring, control and surveillance system in the unit of certification by the first surveillance audit. In addition, to documenting enforcement activities undertaken by SVTU and the fishing companies, and media reports, the plan will include some methodology to evaluate the relative effectiveness of enforcement activ…	By the first annual surveillance, the client must present evidence that a plan is in place to address this condition. By the second annual surveillance, the client must present evidence that the plan has been implemented. By the third annual surveillance, the client must demonstrate that the condition has been met, at which time the fishery will rescore at least 80.	Open	MCS
VA-Delta Kamchatka salmon fisheries	Certified with component(s) in assessment	VA-Delta Kamchatka Salmon Fisheries	Default Tree v2.0 [Salmon]	3.2.3	Condition 7: Compliance and Enforcement	Chum Salmon - 61, Western Kamchatka	Salmons, trouts, smelts	Seine Nets - Beach seines	VA-Delta Western Kamchatka chum salmon	Effective enforcement is only possible with considerable funding and cooperation among companies fishing companies depending on local fish resources. The chronic nature of this problem indicates that the monitoring, control and surveillance system has not demonstrated a complete ability to enforce relevant rules throughout the system. Enforcement cannot be considered comprehensive because the not…	The Client will provide a detailed plan for assessing the magnitude of illegal fishing in the unit of certification by the first surveillance audit. In addition, to independent fishery observer reports, enforcement activities, and media reports, the plan will include some methodology to evaluate the relative quantity of fish illegally harvested. For example, this may include anthropological/socio…	By the first annual surveillance, the client must present evidence that a plan is in place to address this condition. _x000D_ By the second annual surveillance, the client must present evidence that the plan has been implemented. _x000D_ By the third annual surveillance, the client must demonstrate that the condition has been met, at which time the fishery will rescore at least 80.	Closed	MCS
Western Asturias Octopus Traps Fishery of Artisanal Cofradias	Certified	Western Asturias Octopus Traps Fishery of Artisanal Cofradias	Default Tree v2.0	3.2.3	Condition 4A: Compliance & enforcement	Common Octopus - 27, ICES VIIIc	Squids, cuttlefishes, octopuses	Traps	Asturias and Galician cantabrian sea uoc	Score 65 (see re-scoring table in Appendix 1) _x000D_ _x000D_ Rationale _x000D_ The system has proven to be sufficient to meet most of the rules set out in the MP. However, it is known that there is a lack of robustness to enforce the rules exhaustively in relation to the total number of traps set at sea or to monitor the unloading of the catches. This seems to be cause by: _x000D_ _x000D_ i. Sho…	Client action plan _x000D_ MEASURE 1. ARPESOS WILL IMPLEMENT AN EFFECTIVE SANCTIONING PROCEDURE INCLUDING INFRINGMENTS ON THE MAXIMUM NUMBER OF AUTHORIZED TRAPS PER VESSEL _x000D_ _x000D_ PERIOD 1 (2017-2018). _x000D_ The ARPESOS Internal Regulations (expected to be adopted by the end of 2017) will include specific punishing measures in case of infringements on the maximum number of authorized tr…	Milestones _x000D_ The following elements can be verified during annual surveillance audit: _x000D_ _x000D_ Year 2: _x000D_ All stakeholders (but mainly guilds and fisheries administration) should be working to develop a protocol that clearly details the guardapescaâ€™s roles and responsibilities regarding the OFMP. Evidences must be provided that relevant stakeholders have discussed the issue of…	Open	MCS
Narody Severa Bolsheretsk salmon	Certified	Narody Severa Bolsheretsk salmon	Default Tree v2.0 [Salmon]	2.1.3	Condition 4: Primary species information	Pink Salmon - 61, Western Kamchatka	Salmons, trouts, smelts	Gillnets And Entangling Nets - Gillnets	Pink salmon - gillnets	The SG80 standard is not met due to reductions in the accuracy and precision of wild abundance estimates for Coho, Sockeye, and Chinook Salmon resulting from recent reductions in aerial survey efforts. Continuing reductions in aerial survey effort, which is the basis for inseason and post season stock assessment, raise concern for the sufficiency of information on spawning escapements for a repre…	Starting with the first surveillance audit, the Client will annually provide graphs comparing annual escapements of coho and sockeye salmon (for at least the previous 15 years) compared to the relevant, escapement targets for the Bolshaya, Opala and Kikhchick Rivers, by species and river. In addition. the Client will work with KamchatNIRO to develop a plan to demonstrate that survey indicator str…	By the first annual surveillance, the client must present evidence that a plan is in place to address this condition. _x000D_ By the second annual surveillance, the client must present evidence that the plan has been implemented. _x000D_ By the third annual surveillance, the client must demonstrate that the condition has been met, at which time the fishery will rescore at least 80. _x000D_ Recomm…	Open	illegal
Narody Severa Bolsheretsk salmon	Certified	Narody Severa Bolsheretsk salmon	Default Tree v2.0 [Salmon]	2.1.3	Condition 4: Primary species information	Chum Salmon - 61, Western Kamchatka	Salmons, trouts, smelts	Gillnets And Entangling Nets - Gillnets	Chum salmon - gillnets	The SG80 standard is not met due to reductions in the accuracy and precision of wild abundance estimates for Coho, Sockeye, and Chinook Salmon resulting from recent reductions in aerial survey efforts. Continuing reductions in aerial survey effort, which is the basis for inseason and post season stock assessment, raise concern for the sufficiency of information on spawning escapements for a repre…	Starting with the first surveillance audit, the Client will annually provide graphs comparing annual escapements of coho and sockeye salmon (for at least the previous 15 years) compared to the relevant, escapement targets for the Bolshaya, Opala and Kikhchick Rivers, by species and river. In addition. the Client will work with KamchatNIRO to develop a plan to demonstrate that survey indicator str…	By the first annual surveillance, the client must present evidence that a plan is in place to address this condition. _x000D_ By the second annual surveillance, the client must present evidence that the plan has been implemented. _x000D_ By the third annual surveillance, the client must demonstrate that the condition has been met, at which time the fishery will rescore at least 80. _x000D_ Recomm…	Open	illegal
Narody Severa Bolsheretsk salmon	Certified	Narody Severa Bolsheretsk salmon	Default Tree v2.0 [Salmon]	2.1.3	Condition 4: Primary species information	Pink Salmon - 61, Western Kamchatka	Salmons, trouts, smelts	Seine Nets - Beach seines	Pink salmon - beach seine	The SG80 standard is not met due to reductions in the accuracy and precision of wild abundance estimates for Coho, Sockeye, and Chinook Salmon resulting from recent reductions in aerial survey efforts. Continuing reductions in aerial survey effort, which is the basis for inseason and post season stock assessment, raise concern for the sufficiency of information on spawning escapements for a repre…	Starting with the first surveillance audit, the Client will annually provide graphs comparing annual escapements of coho and sockeye salmon (for at least the previous 15 years) compared to the relevant, escapement targets for the Bolshaya, Opala and Kikhchick Rivers, by species and river. In addition. the Client will work with KamchatNIRO to develop a plan to demonstrate that survey indicator str…	By the first annual surveillance, the client must present evidence that a plan is in place to address this condition. _x000D_ By the second annual surveillance, the client must present evidence that the plan has been implemented. _x000D_ By the third annual surveillance, the client must demonstrate that the condition has been met, at which time the fishery will rescore at least 80. _x000D_ Recomm…	Open	illegal
Narody Severa Bolsheretsk salmon	Certified	Narody Severa Bolsheretsk salmon	Default Tree v2.0 [Salmon]	2.1.3	Condition 4: Primary species information	Chum Salmon - 61, Western Kamchatka	Salmons, trouts, smelts	Seine Nets - Beach seines	Chum salmon - beach seine	The SG80 standard is not met due to reductions in the accuracy and precision of wild abundance estimates for Coho, Sockeye, and Chinook Salmon resulting from recent reductions in aerial survey efforts. Continuing reductions in aerial survey effort, which is the basis for inseason and post season stock assessment, raise concern for the sufficiency of information on spawning escapements for a repre…	Starting with the first surveillance audit, the Client will annually provide graphs comparing annual escapements of coho and sockeye salmon (for at least the previous 15 years) compared to the relevant, escapement targets for the Bolshaya, Opala and Kikhchick Rivers, by species and river. In addition. the Client will work with KamchatNIRO to develop a plan to demonstrate that survey indicator str…	By the first annual surveillance, the client must present evidence that a plan is in place to address this condition. _x000D_ By the second annual surveillance, the client must present evidence that the plan has been implemented. _x000D_ By the third annual surveillance, the client must demonstrate that the condition has been met, at which time the fishery will rescore at least 80. _x000D_ Recomm…	Open	illegal
Narody Severa Bolsheretsk salmon	Certified	Narody Severa Bolsheretsk salmon	Default Tree v2.0 [Salmon]	2.1.3	Condition 4: Primary species information	Pink Salmon - 61, Western Kamchatka	Salmons, trouts, smelts	Traps - Stow nets	Pink salmon - coastal trap nets	The SG80 standard is not met due to reductions in the accuracy and precision of wild abundance estimates for Coho, Sockeye, and Chinook Salmon resulting from recent reductions in aerial survey efforts. Continuing reductions in aerial survey effort, which is the basis for inseason and post season stock assessment, raise concern for the sufficiency of information on spawning escapements for a repre…	Starting with the first surveillance audit, the Client will annually provide graphs comparing annual escapements of coho and sockeye salmon (for at least the previous 15 years) compared to the relevant, escapement targets for the Bolshaya, Opala and Kikhchick Rivers, by species and river. In addition. the Client will work with KamchatNIRO to develop a plan to demonstrate that survey indicator str…	By the first annual surveillance, the client must present evidence that a plan is in place to address this condition. _x000D_ By the second annual surveillance, the client must present evidence that the plan has been implemented. _x000D_ By the third annual surveillance, the client must demonstrate that the condition has been met, at which time the fishery will rescore at least 80. _x000D_ Recomm…	Open	illegal
Narody Severa Bolsheretsk salmon	Certified	Narody Severa Bolsheretsk salmon	Default Tree v2.0 [Salmon]	2.1.3	Condition 4: Primary species information	Chum Salmon - 61, Western Kamchatka	Salmons, trouts, smelts	Traps - Stow nets	Chum salmon - trap nets	The SG80 standard is not met due to reductions in the accuracy and precision of wild abundance estimates for Coho, Sockeye, and Chinook Salmon resulting from recent reductions in aerial survey efforts. Continuing reductions in aerial survey effort, which is the basis for inseason and post season stock assessment, raise concern for the sufficiency of information on spawning escapements for a repre…	Starting with the first surveillance audit, the Client will annually provide graphs comparing annual escapements of coho and sockeye salmon (for at least the previous 15 years) compared to the relevant, escapement targets for the Bolshaya, Opala and Kikhchick Rivers, by species and river. In addition. the Client will work with KamchatNIRO to develop a plan to demonstrate that survey indicator str…	By the first annual surveillance, the client must present evidence that a plan is in place to address this condition. _x000D_ By the second annual surveillance, the client must present evidence that the plan has been implemented. _x000D_ By the third annual surveillance, the client must demonstrate that the condition has been met, at which time the fishery will rescore at least 80. _x000D_ Recomm…	Open	illegal
Narody Severa Bolsheretsk salmon	Certified	Narody Severa Bolsheretsk salmon	Default Tree v2.0 [Salmon]	3.2.3	Condition 6: Compliance and enforcement	Pink Salmon - 61, Western Kamchatka	Salmons, trouts, smelts	Gillnets And Entangling Nets - Gillnets	Pink salmon - gillnets	Effective enforcement is only possible with considerable funding and cooperation among the fishing companies depending on local fish resources. The chronic nature of illegal fishing in some areas indicates that the monitoring, control and surveillance system has not demonstrated a complete ability to enforce relevant rules throughout the system. Enforcement cannot be considered comprehensive beca…	The Client will provide a detailed plan for assessing the effectiveness of the monitoring, control and surveillance system in the unit of certification by the first surveillance audit. In addition, to documenting enforcement activities undertaken by SVTU, KamchatNIRO and the fishing companies, and media reports, the plan will include some methodology to evaluate the relative effectiveness of enfo…	By the first annual surveillance, the client must present evidence that a plan is in place to address this condition. _x000D_ By the second annual surveillance, the client must present evidence that the plan has been implemented. _x000D_ By the third annual surveillance, the client must demonstrate that the condition has been met, at which time the fishery will rescore at least 80. _x000D_ Recomm…	Open	MCS
Narody Severa Bolsheretsk salmon	Certified	Narody Severa Bolsheretsk salmon	Default Tree v2.0 [Salmon]	3.2.3	Condition 6: Compliance and enforcement	Chum Salmon - 61, Western Kamchatka	Salmons, trouts, smelts	Gillnets And Entangling Nets - Gillnets	Chum salmon - gillnets	Effective enforcement is only possible with considerable funding and cooperation among the fishing companies depending on local fish resources. The chronic nature of illegal fishing in some areas indicates that the monitoring, control and surveillance system has not demonstrated a complete ability to enforce relevant rules throughout the system. Enforcement cannot be considered comprehensive beca…	The Client will provide a detailed plan for assessing the effectiveness of the monitoring, control and surveillance system in the unit of certification by the first surveillance audit. In addition, to documenting enforcement activities undertaken by SVTU, KamchatNIRO and the fishing companies, and media reports, the plan will include some methodology to evaluate the relative effectiveness of enfo…	By the first annual surveillance, the client must present evidence that a plan is in place to address this condition. _x000D_ By the second annual surveillance, the client must present evidence that the plan has been implemented. _x000D_ By the third annual surveillance, the client must demonstrate that the condition has been met, at which time the fishery will rescore at least 80. _x000D_ Recomm…	Open	MCS
Narody Severa Bolsheretsk salmon	Certified	Narody Severa Bolsheretsk salmon	Default Tree v2.0 [Salmon]	3.2.3	Condition 6: Compliance and enforcement	Pink Salmon - 61, Western Kamchatka	Salmons, trouts, smelts	Seine Nets - Beach seines	Pink salmon - beach seine	Effective enforcement is only possible with considerable funding and cooperation among the fishing companies depending on local fish resources. The chronic nature of illegal fishing in some areas indicates that the monitoring, control and surveillance system has not demonstrated a complete ability to enforce relevant rules throughout the system. Enforcement cannot be considered comprehensive beca…	The Client will provide a detailed plan for assessing the effectiveness of the monitoring, control and surveillance system in the unit of certification by the first surveillance audit. In addition, to documenting enforcement activities undertaken by SVTU, KamchatNIRO and the fishing companies, and media reports, the plan will include some methodology to evaluate the relative effectiveness of enfo…	By the first annual surveillance, the client must present evidence that a plan is in place to address this condition. _x000D_ By the second annual surveillance, the client must present evidence that the plan has been implemented. _x000D_ By the third annual surveillance, the client must demonstrate that the condition has been met, at which time the fishery will rescore at least 80. _x000D_ Recomm…	Open	MCS
Narody Severa Bolsheretsk salmon	Certified	Narody Severa Bolsheretsk salmon	Default Tree v2.0 [Salmon]	3.2.3	Condition 6: Compliance and enforcement	Chum Salmon - 61, Western Kamchatka	Salmons, trouts, smelts	Seine Nets - Beach seines	Chum salmon - beach seine	Effective enforcement is only possible with considerable funding and cooperation among the fishing companies depending on local fish resources. The chronic nature of illegal fishing in some areas indicates that the monitoring, control and surveillance system has not demonstrated a complete ability to enforce relevant rules throughout the system. Enforcement cannot be considered comprehensive beca…	The Client will provide a detailed plan for assessing the effectiveness of the monitoring, control and surveillance system in the unit of certification by the first surveillance audit. In addition, to documenting enforcement activities undertaken by SVTU, KamchatNIRO and the fishing companies, and media reports, the plan will include some methodology to evaluate the relative effectiveness of enfo…	By the first annual surveillance, the client must present evidence that a plan is in place to address this condition. _x000D_ By the second annual surveillance, the client must present evidence that the plan has been implemented. _x000D_ By the third annual surveillance, the client must demonstrate that the condition has been met, at which time the fishery will rescore at least 80. _x000D_ Recomm…	Open	MCS
Narody Severa Bolsheretsk salmon	Certified	Narody Severa Bolsheretsk salmon	Default Tree v2.0 [Salmon]	3.2.3	Condition 6: Compliance and enforcement	Pink Salmon - 61, Western Kamchatka	Salmons, trouts, smelts	Traps - Stow nets	Pink salmon - coastal trap nets	Effective enforcement is only possible with considerable funding and cooperation among the fishing companies depending on local fish resources. The chronic nature of illegal fishing in some areas indicates that the monitoring, control and surveillance system has not demonstrated a complete ability to enforce relevant rules throughout the system. Enforcement cannot be considered comprehensive beca…	The Client will provide a detailed plan for assessing the effectiveness of the monitoring, control and surveillance system in the unit of certification by the first surveillance audit. In addition, to documenting enforcement activities undertaken by SVTU, KamchatNIRO and the fishing companies, and media reports, the plan will include some methodology to evaluate the relative effectiveness of enfo…	By the first annual surveillance, the client must present evidence that a plan is in place to address this condition. _x000D_ By the second annual surveillance, the client must present evidence that the plan has been implemented. _x000D_ By the third annual surveillance, the client must demonstrate that the condition has been met, at which time the fishery will rescore at least 80. _x000D_ Recomm…	Open	MCS
Narody Severa Bolsheretsk salmon	Certified	Narody Severa Bolsheretsk salmon	Default Tree v2.0 [Salmon]	3.2.3	Condition 6: Compliance and enforcement	Chum Salmon - 61, Western Kamchatka	Salmons, trouts, smelts	Traps - Stow nets	Chum salmon - trap nets	Effective enforcement is only possible with considerable funding and cooperation among the fishing companies depending on local fish resources. The chronic nature of illegal fishing in some areas indicates that the monitoring, control and surveillance system has not demonstrated a complete ability to enforce relevant rules throughout the system. Enforcement cannot be considered comprehensive beca…	The Client will provide a detailed plan for assessing the effectiveness of the monitoring, control and surveillance system in the unit of certification by the first surveillance audit. In addition, to documenting enforcement activities undertaken by SVTU, KamchatNIRO and the fishing companies, and media reports, the plan will include some methodology to evaluate the relative effectiveness of enfo…	By the first annual surveillance, the client must present evidence that a plan is in place to address this condition. _x000D_ By the second annual surveillance, the client must present evidence that the plan has been implemented. _x000D_ By the third annual surveillance, the client must demonstrate that the condition has been met, at which time the fishery will rescore at least 80. _x000D_ Recomm…	Open	MCS
The Poole Harbour Clam & Cockle Fishery	Certified	The Poole Harbour Clam & Cockle Fishery	Default Tree v2.0	1.2.3	Condition 1: Harvest Strategy	Manila clam-Poole harbour	Clams, cockles, arkshells	Dredges - Boat dredges	Southern IFCA Poole Harbour. Gear: Pump and scoop dredge.	Stock abundance is monitored annually through the Southern IFCA stock surveys providing information on spatial and temporal variability in stock abundance, stock structure and recruitment which enables the Southern IFCA to implement management changes if necessary. CPUE calculated from permit returns also provides an index of stock abundance. Permit holders must submit monthly catch returns recor…	The client fishery will develop the monthly catch return forms submitted by the permitted fishers under the Poole Harbour Dredge Permit byelaw to indicate specified fishing areas within the Harbour rather than an aggregated daily figure. This process will involve an addition to the monthly catch return form and the associated condition (2.2) in the Poole Harbour Dredge Permit and therefore the pr…	Annual surveillance 1: Show written evidence of consultation with permit holders to agree that monthly catch returns by permit holders will be completed for each specified fishing area as opposed to an aggregated daily figure. Expected interim score: 75 _x000D_ _x000D_ Annual surveillance 2: Provide evidence that a new monthly catch return form has been designed and implemented. Expected interim …	Open	reporting
The Poole Harbour Clam & Cockle Fishery	Certified	The Poole Harbour Clam & Cockle Fishery	Default Tree v2.0	1.2.3	Condition 1: Harvest Strategy	Common cockle-Poole Harbour	Clams, cockles, arkshells	Dredges - Boat dredges	Southern IFCA Poole Harbour. Gear: Pump and scoop dredge.	Stock abundance is monitored annually through the Southern IFCA stock surveys providing information on spatial and temporal variability in stock abundance, stock structure and recruitment which enables the Southern IFCA to implement management changes if necessary. CPUE calculated from permit returns also provides an index of stock abundance. Permit holders must submit monthly catch returns recor…	The client fishery will develop the monthly catch return forms submitted by the permitted fishers under the Poole Harbour Dredge Permit byelaw to indicate specified fishing areas within the Harbour rather than an aggregated daily figure. This process will involve an addition to the monthly catch return form and the associated condition (2.2) in the Poole Harbour Dredge Permit and therefore the pr…	Annual surveillance 1: Show written evidence of consultation with permit holders to agree that monthly catch returns by permit holders will be completed for each specified fishing area as opposed to an aggregated daily figure. Expected interim score: 75 _x000D_ _x000D_ Annual surveillance 2: Provide evidence that a new monthly catch return form has been designed and implemented. Expected interim …	Open	reporting
Bratsk Reservoir perch	Certified	Bratsk Reservoir perch	Default Tree v2.0	1.2.4	Condition 4: Assessment of Stock Status	European Perch - 07, Bratsk Reservoir	Miscellaneous freshwater fishes	Traps - Stationary uncovered pound nets	Bratsk Reservoir perch	Rationale:_x000D_ The stock assessment takes a precautionary approach. In setting RACs (quotas) it does not consider stocks for the entire reservoir. Rather it only considers stocks on the fishing grounds, representing 24 % of the total area. Since the fishery operates on only about a quarter of the available habitat, we assume that they also fish on 24 % of the total population because fish dens…	Year 1:_x000D_ Gather and summarize information from the monitoring program for juvenile by-catch, recreational and IUU fishing, and catch composition in trap nets, as_x000D_ described in Conditions 1, 2 and 3, respectively._x000D_ _x000D_ Make initial estimates of perch mortality associated with changing water levels in the reservoir._x000D_ _x000D_ Review key information gaps in stock assessmen…	Milestones:_x000D_ Surveillance 1: The Client should review key information gaps in stock assessment data and consider alternative methods to account for uncertainties related to recreational and IUU fishing, juvenile by-catch, catch in trap nets, and significant sources of non-fishery mortality. Prepare Year 1 Report with analysis of key information gaps. No change in score expected._x000D_ Surv…	Open	illegal
Lake Peipus perch and pike-perch	Certified	Lake Peipus perch and pike-perch	Default Tree v2.0	1.2.4	Condition 2: Perch Stock Status	European perch - 05, Lake Peipus	Miscellaneous freshwater fishes	Gillnets And Entangling Nets - Gillnets	Perch	Rationale The assessment identifies major sources of uncertainty. Estimation of the level of recreational fishing is based on questionnaires received from recreational fishers (responsibility of Ministry of Environment). Volumes of fish caught by recreational fishers are based on the number of fishermen on the Peipus Lake during winter and summer periods, the intensity of fishing, intensity of fi…	Client action plan _x000D_ _x000D_ Year 1. _x000D_ The Client, in consultations with Estonian Fishery Inspectorate, Ministry of Environment, Ministry of Rural Affairs and Estonian Marine Institute, develops a plan of survey aiming to describe of patterns and magnitude of recreational and illegal fishing of perch in Peipus Lake, including discarding of juvenile perch. The latest question will be a…	Milestones Please note: Milestones here are similar or the same as those for Condition 1. Year 1: - Design a scientifically valid approach to determine the sources and amounts of perch mortality associated with recreational and IUU fishing in Lake Peipus (including of juvenile by-catch and discarding) that will aid in meeting the SG80 requirement for this SI. - Provide a description of the plan t…	Open	transparent
Kamchatka River salmon	Certified	Kamchatka River salmon	Default Tree v2.0 [Salmon]	3.2.3	Condition 6: Compliance and enforcement	Sockeye-61, Kamchatka	Salmons, trouts, smelts	Traps - Stow nets	Sockeye salmon, Kamchatka - coastal trapnets	Effective enforcement is only possible with considerable funding and cooperation among the fishing companies depending on local fish resources. The chronic nature of illegal fishing in some areas indicates that the monitoring, control and surveillance system has not demonstrated a complete ability to enforce relevant rules throughout the system. Enforcement cannot be considered comprehensive beca…	The Client will provide annual report on enforcement efforts and effectiveness by the fishery and government. The report will include official enforcement statistics, sanctions, industry control activities results, overview of other sources. By the second surveillance, the Client will provide a written plan (timeline, methodology overview) on conducting an expert analysis of illegal salmon practi…	By the first annual surveillance, the client must present evidence that a plan is in place to address this condition. By the second annual surveillance, the client must present evidence that the plan has been implemented. By the third annual surveillance, the client must demonstrate that the condition has been met, at which time the fishery will rescore at least 80.	Open	MCS
Kamchatka River salmon	Certified	Kamchatka River salmon	Default Tree v2.0 [Salmon]	3.2.3	Condition 6: Compliance and enforcement	Chum-61, Kamchatka	Salmons, trouts, smelts	Seine Nets - Beach seines	Chum salmon, Kamchatka - beach seines	Effective enforcement is only possible with considerable funding and cooperation among the fishing companies depending on local fish resources. The chronic nature of illegal fishing in some areas indicates that the monitoring, control and surveillance system has not demonstrated a complete ability to enforce relevant rules throughout the system. Enforcement cannot be considered comprehensive beca…	The Client will provide annual report on enforcement efforts and effectiveness by the fishery and government. The report will include official enforcement statistics, sanctions, industry control activities results, overview of other sources. By the second surveillance, the Client will provide a written plan (timeline, methodology overview) on conducting an expert analysis of illegal salmon practi…	By the first annual surveillance, the client must present evidence that a plan is in place to address this condition. By the second annual surveillance, the client must present evidence that the plan has been implemented. By the third annual surveillance, the client must demonstrate that the condition has been met, at which time the fishery will rescore at least 80.	Open	MCS
Kamchatka River salmon	Certified	Kamchatka River salmon	Default Tree v2.0 [Salmon]	3.2.3	Condition 6: Compliance and enforcement	Coho Salmon - 61, Western Kamchatka	Salmons, trouts, smelts	Seine Nets - Beach seines	Coho salmon, Kamchatka - beach seines	Effective enforcement is only possible with considerable funding and cooperation among the fishing companies depending on local fish resources. The chronic nature of illegal fishing in some areas indicates that the monitoring, control and surveillance system has not demonstrated a complete ability to enforce relevant rules throughout the system. Enforcement cannot be considered comprehensive beca…	The Client will provide annual report on enforcement efforts and effectiveness by the fishery and government. The report will include official enforcement statistics, sanctions, industry control activities results, overview of other sources. By the second surveillance, the Client will provide a written plan (timeline, methodology overview) on conducting an expert analysis of illegal salmon practi…	By the first annual surveillance, the client must present evidence that a plan is in place to address this condition. By the second annual surveillance, the client must present evidence that the plan has been implemented. By the third annual surveillance, the client must demonstrate that the condition has been met, at which time the fishery will rescore at least 80.	Open	MCS
Kamchatka River salmon	Certified	Kamchatka River salmon	Default Tree v2.0 [Salmon]	3.2.3	Condition 6: Compliance and enforcement	Sockeye-61, Kamchatka	Salmons, trouts, smelts	Seine Nets - Beach seines	Sockeye salmon, Kamchatka - beach seines	Effective enforcement is only possible with considerable funding and cooperation among the fishing companies depending on local fish resources. The chronic nature of illegal fishing in some areas indicates that the monitoring, control and surveillance system has not demonstrated a complete ability to enforce relevant rules throughout the system. Enforcement cannot be considered comprehensive beca…	The Client will provide annual report on enforcement efforts and effectiveness by the fishery and government. The report will include official enforcement statistics, sanctions, industry control activities results, overview of other sources. By the second surveillance, the Client will provide a written plan (timeline, methodology overview) on conducting an expert analysis of illegal salmon practi…	By the first annual surveillance, the client must present evidence that a plan is in place to address this condition. By the second annual surveillance, the client must present evidence that the plan has been implemented. By the third annual surveillance, the client must demonstrate that the condition has been met, at which time the fishery will rescore at least 80.	Open	MCS
Kamchatka River salmon	Certified	Kamchatka River salmon	Default Tree v2.0 [Salmon]	3.2.3	Condition 6: Compliance and enforcement	Chinook-Kamchatka, FAO 61	Salmons, trouts, smelts	Traps - Stow nets	Chinook salmon, Kamchatka - coastal trapnets	Effective enforcement is only possible with considerable funding and cooperation among the fishing companies depending on local fish resources. The chronic nature of illegal fishing in some areas indicates that the monitoring, control and surveillance system has not demonstrated a complete ability to enforce relevant rules throughout the system. Enforcement cannot be considered comprehensive beca…	The Client will provide annual report on enforcement efforts and effectiveness by the fishery and government. The report will include official enforcement statistics, sanctions, industry control activities results, overview of other sources. By the second surveillance, the Client will provide a written plan (timeline, methodology overview) on conducting an expert analysis of illegal salmon practi…	By the first annual surveillance, the client must present evidence that a plan is in place to address this condition. By the second annual surveillance, the client must present evidence that the plan has been implemented. By the third annual surveillance, the client must demonstrate that the condition has been met, at which time the fishery will rescore at least 80.	Open	MCS
Kamchatka River salmon	Certified	Kamchatka River salmon	Default Tree v2.0 [Salmon]	3.2.3	Condition 6: Compliance and enforcement	Chum-61, Kamchatka	Salmons, trouts, smelts	Traps - Stow nets	Chum salmon, Kamchatka - coastal trapnets	Effective enforcement is only possible with considerable funding and cooperation among the fishing companies depending on local fish resources. The chronic nature of illegal fishing in some areas indicates that the monitoring, control and surveillance system has not demonstrated a complete ability to enforce relevant rules throughout the system. Enforcement cannot be considered comprehensive beca…	The Client will provide annual report on enforcement efforts and effectiveness by the fishery and government. The report will include official enforcement statistics, sanctions, industry control activities results, overview of other sources. By the second surveillance, the Client will provide a written plan (timeline, methodology overview) on conducting an expert analysis of illegal salmon practi…	By the first annual surveillance, the client must present evidence that a plan is in place to address this condition. By the second annual surveillance, the client must present evidence that the plan has been implemented. By the third annual surveillance, the client must demonstrate that the condition has been met, at which time the fishery will rescore at least 80.	Open	MCS
Kamchatka River salmon	Certified	Kamchatka River salmon	Default Tree v2.0 [Salmon]	3.2.3	Condition 6: Compliance and enforcement	Coho Salmon - 61, Western Kamchatka	Salmons, trouts, smelts	Traps - Stow nets	Coho salmon, Kamchatka - coastal trapnets	Effective enforcement is only possible with considerable funding and cooperation among the fishing companies depending on local fish resources. The chronic nature of illegal fishing in some areas indicates that the monitoring, control and surveillance system has not demonstrated a complete ability to enforce relevant rules throughout the system. Enforcement cannot be considered comprehensive beca…	The Client will provide annual report on enforcement efforts and effectiveness by the fishery and government. The report will include official enforcement statistics, sanctions, industry control activities results, overview of other sources. By the second surveillance, the Client will provide a written plan (timeline, methodology overview) on conducting an expert analysis of illegal salmon practi…	By the first annual surveillance, the client must present evidence that a plan is in place to address this condition. By the second annual surveillance, the client must present evidence that the plan has been implemented. By the third annual surveillance, the client must demonstrate that the condition has been met, at which time the fishery will rescore at least 80.	Open	MCS
Kamchatka River salmon	Certified	Kamchatka River salmon	Default Tree v2.0 [Salmon]	3.2.3	Condition 6: Compliance and enforcement	Chinook-Kamchatka, FAO 61	Salmons, trouts, smelts	Gillnets And Entangling Nets - Gillnets	Chinook salmon, Kamchatka - set/drift gillnets	Effective enforcement is only possible with considerable funding and cooperation among the fishing companies depending on local fish resources. The chronic nature of illegal fishing in some areas indicates that the monitoring, control and surveillance system has not demonstrated a complete ability to enforce relevant rules throughout the system. Enforcement cannot be considered comprehensive beca…	The Client will provide annual report on enforcement efforts and effectiveness by the fishery and government. The report will include official enforcement statistics, sanctions, industry control activities results, overview of other sources. By the second surveillance, the Client will provide a written plan (timeline, methodology overview) on conducting an expert analysis of illegal salmon practi…	By the first annual surveillance, the client must present evidence that a plan is in place to address this condition. By the second annual surveillance, the client must present evidence that the plan has been implemented. By the third annual surveillance, the client must demonstrate that the condition has been met, at which time the fishery will rescore at least 80.	Open	MCS
Kamchatka River salmon	Certified	Kamchatka River salmon	Default Tree v2.0 [Salmon]	3.2.3	Condition 6: Compliance and enforcement	Chum-61, Kamchatka	Salmons, trouts, smelts	Gillnets And Entangling Nets - Gillnets	Chum salmon, Kamchatka - set/drift gillnets	Effective enforcement is only possible with considerable funding and cooperation among the fishing companies depending on local fish resources. The chronic nature of illegal fishing in some areas indicates that the monitoring, control and surveillance system has not demonstrated a complete ability to enforce relevant rules throughout the system. Enforcement cannot be considered comprehensive beca…	The Client will provide annual report on enforcement efforts and effectiveness by the fishery and government. The report will include official enforcement statistics, sanctions, industry control activities results, overview of other sources. By the second surveillance, the Client will provide a written plan (timeline, methodology overview) on conducting an expert analysis of illegal salmon practi…	By the first annual surveillance, the client must present evidence that a plan is in place to address this condition. By the second annual surveillance, the client must present evidence that the plan has been implemented. By the third annual surveillance, the client must demonstrate that the condition has been met, at which time the fishery will rescore at least 80.	Open	MCS
Kamchatka River salmon	Certified	Kamchatka River salmon	Default Tree v2.0 [Salmon]	3.2.3	Condition 6: Compliance and enforcement	Coho Salmon - 61, Western Kamchatka	Salmons, trouts, smelts	Gillnets And Entangling Nets - Gillnets	Coho salmon, Kamchatka - set/drift gillnets	Effective enforcement is only possible with considerable funding and cooperation among the fishing companies depending on local fish resources. The chronic nature of illegal fishing in some areas indicates that the monitoring, control and surveillance system has not demonstrated a complete ability to enforce relevant rules throughout the system. Enforcement cannot be considered comprehensive beca…	The Client will provide annual report on enforcement efforts and effectiveness by the fishery and government. The report will include official enforcement statistics, sanctions, industry control activities results, overview of other sources. By the second surveillance, the Client will provide a written plan (timeline, methodology overview) on conducting an expert analysis of illegal salmon practi…	By the first annual surveillance, the client must present evidence that a plan is in place to address this condition. By the second annual surveillance, the client must present evidence that the plan has been implemented. By the third annual surveillance, the client must demonstrate that the condition has been met, at which time the fishery will rescore at least 80.	Open	MCS
Kamchatka River salmon	Certified	Kamchatka River salmon	Default Tree v2.0 [Salmon]	3.2.3	Condition 6: Compliance and enforcement	Sockeye-61, Kamchatka	Salmons, trouts, smelts	Gillnets And Entangling Nets - Gillnets	Sockeye salmon, Kamchatka - set/drift gillnets	Effective enforcement is only possible with considerable funding and cooperation among the fishing companies depending on local fish resources. The chronic nature of illegal fishing in some areas indicates that the monitoring, control and surveillance system has not demonstrated a complete ability to enforce relevant rules throughout the system. Enforcement cannot be considered comprehensive beca…	The Client will provide annual report on enforcement efforts and effectiveness by the fishery and government. The report will include official enforcement statistics, sanctions, industry control activities results, overview of other sources. By the second surveillance, the Client will provide a written plan (timeline, methodology overview) on conducting an expert analysis of illegal salmon practi…	By the first annual surveillance, the client must present evidence that a plan is in place to address this condition. By the second annual surveillance, the client must present evidence that the plan has been implemented. By the third annual surveillance, the client must demonstrate that the condition has been met, at which time the fishery will rescore at least 80.	Open	MCS
Kamchatka River salmon	Certified	Kamchatka River salmon	Default Tree v2.0 [Salmon]	3.2.3	Condition 6: Compliance and enforcement	Chinook-Kamchatka, FAO 61	Salmons, trouts, smelts	Seine Nets - Beach seines	Chinook salmon, Kamchatka - beach seines	Effective enforcement is only possible with considerable funding and cooperation among the fishing companies depending on local fish resources. The chronic nature of illegal fishing in some areas indicates that the monitoring, control and surveillance system has not demonstrated a complete ability to enforce relevant rules throughout the system. Enforcement cannot be considered comprehensive beca…	The Client will provide annual report on enforcement efforts and effectiveness by the fishery and government. The report will include official enforcement statistics, sanctions, industry control activities results, overview of other sources. By the second surveillance, the Client will provide a written plan (timeline, methodology overview) on conducting an expert analysis of illegal salmon practi…	By the first annual surveillance, the client must present evidence that a plan is in place to address this condition. By the second annual surveillance, the client must present evidence that the plan has been implemented. By the third annual surveillance, the client must demonstrate that the condition has been met, at which time the fishery will rescore at least 80.	Open	MCS
Alaska salmon	Certified	Alaska salmon	Default Tree v2.0 [Salmon]	3.2.2	Condition 9: Decision making	Pink(=Humpback) salmon-SE Alaska	Salmons, trouts, smelts	Surrounding Nets - With purse lines (purse seines)	SEAK	While ADFG decision-making processes are generally responsive to serious issues identified through research, monitoring, evaluation and consultation, it is not clear that they do so for all Ã¢â‚¬Å“serious and other important issuesÃ¢â‚¬Â as required by SG80 scoring issue B. New information presented by stakeholders regarding specific important issues (e.g. straying of chum salmon into West Crawf…	AFDF ACTION: AFDF will work with ADFG and NSRAA to document evidence of actions taken in response to new and unexpected information related to LCI and WCI hatchery strays. Additionally, AFDF will report on ADFGÃ¢â‚¬â„¢s progress towards implementation of the proposal presented at the March 7th, 2020 BOF Hatchery Committee Meeting, which outlined a third-party convening of a working group of agenc…	By the 2nd annual surveillance (around November 2020) demonstrate that a plan is in place to ensure the management system can respond to serious and other important issues and uses the precautionary approach in decision-making as issues arise through research, monitoring, evaluation and consultation. By the 3rd annual surveillance audit (around November 2021) demonstrate that this plan is being c…	Open	transparent
Alaska salmon	Certified	Alaska salmon	Default Tree v2.0 [Salmon]	3.2.2	Condition 9: Decision making	Pink(=Humpback) salmon-SE Alaska	Salmons, trouts, smelts	Hooks And Lines - Trolling lines	SEAK	While ADFG decision-making processes are generally responsive to serious issues identified through research, monitoring, evaluation and consultation, it is not clear that they do so for all Ã¢â‚¬Å“serious and other important issuesÃ¢â‚¬Â as required by SG80 scoring issue B. New information presented by stakeholders regarding specific important issues (e.g. straying of chum salmon into West Crawf…	AFDF ACTION: AFDF will work with ADFG and NSRAA to document evidence of actions taken in response to new and unexpected information related to LCI and WCI hatchery strays. Additionally, AFDF will report on ADFGÃ¢â‚¬â„¢s progress towards implementation of the proposal presented at the March 7th, 2020 BOF Hatchery Committee Meeting, which outlined a third-party convening of a working group of agenc…	By the 2nd annual surveillance (around November 2020) demonstrate that a plan is in place to ensure the management system can respond to serious and other important issues and uses the precautionary approach in decision-making as issues arise through research, monitoring, evaluation and consultation. By the 3rd annual surveillance audit (around November 2021) demonstrate that this plan is being c…	Open	transparent
Alaska salmon	Certified	Alaska salmon	Default Tree v2.0 [Salmon]	3.2.2	Condition 9: Decision making	Pink(=Humpback) salmon-SE Alaska	Salmons, trouts, smelts	Gillnets And Entangling Nets - Driftnets	SEAK	While ADFG decision-making processes are generally responsive to serious issues identified through research, monitoring, evaluation and consultation, it is not clear that they do so for all Ã¢â‚¬Å“serious and other important issuesÃ¢â‚¬Â as required by SG80 scoring issue B. New information presented by stakeholders regarding specific important issues (e.g. straying of chum salmon into West Crawf…	AFDF ACTION: AFDF will work with ADFG and NSRAA to document evidence of actions taken in response to new and unexpected information related to LCI and WCI hatchery strays. Additionally, AFDF will report on ADFGÃ¢â‚¬â„¢s progress towards implementation of the proposal presented at the March 7th, 2020 BOF Hatchery Committee Meeting, which outlined a third-party convening of a working group of agenc…	By the 2nd annual surveillance (around November 2020) demonstrate that a plan is in place to ensure the management system can respond to serious and other important issues and uses the precautionary approach in decision-making as issues arise through research, monitoring, evaluation and consultation. By the 3rd annual surveillance audit (around November 2021) demonstrate that this plan is being c…	Open	transparent
ISF Iceland Cod	Certified with component(s) in assessment	ISF Iceland Cod	Default Tree v2.0	2.2.3	Condition 5: Secondary Species Information	Atlantic cod Iceland Division Va	Cods, hakes, haddocks	Hooks And Lines - Longlines	ISF Iceland Cod fishery	Rationale _x000D_ _x000D_ Fulmar & Shags and cormorants (GN & LL); Northern gannet / / Great black-backed gull / Common guillemot (LL): _x000D_ The registration of seabirds caught in the MRI spring gillnet survey was initiated in 2009. The MRI spring gillnet survey is equivalent to 2% of the total cod-directed gillnet fishing effort in April. The first year’s the gillnet survey was only conducted…	Year 1 _x000D_ _x000D_ Data recording: Consult with the Directorate of Fisheries, the Marine Research Institute and/or other institutions to improve reporting in to the e-logbooks on both seabird bycatch and marine mammal interaction. _x000D_ Improvements: ISF will present an introduction of data and information being collected for the first year. _x000D_ Auditing: At the audit, ISF will present …	Year 1: There shall be evidence of the Clientâ€™s plan to encourage and enable fishing vessels to record all seabird bycatch in electronic logbook systems. Score 75 _x000D_ _x000D_ Year 2: By the end of Year 2 there shall be evidence that some quantitative information on of seabird bycatch is both available and adequate to assess the impact of the UoA on main secondary species with respect to the…	Open	reporting
ISF Iceland haddock	Certified	ISF Iceland haddock	Default Tree v2.0	2.2.3	Condition 5: Bycatch species information	Haddock Iceland ICES Va	Cods, hakes, haddocks	Hooks And Lines - Longlines	ISF Iceland haddock	Rationale _x000D_ _x000D_ Fulmar & Shags and cormorants (GN & LL); Northern gannet / / Great black-backed gull / Common guillemot (LL): _x000D_ The registration of seabirds caught in the MRI spring gillnet survey was initiated in 2009. The MRI spring gillnet survey is equivalent to 2% of the total cod-directed gillnet fishing effort in April. The first yearâ€™s the gillnet survey was only conduct…	Year 1 _x000D_ _x000D_ Data recording: Consult with the Directorate of Fisheries, the Marine Research Institute and/or other institutions to improve reporting in to the e-logbooks on both seabird bycatch and marine mammal interaction. _x000D_ _x000D_ Improvements: ISF will present an introduction of data and information being collected for the first year. _x000D_ _x000D_ Auditing: At the audit, I…	Year 1: There shall be evidence of the Clientâ€™s plan to encourage and enable fishing vessels to record all seabird bycatch in electronic logbook systems. Score 75 _x000D_ _x000D_ Year 2: By the end of Year 2 there shall be evidence that some quantitative information on of seabird bycatch is both available and adequate to assess the impact of the UoA on main secondary species with respect to the…	Open	reporting
ISF Iceland haddock	Certified	ISF Iceland haddock	Default Tree v2.0	2.2.3	Condition 5: Bycatch species information	Haddock Iceland ICES Va	Cods, hakes, haddocks	Gillnets And Entangling Nets - Gillnets	ISF Iceland haddock	Rationale _x000D_ _x000D_ Fulmar & Shags and cormorants (GN & LL); Northern gannet / / Great black-backed gull / Common guillemot (LL): _x000D_ The registration of seabirds caught in the MRI spring gillnet survey was initiated in 2009. The MRI spring gillnet survey is equivalent to 2% of the total cod-directed gillnet fishing effort in April. The first yearâ€™s the gillnet survey was only conduct…	Year 1 _x000D_ _x000D_ Data recording: Consult with the Directorate of Fisheries, the Marine Research Institute and/or other institutions to improve reporting in to the e-logbooks on both seabird bycatch and marine mammal interaction. _x000D_ _x000D_ Improvements: ISF will present an introduction of data and information being collected for the first year. _x000D_ _x000D_ Auditing: At the audit, I…	Year 1: There shall be evidence of the Clientâ€™s plan to encourage and enable fishing vessels to record all seabird bycatch in electronic logbook systems. Score 75 _x000D_ _x000D_ Year 2: By the end of Year 2 there shall be evidence that some quantitative information on of seabird bycatch is both available and adequate to assess the impact of the UoA on main secondary species with respect to the…	Open	reporting
Lake Peipus perch and pike-perch	Certified	Lake Peipus perch and pike-perch	Default Tree v2.0	1.2.4	Condition 4: Pike-perch Stock Status	Pikeperch-05, Lake Peipus	Miscellaneous freshwater fishes	Gillnets And Entangling Nets - Gillnets	Pike-perch	Rationale _x000D_ The assessment identifies major sources of uncertainty. The level of non-commercial and IUU catch and discard mortality is accounted for by applying a correction factor to the fishing mortality estimate. The ultimate values of non-commercial and IUU removals and discard mortality are determined by expert review of fishery scientists of both countries at joint ERFC, but the metho…	Client action plan _x000D_ _x000D_ Year 1. _x000D_ The Client, in consultations with Estonian Fishery Inspectorate, Ministry of Environment, Ministry of Rural Affairs and Estonian Marine Institute, develops a plan of survey aiming to describe of patterns and magnitude of recreational and illegal fishing of pike-perch in Peipus Lake, including discarding of juvenile pike-perch. The latest question…	Milestones _x000D_ _x000D_ Please note: Milestones here are similar or the same as those for Condition 3 _x000D_ _x000D_ Year 1:_x000D_ -Design a scientifically valid approach to determine the sources and amounts of pikeperch mortality associated with recreational and IUU fishing in Lake Peipus (including of juvenile by-catch and discarding) in the summer trapnet fishery that will aid in meeting …	Open	transparent
Russian Lake Peipus perch and pike-perch	Certified	Russian Lake Peipus perch and pike-perch	Default Tree v2.0	1.2.4	Condition 2: Assessment of Stock Status	European perch - 05, Lake Peipus	Miscellaneous freshwater fishes	Gillnets And Entangling Nets - Gillnets	UoC1: Perch Gillnets and trapnets	Rationale The assessment identifies major sources of uncertainty, including expert evaluations of volumes of recreational and IUU removals. They are used, in combination with commercial catch statistics, to establish the TAC. Estimation of the level of recreational fishing is based on questionnaires received from recreational fishers (responsibility of Federal Fishery Agency). Volumes of fish cau…	Year 1: _x000D_ The client, in consultation with the Pskov Department of Federal State Budgetary Scientific Establishment â€œBerg State Research Institute on Lake and River Fisheriesâ€ (FSBSI â€œGosNIORKhâ€), as well as with the department of state control, supervision and fish protection in the Pskov region, will develop a plan for assessing the volume of perch retained by amateur fishermen. T…	Please note: Milestones here are similar to those for Condition 1, and to Condition 2 of the certified Estonian Lake Peipus fishery (MC 2017), albeit that the timeline here is adjusted to allow for the later certification of the RLPPPF in comparison to the Estonian fishery. _x000D_ Year 1: Resulting score = 75. ? Design a scientifically valid approach to determine the sources and amounts of perch…	Open	illegal
Russian Lake Peipus perch and pike-perch	Certified	Russian Lake Peipus perch and pike-perch	Default Tree v2.0	1.2.4	Condition 2: Assessment of Stock Status	European perch - 05, Lake Peipus	Miscellaneous freshwater fishes	Seine Nets - Boat or vessel seines - Danish seines	UoC2: Perch Danish Seine	Rationale The assessment identifies major sources of uncertainty, including expert evaluations of volumes of recreational and IUU removals. They are used, in combination with commercial catch statistics, to establish the TAC. Estimation of the level of recreational fishing is based on questionnaires received from recreational fishers (responsibility of Federal Fishery Agency). Volumes of fish cau…	Year 1: _x000D_ The client, in consultation with the Pskov Department of Federal State Budgetary Scientific Establishment â€œBerg State Research Institute on Lake and River Fisheriesâ€ (FSBSI â€œGosNIORKhâ€), as well as with the department of state control, supervision and fish protection in the Pskov region, will develop a plan for assessing the volume of perch retained by amateur fishermen. T…	Please note: Milestones here are similar to those for Condition 1, and to Condition 2 of the certified Estonian Lake Peipus fishery (MC 2017), albeit that the timeline here is adjusted to allow for the later certification of the RLPPPF in comparison to the Estonian fishery. _x000D_ Year 1: Resulting score = 75. ? Design a scientifically valid approach to determine the sources and amounts of perch…	Open	illegal
Russian Lake Peipus perch and pike-perch	Certified	Russian Lake Peipus perch and pike-perch	Default Tree v2.0	1.2.4	Condition 2: Assessment of Stock Status	Pikeperch-05, Lake Peipus	Miscellaneous freshwater fishes	Gillnets And Entangling Nets - Gillnets	UoC3: Pike-Perch Gillnets and trapnets	Rationale The assessment identifies major sources of uncertainty, including expert evaluations of volumes of recreational and IUU removals. They are used, in combination with commercial catch statistics, to establish the TAC. Estimation of the level of recreational fishing is based on questionnaires received from recreational fishers (responsibility of Federal Fishery Agency). Volumes of fish cau…	Year 1: _x000D_ The client, in consultation with the Pskov Department of Federal State Budgetary Scientific Establishment â€œBerg State Research Institute on Lake and River Fisheriesâ€ (FSBSI â€œGosNIORKhâ€), as well as with the department of state control, supervision and fish protection in the Pskov region, will develop a plan for assessing the volume of perch retained by amateur fishermen. T…	Please note: Milestones here are similar to those for Condition 1, and to Condition 2 of the certified Estonian Lake Peipus fishery (MC 2017), albeit that the timeline here is adjusted to allow for the later certification of the RLPPPF in comparison to the Estonian fishery. _x000D_ Year 1: Resulting score = 75. ? Design a scientifically valid approach to determine the sources and amounts of perch…	Open	illegal
Russian Lake Peipus perch and pike-perch	Certified	Russian Lake Peipus perch and pike-perch	Default Tree v2.0	1.2.4	Condition 2: Assessment of Stock Status	Pikeperch-05, Lake Peipus	Miscellaneous freshwater fishes	Seine Nets - Boat or vessel seines - Danish seines	UoC4: Pike-Perch Danish Seine	Rationale The assessment identifies major sources of uncertainty, including expert evaluations of volumes of recreational and IUU removals. They are used, in combination with commercial catch statistics, to establish the TAC. Estimation of the level of recreational fishing is based on questionnaires received from recreational fishers (responsibility of Federal Fishery Agency). Volumes of fish cau…	Year 1: _x000D_ The client, in consultation with the Pskov Department of Federal State Budgetary Scientific Establishment â€œBerg State Research Institute on Lake and River Fisheriesâ€ (FSBSI â€œGosNIORKhâ€), as well as with the department of state control, supervision and fish protection in the Pskov region, will develop a plan for assessing the volume of perch retained by amateur fishermen. T…	Please note: Milestones here are similar to those for Condition 1, and to Condition 2 of the certified Estonian Lake Peipus fishery (MC 2017), albeit that the timeline here is adjusted to allow for the later certification of the RLPPPF in comparison to the Estonian fishery. _x000D_ Year 1: Resulting score = 75. ? Design a scientifically valid approach to determine the sources and amounts of perch…	Open	illegal
Russian Lake Peipus perch and pike-perch	Certified	Russian Lake Peipus perch and pike-perch	Default Tree v2.0	1.2.4	Condition 4: Assessment of the stock status	European perch - 05, Lake Peipus	Miscellaneous freshwater fishes	Gillnets And Entangling Nets - Gillnets	UoC1: Perch Gillnets and trapnets	Rationale The assessment identifies major sources of uncertainty, including expert evaluations of volumes of recreational and IUU removals. They are used, in combination with commercial catch statistics, to establish the TAC. Estimation of the level of recreational fishing is based on questionnaires received from recreational fishers (responsibility of Federal Fishery Agency). Volumes of fish cau…	Year 1: _x000D_ The client, with consultations with Pskov Department of Federal State Budgetary Scientific Establishment â€œBerg State Research Institute on Lake and River Fisheriesâ€ (FSBSI â€œGosNIORKhâ€), as well as with the department of state control, supervision and fish protection in the Pskov region, will develop a plan for assessing the volume of pike perch retained by amateur fisherme…	Please note: Milestones here are similar to those for Condition 3, and to Condition 4 of the certified Estonian Lake Peipus fishery (MC 2017), albeit that the timeline here is adjusted to allow for the later certification of the RLPPPF in comparison to the Estonian fishery. _x000D_ Year 1: Resulting score = 75. ? Design a scientifically valid approach to determine the sources and amounts of pike-…	Open	illegal
Russian Lake Peipus perch and pike-perch	Certified	Russian Lake Peipus perch and pike-perch	Default Tree v2.0	1.2.4	Condition 4: Assessment of the stock status	European perch - 05, Lake Peipus	Miscellaneous freshwater fishes	Seine Nets - Boat or vessel seines - Danish seines	UoC2: Perch Danish Seine	Rationale The assessment identifies major sources of uncertainty, including expert evaluations of volumes of recreational and IUU removals. They are used, in combination with commercial catch statistics, to establish the TAC. Estimation of the level of recreational fishing is based on questionnaires received from recreational fishers (responsibility of Federal Fishery Agency). Volumes of fish cau…	Year 1: _x000D_ The client, with consultations with Pskov Department of Federal State Budgetary Scientific Establishment â€œBerg State Research Institute on Lake and River Fisheriesâ€ (FSBSI â€œGosNIORKhâ€), as well as with the department of state control, supervision and fish protection in the Pskov region, will develop a plan for assessing the volume of pike perch retained by amateur fisherme…	Please note: Milestones here are similar to those for Condition 3, and to Condition 4 of the certified Estonian Lake Peipus fishery (MC 2017), albeit that the timeline here is adjusted to allow for the later certification of the RLPPPF in comparison to the Estonian fishery. _x000D_ Year 1: Resulting score = 75. ? Design a scientifically valid approach to determine the sources and amounts of pike-…	Open	illegal
Russian Lake Peipus perch and pike-perch	Certified	Russian Lake Peipus perch and pike-perch	Default Tree v2.0	1.2.4	Condition 4: Assessment of the stock status	Pikeperch-05, Lake Peipus	Miscellaneous freshwater fishes	Gillnets And Entangling Nets - Gillnets	UoC3: Pike-Perch Gillnets and trapnets	Rationale The assessment identifies major sources of uncertainty, including expert evaluations of volumes of recreational and IUU removals. They are used, in combination with commercial catch statistics, to establish the TAC. Estimation of the level of recreational fishing is based on questionnaires received from recreational fishers (responsibility of Federal Fishery Agency). Volumes of fish cau…	Year 1: _x000D_ The client, with consultations with Pskov Department of Federal State Budgetary Scientific Establishment â€œBerg State Research Institute on Lake and River Fisheriesâ€ (FSBSI â€œGosNIORKhâ€), as well as with the department of state control, supervision and fish protection in the Pskov region, will develop a plan for assessing the volume of pike perch retained by amateur fisherme…	Please note: Milestones here are similar to those for Condition 3, and to Condition 4 of the certified Estonian Lake Peipus fishery (MC 2017), albeit that the timeline here is adjusted to allow for the later certification of the RLPPPF in comparison to the Estonian fishery. _x000D_ Year 1: Resulting score = 75. ? Design a scientifically valid approach to determine the sources and amounts of pike-…	Open	illegal
Russian Lake Peipus perch and pike-perch	Certified	Russian Lake Peipus perch and pike-perch	Default Tree v2.0	1.2.4	Condition 4: Assessment of the stock status	Pikeperch-05, Lake Peipus	Miscellaneous freshwater fishes	Seine Nets - Boat or vessel seines - Danish seines	UoC4: Pike-Perch Danish Seine	Rationale The assessment identifies major sources of uncertainty, including expert evaluations of volumes of recreational and IUU removals. They are used, in combination with commercial catch statistics, to establish the TAC. Estimation of the level of recreational fishing is based on questionnaires received from recreational fishers (responsibility of Federal Fishery Agency). Volumes of fish cau…	Year 1: _x000D_ The client, with consultations with Pskov Department of Federal State Budgetary Scientific Establishment â€œBerg State Research Institute on Lake and River Fisheriesâ€ (FSBSI â€œGosNIORKhâ€), as well as with the department of state control, supervision and fish protection in the Pskov region, will develop a plan for assessing the volume of pike perch retained by amateur fisherme…	Please note: Milestones here are similar to those for Condition 3, and to Condition 4 of the certified Estonian Lake Peipus fishery (MC 2017), albeit that the timeline here is adjusted to allow for the later certification of the RLPPPF in comparison to the Estonian fishery. _x000D_ Year 1: Resulting score = 75. ? Design a scientifically valid approach to determine the sources and amounts of pike-…	Open	illegal
British Columbia salmon	Suspended	British Columbia Salmon	Default Tree v2.0 [Salmon]	1.2.4	Condition 2: 1.2.4 Assessment of stock status	Pink(=Humpback) salmon-British Columbia, North and Central Coast	Salmons, trouts, smelts	Seine Nets	Pink Salmon, North Coast, seine nets	Rationale _x000D_ Much of the assessment of SMU status for sockeye salmon, pink salmon, and chum salmon is based on unpublished documents provided to the Assessment Team by DFO and Bert Ionson (e.g., DFO 2015a, DFO and Ionson 2015a, Ionson 2016). These documents contain highly informative graphs but with little or no written description of data, methods, assumptions, results and discussion. Korma…	Year 1: Compile information to support status assessment and conduct preliminary analysis for sockeye, pink, and chum salmon._x000D_ _x000D_ Year 2: Complete CSAS Paper on methods of setting benchmarks in data limited populations with a focus on chum salmon (C. Holt). _x000D_ _x000D_ Year 3: DFO to apply process detailed in CSAS Paper and define benchmarks for each CU. _x000D_ _x000D_ Year 4: Wri…	Year 1: Develop and present a plan to address the condition (resulting score = 75). _x000D_ _x000D_ Year 2: Provide an update to show that the plan presented in Year 1 has been implemented (resulting score = 75). _x000D_ _x000D_ Year 3: Present initial results or partial results of the implemented plan (resulting score = 75). _x000D_ _x000D_ Year 4: Present the final results, and demonstrate the …	Open	transparent
British Columbia salmon	Suspended	British Columbia Salmon	Default Tree v2.0 [Salmon]	1.2.4	Condition 2: 1.2.4 Assessment of stock status	Pink(=Humpback) salmon-British Columbia, North and Central Coast	Salmons, trouts, smelts	Gillnets And Entangling Nets - Gillnets	Pink Salmon, North Coast, gillnets	Rationale _x000D_ Much of the assessment of SMU status for sockeye salmon, pink salmon, and chum salmon is based on unpublished documents provided to the Assessment Team by DFO and Bert Ionson (e.g., DFO 2015a, DFO and Ionson 2015a, Ionson 2016). These documents contain highly informative graphs but with little or no written description of data, methods, assumptions, results and discussion. Korma…	Year 1: Compile information to support status assessment and conduct preliminary analysis for sockeye, pink, and chum salmon._x000D_ _x000D_ Year 2: Complete CSAS Paper on methods of setting benchmarks in data limited populations with a focus on chum salmon (C. Holt). _x000D_ _x000D_ Year 3: DFO to apply process detailed in CSAS Paper and define benchmarks for each CU. _x000D_ _x000D_ Year 4: Wri…	Year 1: Develop and present a plan to address the condition (resulting score = 75). _x000D_ _x000D_ Year 2: Provide an update to show that the plan presented in Year 1 has been implemented (resulting score = 75). _x000D_ _x000D_ Year 3: Present initial results or partial results of the implemented plan (resulting score = 75). _x000D_ _x000D_ Year 4: Present the final results, and demonstrate the …	Open	transparent
British Columbia salmon	Suspended	British Columbia Salmon	Default Tree v2.0 [Salmon]	1.2.4	Condition 2: 1.2.4 Assessment of stock status	Pink(=Humpback) salmon-British Columbia, North and Central Coast	Salmons, trouts, smelts	Hooks And Lines - Trolling lines	Pink Salmon, North Coast, trolling lines	Rationale _x000D_ Much of the assessment of SMU status for sockeye salmon, pink salmon, and chum salmon is based on unpublished documents provided to the Assessment Team by DFO and Bert Ionson (e.g., DFO 2015a, DFO and Ionson 2015a, Ionson 2016). These documents contain highly informative graphs but with little or no written description of data, methods, assumptions, results and discussion. Korma…	Year 1: Compile information to support status assessment and conduct preliminary analysis for sockeye, pink, and chum salmon._x000D_ _x000D_ Year 2: Complete CSAS Paper on methods of setting benchmarks in data limited populations with a focus on chum salmon (C. Holt). _x000D_ _x000D_ Year 3: DFO to apply process detailed in CSAS Paper and define benchmarks for each CU. _x000D_ _x000D_ Year 4: Wri…	Year 1: Develop and present a plan to address the condition (resulting score = 75). _x000D_ _x000D_ Year 2: Provide an update to show that the plan presented in Year 1 has been implemented (resulting score = 75). _x000D_ _x000D_ Year 3: Present initial results or partial results of the implemented plan (resulting score = 75). _x000D_ _x000D_ Year 4: Present the final results, and demonstrate the …	Open	transparent
British Columbia salmon	Suspended	British Columbia Salmon	Default Tree v2.0 [Salmon]	1.2.4	Condition 2: 1.2.4 Assessment of stock status	Sockeye(=Red) salmon-British Columbia, Skeena	Salmons, trouts, smelts	Gillnets And Entangling Nets - Gillnets	Sockeye salmon, Skeena, gillnets	Rationale _x000D_ Much of the assessment of SMU status for sockeye salmon, pink salmon, and chum salmon is based on unpublished documents provided to the Assessment Team by DFO and Bert Ionson (e.g., DFO 2015a, DFO and Ionson 2015a, Ionson 2016). These documents contain highly informative graphs but with little or no written description of data, methods, assumptions, results and discussion. Korma…	Year 1: Compile information to support status assessment and conduct preliminary analysis for sockeye, pink, and chum salmon._x000D_ _x000D_ Year 2: Complete CSAS Paper on methods of setting benchmarks in data limited populations with a focus on chum salmon (C. Holt). _x000D_ _x000D_ Year 3: DFO to apply process detailed in CSAS Paper and define benchmarks for each CU. _x000D_ _x000D_ Year 4: Wri…	Year 1: Develop and present a plan to address the condition (resulting score = 75). _x000D_ _x000D_ Year 2: Provide an update to show that the plan presented in Year 1 has been implemented (resulting score = 75). _x000D_ _x000D_ Year 3: Present initial results or partial results of the implemented plan (resulting score = 75). _x000D_ _x000D_ Year 4: Present the final results, and demonstrate the …	Open	transparent
British Columbia salmon	Suspended	British Columbia Salmon	Default Tree v2.0 [Salmon]	1.2.4	Condition 2: 1.2.4 Assessment of stock status	Sockeye(=Red) salmon-British Columbia, Skeena	Salmons, trouts, smelts	Seine Nets	Sockeye salmon, Skeena, seine nets	Rationale _x000D_ Much of the assessment of SMU status for sockeye salmon, pink salmon, and chum salmon is based on unpublished documents provided to the Assessment Team by DFO and Bert Ionson (e.g., DFO 2015a, DFO and Ionson 2015a, Ionson 2016). These documents contain highly informative graphs but with little or no written description of data, methods, assumptions, results and discussion. Korma…	Year 1: Compile information to support status assessment and conduct preliminary analysis for sockeye, pink, and chum salmon._x000D_ _x000D_ Year 2: Complete CSAS Paper on methods of setting benchmarks in data limited populations with a focus on chum salmon (C. Holt). _x000D_ _x000D_ Year 3: DFO to apply process detailed in CSAS Paper and define benchmarks for each CU. _x000D_ _x000D_ Year 4: Wri…	Year 1: Develop and present a plan to address the condition (resulting score = 75). _x000D_ _x000D_ Year 2: Provide an update to show that the plan presented in Year 1 has been implemented (resulting score = 75). _x000D_ _x000D_ Year 3: Present initial results or partial results of the implemented plan (resulting score = 75). _x000D_ _x000D_ Year 4: Present the final results, and demonstrate the …	Open	transparent
British Columbia salmon	Suspended	British Columbia Salmon	Default Tree v2.0 [Salmon]	1.2.4	Condition 2: 1.2.4 Assessment of stock status	Chum(=keta=dog) salmon-67, North and Central Coast BC	Salmons, trouts, smelts	Gillnets And Entangling Nets - Gillnets	Chum Salmon, North Coast, gillnets	Rationale _x000D_ Much of the assessment of SMU status for sockeye salmon, pink salmon, and chum salmon is based on unpublished documents provided to the Assessment Team by DFO and Bert Ionson (e.g., DFO 2015a, DFO and Ionson 2015a, Ionson 2016). These documents contain highly informative graphs but with little or no written description of data, methods, assumptions, results and discussion. Korma…	Year 1: Compile information to support status assessment and conduct preliminary analysis for sockeye, pink, and chum salmon._x000D_ _x000D_ Year 2: Complete CSAS Paper on methods of setting benchmarks in data limited populations with a focus on chum salmon (C. Holt). _x000D_ _x000D_ Year 3: DFO to apply process detailed in CSAS Paper and define benchmarks for each CU. _x000D_ _x000D_ Year 4: Wri…	Year 1: Develop and present a plan to address the condition (resulting score = 75). _x000D_ _x000D_ Year 2: Provide an update to show that the plan presented in Year 1 has been implemented (resulting score = 75). _x000D_ _x000D_ Year 3: Present initial results or partial results of the implemented plan (resulting score = 75). _x000D_ _x000D_ Year 4: Present the final results, and demonstrate the …	Open	transparent
British Columbia salmon	Suspended	British Columbia Salmon	Default Tree v2.0 [Salmon]	1.2.4	Condition 2: 1.2.4 Assessment of stock status	Chum(=keta=dog) salmon-67, North and Central Coast BC	Salmons, trouts, smelts	Hooks And Lines - Trolling lines	Chum Salmon, North Coast, trolling lines	Rationale _x000D_ Much of the assessment of SMU status for sockeye salmon, pink salmon, and chum salmon is based on unpublished documents provided to the Assessment Team by DFO and Bert Ionson (e.g., DFO 2015a, DFO and Ionson 2015a, Ionson 2016). These documents contain highly informative graphs but with little or no written description of data, methods, assumptions, results and discussion. Korma…	Year 1: Compile information to support status assessment and conduct preliminary analysis for sockeye, pink, and chum salmon._x000D_ _x000D_ Year 2: Complete CSAS Paper on methods of setting benchmarks in data limited populations with a focus on chum salmon (C. Holt). _x000D_ _x000D_ Year 3: DFO to apply process detailed in CSAS Paper and define benchmarks for each CU. _x000D_ _x000D_ Year 4: Wri…	Year 1: Develop and present a plan to address the condition (resulting score = 75). _x000D_ _x000D_ Year 2: Provide an update to show that the plan presented in Year 1 has been implemented (resulting score = 75). _x000D_ _x000D_ Year 3: Present initial results or partial results of the implemented plan (resulting score = 75). _x000D_ _x000D_ Year 4: Present the final results, and demonstrate the …	Open	transparent
British Columbia salmon	Suspended	British Columbia Salmon	Default Tree v2.0 [Salmon]	1.2.4	Condition 2: 1.2.4 Assessment of stock status	Chum(=keta=dog) salmon-67, North and Central Coast BC	Salmons, trouts, smelts	Seine Nets	Chum Salmon, North Coast, seine nets	Rationale _x000D_ Much of the assessment of SMU status for sockeye salmon, pink salmon, and chum salmon is based on unpublished documents provided to the Assessment Team by DFO and Bert Ionson (e.g., DFO 2015a, DFO and Ionson 2015a, Ionson 2016). These documents contain highly informative graphs but with little or no written description of data, methods, assumptions, results and discussion. Korma…	Year 1: Compile information to support status assessment and conduct preliminary analysis for sockeye, pink, and chum salmon._x000D_ _x000D_ Year 2: Complete CSAS Paper on methods of setting benchmarks in data limited populations with a focus on chum salmon (C. Holt). _x000D_ _x000D_ Year 3: DFO to apply process detailed in CSAS Paper and define benchmarks for each CU. _x000D_ _x000D_ Year 4: Wri…	Year 1: Develop and present a plan to address the condition (resulting score = 75). _x000D_ _x000D_ Year 2: Provide an update to show that the plan presented in Year 1 has been implemented (resulting score = 75). _x000D_ _x000D_ Year 3: Present initial results or partial results of the implemented plan (resulting score = 75). _x000D_ _x000D_ Year 4: Present the final results, and demonstrate the …	Open	transparent
British Columbia salmon	Suspended	British Columbia Salmon	Default Tree v2.0 [Salmon]	1.2.4	Condition 2: 1.2.4 Assessment of stock status	Sockeye(=Red) salmon-67, North and Central Coast BC-67	Salmons, trouts, smelts	Gillnets And Entangling Nets - Gillnets	Sockeye salmon, Nass, gillnets	Rationale _x000D_ Much of the assessment of SMU status for sockeye salmon, pink salmon, and chum salmon is based on unpublished documents provided to the Assessment Team by DFO and Bert Ionson (e.g., DFO 2015a, DFO and Ionson 2015a, Ionson 2016). These documents contain highly informative graphs but with little or no written description of data, methods, assumptions, results and discussion. Korma…	Year 1: Compile information to support status assessment and conduct preliminary analysis for sockeye, pink, and chum salmon._x000D_ _x000D_ Year 2: Complete CSAS Paper on methods of setting benchmarks in data limited populations with a focus on chum salmon (C. Holt). _x000D_ _x000D_ Year 3: DFO to apply process detailed in CSAS Paper and define benchmarks for each CU. _x000D_ _x000D_ Year 4: Wri…	Year 1: Develop and present a plan to address the condition (resulting score = 75). _x000D_ _x000D_ Year 2: Provide an update to show that the plan presented in Year 1 has been implemented (resulting score = 75). _x000D_ _x000D_ Year 3: Present initial results or partial results of the implemented plan (resulting score = 75). _x000D_ _x000D_ Year 4: Present the final results, and demonstrate the …	Open	transparent
British Columbia salmon	Suspended	British Columbia Salmon	Default Tree v2.0 [Salmon]	1.2.4	Condition 2: 1.2.4 Assessment of stock status	Sockeye(=Red) salmon-67, North and Central Coast BC-67	Salmons, trouts, smelts	Seine Nets	Sockeye salmon, Nass, seine nets	Rationale _x000D_ Much of the assessment of SMU status for sockeye salmon, pink salmon, and chum salmon is based on unpublished documents provided to the Assessment Team by DFO and Bert Ionson (e.g., DFO 2015a, DFO and Ionson 2015a, Ionson 2016). These documents contain highly informative graphs but with little or no written description of data, methods, assumptions, results and discussion. Korma…	Year 1: Compile information to support status assessment and conduct preliminary analysis for sockeye, pink, and chum salmon._x000D_ _x000D_ Year 2: Complete CSAS Paper on methods of setting benchmarks in data limited populations with a focus on chum salmon (C. Holt). _x000D_ _x000D_ Year 3: DFO to apply process detailed in CSAS Paper and define benchmarks for each CU. _x000D_ _x000D_ Year 4: Wri…	Year 1: Develop and present a plan to address the condition (resulting score = 75). _x000D_ _x000D_ Year 2: Provide an update to show that the plan presented in Year 1 has been implemented (resulting score = 75). _x000D_ _x000D_ Year 3: Present initial results or partial results of the implemented plan (resulting score = 75). _x000D_ _x000D_ Year 4: Present the final results, and demonstrate the …	Open	transparent
ISF Greenland halibut	Certified	ISF Greenland halibut	Default Tree v2.0	2.2.3	Condition 4: Secondary Species Information	Greenland halibut, ICES Divisions 5a, 14 and 12a3	Flounders, halibuts, soles	Hooks And Lines - Longlines	Greenland halibut within Icelandic EEZ	Rationale _x000D_ _x000D_ Fulmar & Shags and cormorants (GN & LL); Northern gannet / Great black-backed gull / Common guillemot (LL): The registration of seabirds caught in the MRI spring gillnet survey was initiated in 2009. The MRI spring gillnet survey is equivalent to 2% of the total cod-directed gillnet fishing effort in April. The first yearâ€™s the gillnet survey was only conducted in the …	Year 1 _x000D_ _x000D_ Data recording: Consult with the Directorate of Fisheries, the Marine Research Institute and/or other institutions to improve reporting in to the e-logbooks on both seabird bycatch and marine mammal interaction. _x000D_ Improvements: ISF will present an introduction of data and information being collected for the first year. _x000D_ Auditing: At the audit, ISF will present …	Year 1: There shall be evidence of the Clientâ€™s plan to encourage and enable fishing vessels to record all seabird bycatch in electronic logbook systems. Score 75 _x000D_ _x000D_ Year 2: By the end of Year 2 there shall be evidence that some quantitative information on of seabird bycatch is both available and adequate to assess the impact of the UoA on main secondary species with respect to the…	Open	reporting
ISF Greenland halibut	Certified	ISF Greenland halibut	Default Tree v2.0	2.2.3	Condition 4: Secondary Species Information	Greenland halibut, ICES Divisions 5a, 14 and 12a3	Flounders, halibuts, soles	Gillnets And Entangling Nets - Gillnets	Greenland halibut within Icelandic EEZ	Rationale _x000D_ _x000D_ Fulmar & Shags and cormorants (GN & LL); Northern gannet / Great black-backed gull / Common guillemot (LL): The registration of seabirds caught in the MRI spring gillnet survey was initiated in 2009. The MRI spring gillnet survey is equivalent to 2% of the total cod-directed gillnet fishing effort in April. The first yearâ€™s the gillnet survey was only conducted in the …	Year 1 _x000D_ _x000D_ Data recording: Consult with the Directorate of Fisheries, the Marine Research Institute and/or other institutions to improve reporting in to the e-logbooks on both seabird bycatch and marine mammal interaction. _x000D_ Improvements: ISF will present an introduction of data and information being collected for the first year. _x000D_ Auditing: At the audit, ISF will present …	Year 1: There shall be evidence of the Clientâ€™s plan to encourage and enable fishing vessels to record all seabird bycatch in electronic logbook systems. Score 75 _x000D_ _x000D_ Year 2: By the end of Year 2 there shall be evidence that some quantitative information on of seabird bycatch is both available and adequate to assess the impact of the UoA on main secondary species with respect to the…	Open	reporting
Maldives pole & line skipjack tuna	Certified	Maldives pole & line tuna	Default Tree v2.0	3.2.3	Condition 1: Monitoring, Control and Surveillance	Skipjack Tuna Indian Ocean	Tunas, bonitos, billfishes	Hooks And Lines - Handlines and pole-lines (mechanized)	Pole and Line skipjack	Rationale _x000D_ _x000D_ Several vessels failed to report the logbook catch data to the Ministry as required by the Licensing Regulation. Many of the vessels in this fishery did not have logbooks on-board. It is a requirement that all fishing vessels are subject to a data recording system and this involves a logbook being completed by the Master of the Fishing vessel. The recordings contained in…	To achieve this condition, in the first year, the Ministry of Fisheries and Agriculture through collaboration of the Client, MSPEA and its members, will re-iterate and communicate to all fishing vessel owners of the fisheries regulation requirement of keeping logbooks on board the vessel. The circular would also refer to the responsibility of recording catch and fishing effort information as per …	1st surveillance: _x000D_ Evidence that the vessels owners have been informed of the requirement to carry log books, or other reporting methods to comply with Maldivian reporting requirements, on all vessels and for them to be completed by the Master and reports provided to the Ministry. It is not anticipated that any re-scoring will take place at the first surveillance. _x000D_ _x000D_ 2nd surve…	Open	MCS
North Sea Brown Shrimp	Certified	North Sea Brown Shrimp	Default Tree v2.0	3.2.3	Condition 6: Compliance enforcement	Common shrimp-North Sea, ICES IV a,b,c	Shrimps, prawns	Trawls - Bottom trawls - beam trawls	North Sea Brown Shrimp	Rationale _x000D_ _x000D_ SI (a) SG 80 - A monitoring, control and surveillance system has been implemented in the fishery and has demonstrated an ability to enforce relevant management measures, strategies and/or rules. _x000D_ _x000D_ A monitoring, control and surveillance (MCS) system has been implemented in the fishery through national administrations and also through the implementation of th…	Client action plan _x000D_ _x000D_ The Group is convinced that independent enforcement of the Management Plan is necessary to ensure compliance across all 400 vessels. The Management Plan also sets specific targets for the level of controls for each type of inspection (vessel, sieving station, PO). _x000D_ _x000D_ To further strengthen the credibility of the control system, the Group will contrac…	Milestones _x000D_ _x000D_ SI (a) SG80 - A monitoring, control and surveillance system has been implemented in the fishery and has demonstrated an ability to enforce relevant management measures, strategies and/or rules. _x000D_ SI (b) SG80 - Sanctions to deal with non-compliance exist, are consistently applied and thought to provide effective deterrence. _x000D_ SI (c) SG80 - Some evidence exist…	Open	MCS
ISF Iceland anglerfish	Certified	ISF Iceland anglerfish	Default Tree v2.0	2.2.3	Condition 4: Secondary Species Information (Gillnets; Anglerfish gillnets; Longlines)	Anglerfish-Iceland, ICES Subarea 5a	Miscellaneous demersal fishes	Gillnets And Entangling Nets - Gillnets	UoA5: Anglerfish gillnet (GA)	Rationale _x000D_ _x000D_ Logbook returns have been poor, and variations in estimated numbers of bycatch species evident in the most recent data provided by the MFRI indicate that the available information may not be accurate and verifiable for all bycatch species, including for the main secondary species being considered in the present assessment. The quantitative information available is thus n…	Client action plan _x000D_ _x000D_ _x000D_ Year 1 _x000D_ _x000D_ Data recording: Consult with the Directorate of Fisheries, the Marine Research Institute and/or other institutions to improve reporting in to the e-logbooks on both seabird bycatch and marine mammal interaction. _x000D_ _x000D_ Improvements: ISF will present an introduction of data and information being collected for the first year…	Milestones _x000D_ _x000D_ Year 1: There shall be evidence of the Clientâ€™s plan to encourage and enable fishing vessels to record all seabird and marine mammal bycatch in electronic logbook systems. Score 75 _x000D_ _x000D_ Year 2: By the end of Year 2 there shall be evidence that some quantitative information on of seabird and marine mammal bycatch is both available and adequate to assess the …	Open	reporting
ISF Iceland anglerfish	Certified	ISF Iceland anglerfish	Default Tree v2.0	2.2.3	Condition 4: Secondary Species Information (Gillnets; Anglerfish gillnets; Longlines)	Anglerfish-Iceland, ICES Subarea 5a	Miscellaneous demersal fishes	Gillnets And Entangling Nets - Gillnets	UoA4: Gillnet (GN)	Rationale _x000D_ _x000D_ Logbook returns have been poor, and variations in estimated numbers of bycatch species evident in the most recent data provided by the MFRI indicate that the available information may not be accurate and verifiable for all bycatch species, including for the main secondary species being considered in the present assessment. The quantitative information available is thus n…	Client action plan _x000D_ _x000D_ _x000D_ Year 1 _x000D_ _x000D_ Data recording: Consult with the Directorate of Fisheries, the Marine Research Institute and/or other institutions to improve reporting in to the e-logbooks on both seabird bycatch and marine mammal interaction. _x000D_ _x000D_ Improvements: ISF will present an introduction of data and information being collected for the first year…	Milestones _x000D_ _x000D_ Year 1: There shall be evidence of the Clientâ€™s plan to encourage and enable fishing vessels to record all seabird and marine mammal bycatch in electronic logbook systems. Score 75 _x000D_ _x000D_ Year 2: By the end of Year 2 there shall be evidence that some quantitative information on of seabird and marine mammal bycatch is both available and adequate to assess the …	Open	reporting
ISF Iceland anglerfish	Certified	ISF Iceland anglerfish	Default Tree v2.0	2.2.3	Condition 4: Secondary Species Information (Gillnets; Anglerfish gillnets; Longlines)	Anglerfish-Iceland, ICES Subarea 5a	Miscellaneous demersal fishes	Hooks And Lines - Longlines	UoA7: Longline (LL)	Rationale _x000D_ _x000D_ Logbook returns have been poor, and variations in estimated numbers of bycatch species evident in the most recent data provided by the MFRI indicate that the available information may not be accurate and verifiable for all bycatch species, including for the main secondary species being considered in the present assessment. The quantitative information available is thus n…	Client action plan _x000D_ _x000D_ _x000D_ Year 1 _x000D_ _x000D_ Data recording: Consult with the Directorate of Fisheries, the Marine Research Institute and/or other institutions to improve reporting in to the e-logbooks on both seabird bycatch and marine mammal interaction. _x000D_ _x000D_ Improvements: ISF will present an introduction of data and information being collected for the first year…	Milestones _x000D_ _x000D_ Year 1: There shall be evidence of the Clientâ€™s plan to encourage and enable fishing vessels to record all seabird and marine mammal bycatch in electronic logbook systems. Score 75 _x000D_ _x000D_ Year 2: By the end of Year 2 there shall be evidence that some quantitative information on of seabird and marine mammal bycatch is both available and adequate to assess the …	Open	reporting
ISF Iceland anglerfish	Certified	ISF Iceland anglerfish	Default Tree v2.0	2.3.3	Condition 6: ETP Species Information (Gillnets; Anglerfish gillnets; Longlines)	Anglerfish-Iceland, ICES Subarea 5a	Miscellaneous demersal fishes	Gillnets And Entangling Nets - Gillnets	UoA5: Anglerfish gillnet (GA)	_x000D_ Rationale _x000D_ _x000D_ Cod gillnets, longlines _x000D_ Logbook returns have been poor, and variations in estimated numbers of bycatch species evident in the most recent data provided by the MFRI indicate that the available information may not be accurate and verifiable for all bycatch species, including for the ETP species being considered in the present assessment. The low number of t…	Client action plan _x000D_ _x000D_ _x000D_ Year 1 _x000D_ _x000D_ Data recording: Consult with the Directorate of Fisheries, the Marine Research Institute and/or other institutions to improve reporting in to the e-logbooks on both seabird and marine mammal bycatch. _x000D_ _x000D_ Improvements: ISF will present an introduction of data and information being collected for the first year. _x000D_ _x…	Milestones _x000D_ _x000D_ Year 1: There shall be evidence of the Clientâ€™s plan to encourage and enable fishing vessels to record all seabird and marine mammal bycatch in electronic logbook systems. Score 75 _x000D_ _x000D_ Year 2: By the end of Year 2 there shall be evidence that some quantitative information on of seabird and marine mammal bycatch is both available and adequate to assess the …	Open	reporting
ISF Iceland anglerfish	Certified	ISF Iceland anglerfish	Default Tree v2.0	2.3.3	Condition 6: ETP Species Information (Gillnets; Anglerfish gillnets; Longlines)	Anglerfish-Iceland, ICES Subarea 5a	Miscellaneous demersal fishes	Gillnets And Entangling Nets - Gillnets	UoA4: Gillnet (GN)	_x000D_ Rationale _x000D_ _x000D_ Cod gillnets, longlines _x000D_ Logbook returns have been poor, and variations in estimated numbers of bycatch species evident in the most recent data provided by the MFRI indicate that the available information may not be accurate and verifiable for all bycatch species, including for the ETP species being considered in the present assessment. The low number of t…	Client action plan _x000D_ _x000D_ _x000D_ Year 1 _x000D_ _x000D_ Data recording: Consult with the Directorate of Fisheries, the Marine Research Institute and/or other institutions to improve reporting in to the e-logbooks on both seabird and marine mammal bycatch. _x000D_ _x000D_ Improvements: ISF will present an introduction of data and information being collected for the first year. _x000D_ _x…	Milestones _x000D_ _x000D_ Year 1: There shall be evidence of the Clientâ€™s plan to encourage and enable fishing vessels to record all seabird and marine mammal bycatch in electronic logbook systems. Score 75 _x000D_ _x000D_ Year 2: By the end of Year 2 there shall be evidence that some quantitative information on of seabird and marine mammal bycatch is both available and adequate to assess the …	Open	reporting
ISF Iceland anglerfish	Certified	ISF Iceland anglerfish	Default Tree v2.0	2.3.3	Condition 6: ETP Species Information (Gillnets; Anglerfish gillnets; Longlines)	Anglerfish-Iceland, ICES Subarea 5a	Miscellaneous demersal fishes	Hooks And Lines - Longlines	UoA7: Longline (LL)	_x000D_ Rationale _x000D_ _x000D_ Cod gillnets, longlines _x000D_ Logbook returns have been poor, and variations in estimated numbers of bycatch species evident in the most recent data provided by the MFRI indicate that the available information may not be accurate and verifiable for all bycatch species, including for the ETP species being considered in the present assessment. The low number of t…	Client action plan _x000D_ _x000D_ _x000D_ Year 1 _x000D_ _x000D_ Data recording: Consult with the Directorate of Fisheries, the Marine Research Institute and/or other institutions to improve reporting in to the e-logbooks on both seabird and marine mammal bycatch. _x000D_ _x000D_ Improvements: ISF will present an introduction of data and information being collected for the first year. _x000D_ _x…	Milestones _x000D_ _x000D_ Year 1: There shall be evidence of the Clientâ€™s plan to encourage and enable fishing vessels to record all seabird and marine mammal bycatch in electronic logbook systems. Score 75 _x000D_ _x000D_ Year 2: By the end of Year 2 there shall be evidence that some quantitative information on of seabird and marine mammal bycatch is both available and adequate to assess the …	Open	reporting
ISF Iceland anglerfish	Certified	ISF Iceland anglerfish	Default Tree v2.0	2.2.3	Condition 3: Secondary Species Information (Lumpfish gillnets)	Anglerfish-Iceland, ICES Subarea 5a	Miscellaneous demersal fishes	Gillnets And Entangling Nets - Gillnets	UoA6: Lumpfish gillnet (GL)	Rationale _x000D_ _x000D_ Some quantitative information on bycatch rates of main secondary species (out-ofscope marine mammal and seabird species in the present assessment) is available, as is information on the status of marine mammal and seabird species. SG 60 is thus met. _x000D_ _x000D_ However logbook returns have been poor, and variations in estimated numbers of bycatch species evident in t…		Milestones _x000D_ _x000D_ Year 1: There shall be evidence of the Clientâ€™s plan to encourage and enable fishing vessels to record all seabird and marine mammal bycatch in electronic logbook systems. Score 75 _x000D_ _x000D_ Year 2: By the end of Year 2 there shall be evidence that some quantitative information on of seabird and marine mammal bycatch is both available and adequate to assess the …	Open	reporting
ISF Iceland anglerfish	Certified	ISF Iceland anglerfish	Default Tree v2.0	2.3.3	Condition 6: ETP Species Information (Lumpfish gillnets)	Anglerfish-Iceland, ICES Subarea 5a	Miscellaneous demersal fishes	Gillnets And Entangling Nets - Gillnets	UoA6: Lumpfish gillnet (GL)	Rationale _x000D_ _x000D_ Some quantitative information on bycatch rates of ETP marine mammal and seabird species is thus available. SG 60 is thus met. However logbook returns have been poor, and variations in estimated numbers of bycatch species evident in the most recent data provided by the MFRI indicate that the available information may not be accurate and verifiable for all bycatch species,…		Milestones _x000D_ _x000D_ Year 1: There shall be evidence of the Clientâ€™s plan to encourage and enable fishing vessels to record all seabird and marine mammal bycatch in electronic logbook systems. Score 75 _x000D_ _x000D_ Year 2: By the end of Year 2 there shall be evidence that some quantitative information on of seabird and marine mammal bycatch is both available and adequate to assess the …	Open	reporting
The Poole Harbour Clam & Cockle Fishery	Certified	The Poole Harbour Clam & Cockle Fishery	Default Tree v2.0	2.3.3	Condition 2: ETP Information	Common cockle-Poole Harbour	Clams, cockles, arkshells	Dredges - Boat dredges	Southern IFCA Poole Harbour. Gear: Pump and scoop dredge.	UoA1 and UoA2: Full compliance with fishery management regulations by fishers appears to occur (according to SIFCA) and there were no reported interactions with ETP species described by fishers or fisheries officers at the time of the site visit. Therefore SG60 is met. The nature of the dredge operations means that direct contact with ETP bird species is highly unlikely. There are no records of E…	The client fishery will create a template for recording any interactions between the fishery and ETP species. This will be undertaken by, in the first instance, looking at the type of data that will need to be collected and how best this data can be incorporated into a recording form and submitted to the management authority, the Southern IFCA. This initial phase will be carried out in consultati…	Annual surveillance 1: Show written evidence of consultation with permit holders to agree that any interaction with ETP species should be recorded and passed on to management authorities for analysis. Expected interim score: 70 _x000D_ _x000D_ Annual surveillance 2: Provide evidence that a ETP interaction return form has been designed and implemented within the management plan. Expected interim s…	Closed	reporting
The Poole Harbour Clam & Cockle Fishery	Certified	The Poole Harbour Clam & Cockle Fishery	Default Tree v2.0	2.3.3	Condition 2: ETP Information	Manila clam-Poole harbour	Clams, cockles, arkshells	Dredges - Boat dredges	Southern IFCA Poole Harbour. Gear: Pump and scoop dredge.	UoA1 and UoA2: Full compliance with fishery management regulations by fishers appears to occur (according to SIFCA) and there were no reported interactions with ETP species described by fishers or fisheries officers at the time of the site visit. Therefore SG60 is met. The nature of the dredge operations means that direct contact with ETP bird species is highly unlikely. There are no records of E…	The client fishery will create a template for recording any interactions between the fishery and ETP species. This will be undertaken by, in the first instance, looking at the type of data that will need to be collected and how best this data can be incorporated into a recording form and submitted to the management authority, the Southern IFCA. This initial phase will be carried out in consultati…	Annual surveillance 1: Show written evidence of consultation with permit holders to agree that any interaction with ETP species should be recorded and passed on to management authorities for analysis. Expected interim score: 70 _x000D_ _x000D_ Annual surveillance 2: Provide evidence that a ETP interaction return form has been designed and implemented within the management plan. Expected interim s…	Closed	reporting
WPSTA Western and Central Pacific skipjack and yellowfin free school purse seine	Certified	WPSTA Western and Central Pacific skipjack and yellowfin free school purse seine	Default Tree v2.0	2.2.2	Condition 5: Secondary species management strategy	Yellowfin tuna Central Western Pacific	Tunas, bonitos, billfishes	Surrounding Nets - With purse lines (purse seines)	Yellowfin, China - purse seine, free School (unassociated) sets only	WCPFC and all three national jurisdictions have prohibitions on shark finning as detailed in the background. Data for the Chinese Taipei vessels (Table 13) indicate that shark finning events have been very infrequent and none have been recorded since 2012. There are also very few instances of shark finning reported by observers from the high levels of observer coverage for USA purse seine vessels…	General approach _x000D_ Shark finning (with discarding of the carcass) is not permitted in this fishery under WCPFC CMM 2010-07 (transposed into Chinese law based on Article 23 of the Fisheries Law of the PRC; further CMMs on this subject shall be transferred into Chinese law on the same basis). One missing element resulting in the scoring of this PI <80 is that there is a lack of clear evidence…	Year 1(2019): Evidence recorded by observer and provided through SPC clearly demonstrates that there is highly unlikely that the shark finning is taking place in UoC China fleets from year 2014 to 2017. Score 75 _x000D_ _x000D_ Year 2(2020): Evidence recorded by observer and provided through SPC clearly demonstrates that there is highly unlikely the shark finning is taking place in UoC China flee…	Open	reporting
WPSTA Western and Central Pacific skipjack and yellowfin free school purse seine	Certified	WPSTA Western and Central Pacific skipjack and yellowfin free school purse seine	Default Tree v2.0	2.2.2	Condition 5: Secondary species management strategy	Skipjack tuna Central Western Pacific	Tunas, bonitos, billfishes	Surrounding Nets - With purse lines (purse seines)	Skipjack, China - purse seine, free School (or unassociated) sets only	WCPFC and all three national jurisdictions have prohibitions on shark finning as detailed in the background. Data for the Chinese Taipei vessels (Table 13) indicate that shark finning events have been very infrequent and none have been recorded since 2012. There are also very few instances of shark finning reported by observers from the high levels of observer coverage for USA purse seine vessels…	General approach _x000D_ Shark finning (with discarding of the carcass) is not permitted in this fishery under WCPFC CMM 2010-07 (transposed into Chinese law based on Article 23 of the Fisheries Law of the PRC; further CMMs on this subject shall be transferred into Chinese law on the same basis). One missing element resulting in the scoring of this PI <80 is that there is a lack of clear evidence…	Year 1(2019): Evidence recorded by observer and provided through SPC clearly demonstrates that there is highly unlikely that the shark finning is taking place in UoC China fleets from year 2014 to 2017. Score 75 _x000D_ _x000D_ Year 2(2020): Evidence recorded by observer and provided through SPC clearly demonstrates that there is highly unlikely the shark finning is taking place in UoC China flee…	Open	reporting
WPSTA Western and Central Pacific skipjack and yellowfin free school purse seine	Certified	WPSTA Western and Central Pacific skipjack and yellowfin free school purse seine	Default Tree v2.0	2.2.2	Condition 6: Secondary species management	Skipjack tuna Central Western Pacific	Tunas, bonitos, billfishes	Surrounding Nets - With purse lines (purse seines)	Skipjack, Chinese Taipei - purse seine, free School (unassociated) sets only	WCPFC and all three national jurisdictions have prohibitions on shark finning as detailed in the background. Data for the Chinese Taipei vessels (Table 13) indicate that shark finning events have been very infrequent and none have been recorded since 2012. There are also very few instances of shark finning reported by observers from the high levels of observer coverage for USA purse seine vessels…	General approach _x000D_ Shark finning (with discarding of the carcass) is not permitted in this UoA, not only under WCPFC CMM 2010-07 but also at national level, where there are in place stricter measures than WCPFC which require that shark fins be landed naturally attached to the carcass, but only at domestic ports (not at land-based transshipment hubs in distant waters). At present, a greater …	Year 1(2019): Observer record provided through SPC to WPSTA with assistance of TFA clearly demonstrates that there is highly unlikely the shark finning is taking place in UoC Chinese Taipei fleets for year 2017. Score 75. _x000D_ _x000D_ Year 2(2020): Observer record provided through SPC to WPSTA with assistance of TFA clearly demonstrates that there is highly unlikely the shark finning is taking…	Open	reporting
WPSTA Western and Central Pacific skipjack and yellowfin free school purse seine	Certified	WPSTA Western and Central Pacific skipjack and yellowfin free school purse seine	Default Tree v2.0	2.2.2	Condition 6: Secondary species management	Yellowfin tuna Central Western Pacific	Tunas, bonitos, billfishes	Surrounding Nets - With purse lines (purse seines)	Yellowfin, China Taipei - purse seine, free School (unassociated) sets only	WCPFC and all three national jurisdictions have prohibitions on shark finning as detailed in the background. Data for the Chinese Taipei vessels (Table 13) indicate that shark finning events have been very infrequent and none have been recorded since 2012. There are also very few instances of shark finning reported by observers from the high levels of observer coverage for USA purse seine vessels…	General approach _x000D_ Shark finning (with discarding of the carcass) is not permitted in this UoA, not only under WCPFC CMM 2010-07 but also at national level, where there are in place stricter measures than WCPFC which require that shark fins be landed naturally attached to the carcass, but only at domestic ports (not at land-based transshipment hubs in distant waters). At present, a greater …	Year 1(2019): Observer record provided through SPC to WPSTA with assistance of TFA clearly demonstrates that there is highly unlikely the shark finning is taking place in UoC Chinese Taipei fleets for year 2017. Score 75. _x000D_ _x000D_ Year 2(2020): Observer record provided through SPC to WPSTA with assistance of TFA clearly demonstrates that there is highly unlikely the shark finning is taking…	Open	reporting
Alaska salmon	Certified	Alaska salmon	Default Tree v2.0 [Salmon]	3.2.2	Condition 9: Decision making	Sockeye(=Red) salmon-SE Alaska	Salmons, trouts, smelts	Gillnets And Entangling Nets - Driftnets	SEAK	While ADFG decision-making processes are generally responsive to serious issues identified through research, monitoring, evaluation and consultation, it is not clear that they do so for all Ã¢â‚¬Å“serious and other important issuesÃ¢â‚¬Â as required by SG80 scoring issue B. New information presented by stakeholders regarding specific important issues (e.g. straying of chum salmon into West Crawf…	AFDF ACTION: AFDF will work with ADFG and NSRAA to document evidence of actions taken in response to new and unexpected information related to LCI and WCI hatchery strays. Additionally, AFDF will report on ADFGÃ¢â‚¬â„¢s progress towards implementation of the proposal presented at the March 7th, 2020 BOF Hatchery Committee Meeting, which outlined a third-party convening of a working group of agenc…	By the 2nd annual surveillance (around November 2020) demonstrate that a plan is in place to ensure the management system can respond to serious and other important issues and uses the precautionary approach in decision-making as issues arise through research, monitoring, evaluation and consultation. By the 3rd annual surveillance audit (around November 2021) demonstrate that this plan is being c…	Open	transparent
PNA Western and Central Pacific skipjack, yellowfin and bigeye tuna purse seine fishery (FAD and non-FAD sets)	Certified with component(s) in assessment	PNA Western and Central Pacific skipjack and yellowfin, unassociated / non FAD set, tuna purse seine	Default Tree v2.0	2.3.2	Condition 5: Recovery of ETP species (PNA)	Skipjack tuna Central Western Pacific	Tunas, bonitos, billfishes	Surrounding Nets - With purse lines (purse seines)	Skipjack tuna, purse seine targeting free schools	Observer data indicate that the number interactions between the PNAFTF and Manta and devil rays has averaged 634 animals annually over the period 20112015 (PNAO, pers. comm.). It is not clear to what extent Manta and devil rays are retained in the PNAFTF, but retention generally seems unlikely. Croll et al. (2015 noted that while extrapolated from limited observer data, the relatively high mobuli…	Client action plan _x000D_ _x000D_ By Year 1-2018 PNA will: Promote the collection of data on manta and devil rays as part of the PIRFO observer programme, including action taken and state of the species; and will make a request to SPC to undertake a literature review on the mortality to manta and devil rays when returned to sea. _x000D_ _x000D_ By Year 2-2019 PNA will: Provide evidence that a di…	Milestones _x000D_ _x000D_ Year 1: (Resulting score = 75) â€¢ At the first annual surveillance audit, the client will need to present a plan (including timeline) showing how a strategy to ensure the PNAFTF does not hinder the recovery of Manta and devil rays will be implemented. â€¢ The client will need to provide evidence that available information on Manta and devil rays is being considered in …	Open	reporting
PNA Western and Central Pacific skipjack, yellowfin and bigeye tuna purse seine fishery (FAD and non-FAD sets)	Certified with component(s) in assessment	PNA Western and Central Pacific skipjack and yellowfin, unassociated / non FAD set, tuna purse seine	Default Tree v2.0	2.3.2	Condition 5: Recovery of ETP species (PNA)	Yellowfin tuna Central Western Pacific	Tunas, bonitos, billfishes	Surrounding Nets - With purse lines (purse seines)	Yellowfin tuna, free school	Observer data indicate that the number interactions between the PNAFTF and Manta and devil rays has averaged 634 animals annually over the period 20112015 (PNAO, pers. comm.). It is not clear to what extent Manta and devil rays are retained in the PNAFTF, but retention generally seems unlikely. Croll et al. (2015 noted that while extrapolated from limited observer data, the relatively high mobuli…	Client action plan _x000D_ _x000D_ By Year 1-2018 PNA will: Promote the collection of data on manta and devil rays as part of the PIRFO observer programme, including action taken and state of the species; and will make a request to SPC to undertake a literature review on the mortality to manta and devil rays when returned to sea. _x000D_ _x000D_ By Year 2-2019 PNA will: Provide evidence that a di…	Milestones _x000D_ _x000D_ Year 1: (Resulting score = 75) â€¢ At the first annual surveillance audit, the client will need to present a plan (including timeline) showing how a strategy to ensure the PNAFTF does not hinder the recovery of Manta and devil rays will be implemented. â€¢ The client will need to provide evidence that available information on Manta and devil rays is being considered in …	Open	reporting
PNA Western and Central Pacific skipjack, yellowfin and bigeye tuna purse seine fishery (FAD and non-FAD sets)	Certified with component(s) in assessment	PNA Western and Central Pacific skipjack and yellowfin, unassociated / non FAD set, tuna purse seine	Default Tree v2.0	2.3.2	Condition 6: Recovery of ETP Species (PNAFTF)	Skipjack tuna Central Western Pacific	Tunas, bonitos, billfishes	Surrounding Nets - With purse lines (purse seines)	Skipjack tuna, purse seine targeting free schools	Observer data indicate that the number interactions between the PNAFTF and Manta and devil rays has averaged 634 animals annually over the period 20112015 (PNAO, pers. comm.). It is not clear to what extent Manta and devil rays are retained in the PNAFTF, but retention generally seems unlikely. Croll et al. (2015 noted that while extrapolated from limited observer data, the relatively high mobuli…	By Year 1-2018 PNA will: Promote the collection of data on manta and devil rays as part of the PIRFO observer programme, including action taken and state of the species; and will make a request to SPC to undertake a literature review on the mortality to manta and devil rays when returned to sea. _x000D_ _x000D_ By Year 2-2019 PNA will: Provide evidence that a dialogue has commenced with national …	Year 1: (Resulting score = 75) â€¢ At the first annual surveillance audit, the client will need to present a plan (including timeline) showing how a strategy to ensure the PNAFTF does not hinder the recovery of Manta and devil rays will be implemented. â€¢ The client will need to provide evidence that available information on Manta and devil rays is being considered in developing the strategy, in…	Open	reporting
PNA Western and Central Pacific skipjack, yellowfin and bigeye tuna purse seine fishery (FAD and non-FAD sets)	Certified with component(s) in assessment	PNA Western and Central Pacific skipjack and yellowfin, unassociated / non FAD set, tuna purse seine	Default Tree v2.0	2.3.2	Condition 6: Recovery of ETP Species (PNAFTF)	Yellowfin tuna Central Western Pacific	Tunas, bonitos, billfishes	Surrounding Nets - With purse lines (purse seines)	Yellowfin tuna, free school	Observer data indicate that the number interactions between the PNAFTF and Manta and devil rays has averaged 634 animals annually over the period 20112015 (PNAO, pers. comm.). It is not clear to what extent Manta and devil rays are retained in the PNAFTF, but retention generally seems unlikely. Croll et al. (2015 noted that while extrapolated from limited observer data, the relatively high mobuli…	By Year 1-2018 PNA will: Promote the collection of data on manta and devil rays as part of the PIRFO observer programme, including action taken and state of the species; and will make a request to SPC to undertake a literature review on the mortality to manta and devil rays when returned to sea. _x000D_ _x000D_ By Year 2-2019 PNA will: Provide evidence that a dialogue has commenced with national …	Year 1: (Resulting score = 75) â€¢ At the first annual surveillance audit, the client will need to present a plan (including timeline) showing how a strategy to ensure the PNAFTF does not hinder the recovery of Manta and devil rays will be implemented. â€¢ The client will need to provide evidence that available information on Manta and devil rays is being considered in developing the strategy, in…	Open	reporting
Alaska salmon	Certified	Alaska salmon	Default Tree v2.0 [Salmon]	3.2.2	Condition 9: Decision making	Sockeye(=Red) salmon-SE Alaska	Salmons, trouts, smelts	Surrounding Nets - With purse lines (purse seines)	SEAK	While ADFG decision-making processes are generally responsive to serious issues identified through research, monitoring, evaluation and consultation, it is not clear that they do so for all Ã¢â‚¬Å“serious and other important issuesÃ¢â‚¬Â as required by SG80 scoring issue B. New information presented by stakeholders regarding specific important issues (e.g. straying of chum salmon into West Crawf…	AFDF ACTION: AFDF will work with ADFG and NSRAA to document evidence of actions taken in response to new and unexpected information related to LCI and WCI hatchery strays. Additionally, AFDF will report on ADFGÃ¢â‚¬â„¢s progress towards implementation of the proposal presented at the March 7th, 2020 BOF Hatchery Committee Meeting, which outlined a third-party convening of a working group of agenc…	By the 2nd annual surveillance (around November 2020) demonstrate that a plan is in place to ensure the management system can respond to serious and other important issues and uses the precautionary approach in decision-making as issues arise through research, monitoring, evaluation and consultation. By the 3rd annual surveillance audit (around November 2021) demonstrate that this plan is being c…	Open	transparent
ISF Iceland mackerel	Suspended	ISF Iceland mackerel	Default Tree v2.0	3.1.1	Condition 4: Governance & Policy framework	Mackerel ICES Northeast Atlantic	Miscellaneous pelagic fishes	Trawls - Midwater trawls	Iceland mackerel - Midwater / Pelagic trawl	Rationale _x000D_ _x000D_ SI 3.1.1 a) scored 60. SG 80 requires that there is an effective national legal system and organised and effective cooperation with other parties, where necessary, to deliver management outcomes consistent with MSC Principles 1 and 2. The current cooperation between the countries does not extend to the important sharing of the TAC which has led to catches in excess of IC…	Year 1: The management system for mackerel fisheries. ISF will meet with Ministry of Industry and Innovation (MII), to explain the condition and seek ways to fulfil the condition as milestones suggest and begin/continue discussions with representatives from other coastal states. The condition is new to the local environment but the issue is known. In 2015 a coastal agreement was reached regarding…	Year 1: Communication should be begun or continued with relevant parties to promote cooperation on delivery of outcomes consistent with meeting the requirements of Principle 1 and achieving a suitable means of dispute resolution. Resulting score: 65 _x000D_ _x000D_ Year 2 and Year 3: It is understood that the condition could be closed at any time. Therefore, during Year 2 and 3 should provide inf…	Open	transparent
ISF Iceland mackerel	Suspended	ISF Iceland mackerel	Default Tree v2.0	3.1.1	Condition 4: Governance & Policy framework	Mackerel ICES Northeast Atlantic	Miscellaneous pelagic fishes	Hooks And Lines - Handlines and pole-lines (hand-operated)	Iceland mackerel - Handline	Rationale _x000D_ _x000D_ SI 3.1.1 a) scored 60. SG 80 requires that there is an effective national legal system and organised and effective cooperation with other parties, where necessary, to deliver management outcomes consistent with MSC Principles 1 and 2. The current cooperation between the countries does not extend to the important sharing of the TAC which has led to catches in excess of IC…	Year 1: The management system for mackerel fisheries. ISF will meet with Ministry of Industry and Innovation (MII), to explain the condition and seek ways to fulfil the condition as milestones suggest and begin/continue discussions with representatives from other coastal states. The condition is new to the local environment but the issue is known. In 2015 a coastal agreement was reached regarding…	Year 1: Communication should be begun or continued with relevant parties to promote cooperation on delivery of outcomes consistent with meeting the requirements of Principle 1 and achieving a suitable means of dispute resolution. Resulting score: 65 _x000D_ _x000D_ Year 2 and Year 3: It is understood that the condition could be closed at any time. Therefore, during Year 2 and 3 should provide inf…	Open	transparent
ISF Iceland mackerel	Suspended	ISF Iceland mackerel	Default Tree v2.0	3.1.1	Condition 4: Governance & Policy framework	Mackerel ICES Northeast Atlantic	Miscellaneous pelagic fishes	Trawls - Bottom trawls	Iceland mackerel - Bottom trawl	Rationale _x000D_ _x000D_ SI 3.1.1 a) scored 60. SG 80 requires that there is an effective national legal system and organised and effective cooperation with other parties, where necessary, to deliver management outcomes consistent with MSC Principles 1 and 2. The current cooperation between the countries does not extend to the important sharing of the TAC which has led to catches in excess of IC…	Year 1: The management system for mackerel fisheries. ISF will meet with Ministry of Industry and Innovation (MII), to explain the condition and seek ways to fulfil the condition as milestones suggest and begin/continue discussions with representatives from other coastal states. The condition is new to the local environment but the issue is known. In 2015 a coastal agreement was reached regarding…	Year 1: Communication should be begun or continued with relevant parties to promote cooperation on delivery of outcomes consistent with meeting the requirements of Principle 1 and achieving a suitable means of dispute resolution. Resulting score: 65 _x000D_ _x000D_ Year 2 and Year 3: It is understood that the condition could be closed at any time. Therefore, during Year 2 and 3 should provide inf…	Open	transparent
ISF Iceland mackerel	Suspended	ISF Iceland mackerel	Default Tree v2.0	3.1.1	Condition 4: Governance & Policy framework	Mackerel ICES Northeast Atlantic	Miscellaneous pelagic fishes	Seine Nets	Iceland mackerel - Midwater / Pelagic trawl	Rationale _x000D_ _x000D_ SI 3.1.1 a) scored 60. SG 80 requires that there is an effective national legal system and organised and effective cooperation with other parties, where necessary, to deliver management outcomes consistent with MSC Principles 1 and 2. The current cooperation between the countries does not extend to the important sharing of the TAC which has led to catches in excess of IC…	Year 1: The management system for mackerel fisheries. ISF will meet with Ministry of Industry and Innovation (MII), to explain the condition and seek ways to fulfil the condition as milestones suggest and begin/continue discussions with representatives from other coastal states. The condition is new to the local environment but the issue is known. In 2015 a coastal agreement was reached regarding…	Year 1: Communication should be begun or continued with relevant parties to promote cooperation on delivery of outcomes consistent with meeting the requirements of Principle 1 and achieving a suitable means of dispute resolution. Resulting score: 65 _x000D_ _x000D_ Year 2 and Year 3: It is understood that the condition could be closed at any time. Therefore, during Year 2 and 3 should provide inf…	Open	transparent
Alaska salmon	Certified	Alaska salmon	Default Tree v2.0 [Salmon]	3.2.2	Condition 9: Decision making	Sockeye(=Red) salmon-SE Alaska	Salmons, trouts, smelts	Hooks And Lines - Trolling lines	SEAK	While ADFG decision-making processes are generally responsive to serious issues identified through research, monitoring, evaluation and consultation, it is not clear that they do so for all Ã¢â‚¬Å“serious and other important issuesÃ¢â‚¬Â as required by SG80 scoring issue B. New information presented by stakeholders regarding specific important issues (e.g. straying of chum salmon into West Crawf…	AFDF ACTION: AFDF will work with ADFG and NSRAA to document evidence of actions taken in response to new and unexpected information related to LCI and WCI hatchery strays. Additionally, AFDF will report on ADFGÃ¢â‚¬â„¢s progress towards implementation of the proposal presented at the March 7th, 2020 BOF Hatchery Committee Meeting, which outlined a third-party convening of a working group of agenc…	By the 2nd annual surveillance (around November 2020) demonstrate that a plan is in place to ensure the management system can respond to serious and other important issues and uses the precautionary approach in decision-making as issues arise through research, monitoring, evaluation and consultation. By the 3rd annual surveillance audit (around November 2021) demonstrate that this plan is being c…	Open	transparent
Alaska salmon	Certified	Alaska salmon	Default Tree v2.0 [Salmon]	3.2.2	Condition 9: Decision making	Coho(=Silver) salmon-SE Alaska	Salmons, trouts, smelts	Gillnets And Entangling Nets - Driftnets	SEAK	While ADFG decision-making processes are generally responsive to serious issues identified through research, monitoring, evaluation and consultation, it is not clear that they do so for all Ã¢â‚¬Å“serious and other important issuesÃ¢â‚¬Â as required by SG80 scoring issue B. New information presented by stakeholders regarding specific important issues (e.g. straying of chum salmon into West Crawf…	AFDF ACTION: AFDF will work with ADFG and NSRAA to document evidence of actions taken in response to new and unexpected information related to LCI and WCI hatchery strays. Additionally, AFDF will report on ADFGÃ¢â‚¬â„¢s progress towards implementation of the proposal presented at the March 7th, 2020 BOF Hatchery Committee Meeting, which outlined a third-party convening of a working group of agenc…	By the 2nd annual surveillance (around November 2020) demonstrate that a plan is in place to ensure the management system can respond to serious and other important issues and uses the precautionary approach in decision-making as issues arise through research, monitoring, evaluation and consultation. By the 3rd annual surveillance audit (around November 2021) demonstrate that this plan is being c…	Open	transparent
ISF Iceland North East Atlantic blue whiting	Suspended	Iceland North East Atlantic blue whiting	Default Tree v2.0	3.1.1	Condition 5: Legal and/or Customary framework	Whiting Northeast Atlantic	Cods, hakes, haddocks	Trawls - Bottom trawls	Trawls - Bottom trawls	Rationale _x000D_ _x000D_ Evaluation Table for PI 3.1.1 â€“ Legal and/or customary framework _x000D_ SG80 SIa) requirement: Compatibility of laws or standards with effective management. There is an effective national legal system and organised and effective cooperation with other parties, where necessary, to deliver management outcomes consistent with MSC Principles 1 and 2. _x000D_ _x000D_ Findi…	Client action plan _x000D_ _x000D_ Harmonizing blue whiting fisheries with European Union, the Faroe Islands and Norway._x000D_ _x000D_ Year 1: ISF will meet with Ministry of Industry and Innovation (MII), to explain the condition and seek ways to fulfill the condition as milestones suggest and begin discussions with representatives from other coastal states. The condition is new to the local env…	Milestones _x000D_ _x000D_ Year 1: Communication should be begun or continued with relevant parties to promote cooperation on delivery of outcomes consistent with meeting the requirements of Principle 1 and achieving a suitable means of dispute resolution. FPO shall provide documented evidence of all correspondence, meetings, representations etc. _x000D_ _x000D_ Year 2 and Year 3: It is understoo…	Open	transparent
ISF Iceland North East Atlantic blue whiting	Suspended	Iceland North East Atlantic blue whiting	Default Tree v2.0	3.1.1	Condition 5: Legal and/or Customary framework	Whiting Northeast Atlantic	Cods, hakes, haddocks	Trawls - Midwater trawls	Pelagic trawl & Purse seine	Rationale _x000D_ _x000D_ Evaluation Table for PI 3.1.1 â€“ Legal and/or customary framework _x000D_ SG80 SIa) requirement: Compatibility of laws or standards with effective management. There is an effective national legal system and organised and effective cooperation with other parties, where necessary, to deliver management outcomes consistent with MSC Principles 1 and 2. _x000D_ _x000D_ Findi…	Client action plan _x000D_ _x000D_ Harmonizing blue whiting fisheries with European Union, the Faroe Islands and Norway._x000D_ _x000D_ Year 1: ISF will meet with Ministry of Industry and Innovation (MII), to explain the condition and seek ways to fulfill the condition as milestones suggest and begin discussions with representatives from other coastal states. The condition is new to the local env…	Milestones _x000D_ _x000D_ Year 1: Communication should be begun or continued with relevant parties to promote cooperation on delivery of outcomes consistent with meeting the requirements of Principle 1 and achieving a suitable means of dispute resolution. FPO shall provide documented evidence of all correspondence, meetings, representations etc. _x000D_ _x000D_ Year 2 and Year 3: It is understoo…	Open	transparent
Alaska salmon	Certified	Alaska salmon	Default Tree v2.0 [Salmon]	3.2.2	Condition 9: Decision making	Coho(=Silver) salmon-SE Alaska	Salmons, trouts, smelts	Surrounding Nets - With purse lines (purse seines)	SEAK	While ADFG decision-making processes are generally responsive to serious issues identified through research, monitoring, evaluation and consultation, it is not clear that they do so for all Ã¢â‚¬Å“serious and other important issuesÃ¢â‚¬Â as required by SG80 scoring issue B. New information presented by stakeholders regarding specific important issues (e.g. straying of chum salmon into West Crawf…	AFDF ACTION: AFDF will work with ADFG and NSRAA to document evidence of actions taken in response to new and unexpected information related to LCI and WCI hatchery strays. Additionally, AFDF will report on ADFGÃ¢â‚¬â„¢s progress towards implementation of the proposal presented at the March 7th, 2020 BOF Hatchery Committee Meeting, which outlined a third-party convening of a working group of agenc…	By the 2nd annual surveillance (around November 2020) demonstrate that a plan is in place to ensure the management system can respond to serious and other important issues and uses the precautionary approach in decision-making as issues arise through research, monitoring, evaluation and consultation. By the 3rd annual surveillance audit (around November 2021) demonstrate that this plan is being c…	Open	transparent
Alaska salmon	Certified	Alaska salmon	Default Tree v2.0 [Salmon]	3.2.2	Condition 9: Decision making	Coho(=Silver) salmon-SE Alaska	Salmons, trouts, smelts	Hooks And Lines - Trolling lines	SEAK	While ADFG decision-making processes are generally responsive to serious issues identified through research, monitoring, evaluation and consultation, it is not clear that they do so for all Ã¢â‚¬Å“serious and other important issuesÃ¢â‚¬Â as required by SG80 scoring issue B. New information presented by stakeholders regarding specific important issues (e.g. straying of chum salmon into West Crawf…	AFDF ACTION: AFDF will work with ADFG and NSRAA to document evidence of actions taken in response to new and unexpected information related to LCI and WCI hatchery strays. Additionally, AFDF will report on ADFGÃ¢â‚¬â„¢s progress towards implementation of the proposal presented at the March 7th, 2020 BOF Hatchery Committee Meeting, which outlined a third-party convening of a working group of agenc…	By the 2nd annual surveillance (around November 2020) demonstrate that a plan is in place to ensure the management system can respond to serious and other important issues and uses the precautionary approach in decision-making as issues arise through research, monitoring, evaluation and consultation. By the 3rd annual surveillance audit (around November 2021) demonstrate that this plan is being c…	Open	transparent
Alaska salmon	Certified	Alaska salmon	Default Tree v2.0 [Salmon]	3.2.2	Condition 9: Decision making	Chum(=Keta=Dog) salmon-SE Alaska	Salmons, trouts, smelts	Gillnets And Entangling Nets - Driftnets	SEAK	While ADFG decision-making processes are generally responsive to serious issues identified through research, monitoring, evaluation and consultation, it is not clear that they do so for all Ã¢â‚¬Å“serious and other important issuesÃ¢â‚¬Â as required by SG80 scoring issue B. New information presented by stakeholders regarding specific important issues (e.g. straying of chum salmon into West Crawf…	AFDF ACTION: AFDF will work with ADFG and NSRAA to document evidence of actions taken in response to new and unexpected information related to LCI and WCI hatchery strays. Additionally, AFDF will report on ADFGÃ¢â‚¬â„¢s progress towards implementation of the proposal presented at the March 7th, 2020 BOF Hatchery Committee Meeting, which outlined a third-party convening of a working group of agenc…	By the 2nd annual surveillance (around November 2020) demonstrate that a plan is in place to ensure the management system can respond to serious and other important issues and uses the precautionary approach in decision-making as issues arise through research, monitoring, evaluation and consultation. By the 3rd annual surveillance audit (around November 2021) demonstrate that this plan is being c…	Open	transparent
WPSTA Western and Central Pacific skipjack and yellowfin free school purse seine	Certified	WPSTA Western and Central Pacific skipjack and yellowfin free school purse seine	Default Tree v2.0	3.1.2	Condition 10: Consultation, roles and responsibilities	Skipjack tuna Central Western Pacific	Tunas, bonitos, billfishes	Surrounding Nets - With purse lines (purse seines)	Skipjack, Chinese Taipei - purse seine, free School (unassociated) sets only	Key management decisions in relation to this Scoring Issue are taken at the regional level (WCPFC) with members (flag and coastal States) required to implement agreed decisions. Members can feed into the management system by providing data, preparing proposals and contributing to the discussion/decision process. As part of this process, at the SG 80, Members also need to have transparent domestic…	General approach: _x000D_ The approach to addressing this condition will focus on getting publicity of meeting minutes or historical or present cases that provides sufficient information that demonstrates the regularity of meetings and consideration of the information obtained at these meetings by Authority. _x000D_ _x000D_ Action Plan Year 1 Activities: _x000D_ WPSTA members will work with TFA t…	Year 1 (2019): Existing consultation structures, procedures and meeting minutes or relevant evidence to demonstrate the obtained information being accepted and considered by Authority are documented. Evidence provided will allow the CAB to evaluate the frequency, means to access, types of mechanisms and procedural clarity of mechanisms for input into national and international measures relevant t…	Closed	transparent
WPSTA Western and Central Pacific skipjack and yellowfin free school purse seine	Certified	WPSTA Western and Central Pacific skipjack and yellowfin free school purse seine	Default Tree v2.0	3.1.2	Condition 10: Consultation, roles and responsibilities	Yellowfin tuna Central Western Pacific	Tunas, bonitos, billfishes	Surrounding Nets - With purse lines (purse seines)	Yellowfin, China Taipei - purse seine, free School (unassociated) sets only	Key management decisions in relation to this Scoring Issue are taken at the regional level (WCPFC) with members (flag and coastal States) required to implement agreed decisions. Members can feed into the management system by providing data, preparing proposals and contributing to the discussion/decision process. As part of this process, at the SG 80, Members also need to have transparent domestic…	General approach: _x000D_ The approach to addressing this condition will focus on getting publicity of meeting minutes or historical or present cases that provides sufficient information that demonstrates the regularity of meetings and consideration of the information obtained at these meetings by Authority. _x000D_ _x000D_ Action Plan Year 1 Activities: _x000D_ WPSTA members will work with TFA t…	Year 1 (2019): Existing consultation structures, procedures and meeting minutes or relevant evidence to demonstrate the obtained information being accepted and considered by Authority are documented. Evidence provided will allow the CAB to evaluate the frequency, means to access, types of mechanisms and procedural clarity of mechanisms for input into national and international measures relevant t…	Closed	transparent
Alaska salmon	Certified	Alaska salmon	Default Tree v2.0 [Salmon]	3.2.2	Condition 9: Decision making	Chum(=Keta=Dog) salmon-SE Alaska	Salmons, trouts, smelts	Surrounding Nets - With purse lines (purse seines)	SEAK	While ADFG decision-making processes are generally responsive to serious issues identified through research, monitoring, evaluation and consultation, it is not clear that they do so for all Ã¢â‚¬Å“serious and other important issuesÃ¢â‚¬Â as required by SG80 scoring issue B. New information presented by stakeholders regarding specific important issues (e.g. straying of chum salmon into West Crawf…	AFDF ACTION: AFDF will work with ADFG and NSRAA to document evidence of actions taken in response to new and unexpected information related to LCI and WCI hatchery strays. Additionally, AFDF will report on ADFGÃ¢â‚¬â„¢s progress towards implementation of the proposal presented at the March 7th, 2020 BOF Hatchery Committee Meeting, which outlined a third-party convening of a working group of agenc…	By the 2nd annual surveillance (around November 2020) demonstrate that a plan is in place to ensure the management system can respond to serious and other important issues and uses the precautionary approach in decision-making as issues arise through research, monitoring, evaluation and consultation. By the 3rd annual surveillance audit (around November 2021) demonstrate that this plan is being c…	Open	transparent
Alaska salmon	Certified	Alaska salmon	Default Tree v2.0 [Salmon]	3.2.2	Condition 9: Decision making	Chum(=Keta=Dog) salmon-SE Alaska	Salmons, trouts, smelts	Hooks And Lines - Trolling lines	SEAK	While ADFG decision-making processes are generally responsive to serious issues identified through research, monitoring, evaluation and consultation, it is not clear that they do so for all Ã¢â‚¬Å“serious and other important issuesÃ¢â‚¬Â as required by SG80 scoring issue B. New information presented by stakeholders regarding specific important issues (e.g. straying of chum salmon into West Crawf…	AFDF ACTION: AFDF will work with ADFG and NSRAA to document evidence of actions taken in response to new and unexpected information related to LCI and WCI hatchery strays. Additionally, AFDF will report on ADFGÃ¢â‚¬â„¢s progress towards implementation of the proposal presented at the March 7th, 2020 BOF Hatchery Committee Meeting, which outlined a third-party convening of a working group of agenc…	By the 2nd annual surveillance (around November 2020) demonstrate that a plan is in place to ensure the management system can respond to serious and other important issues and uses the precautionary approach in decision-making as issues arise through research, monitoring, evaluation and consultation. By the 3rd annual surveillance audit (around November 2021) demonstrate that this plan is being c…	Open	transparent
Alaska salmon	Certified	Alaska salmon	Default Tree v2.0 [Salmon]	3.2.2	Condition 9: Decision making	Chinook(=Spring=King) salmon-SE Alaska	Salmons, trouts, smelts	Surrounding Nets - With purse lines (purse seines)	SEAK	While ADFG decision-making processes are generally responsive to serious issues identified through research, monitoring, evaluation and consultation, it is not clear that they do so for all Ã¢â‚¬Å“serious and other important issuesÃ¢â‚¬Â as required by SG80 scoring issue B. New information presented by stakeholders regarding specific important issues (e.g. straying of chum salmon into West Crawf…	AFDF ACTION: AFDF will work with ADFG and NSRAA to document evidence of actions taken in response to new and unexpected information related to LCI and WCI hatchery strays. Additionally, AFDF will report on ADFGÃ¢â‚¬â„¢s progress towards implementation of the proposal presented at the March 7th, 2020 BOF Hatchery Committee Meeting, which outlined a third-party convening of a working group of agenc…	By the 2nd annual surveillance (around November 2020) demonstrate that a plan is in place to ensure the management system can respond to serious and other important issues and uses the precautionary approach in decision-making as issues arise through research, monitoring, evaluation and consultation. By the 3rd annual surveillance audit (around November 2021) demonstrate that this plan is being c…	Open	transparent
Alaska salmon	Certified	Alaska salmon	Default Tree v2.0 [Salmon]	3.2.2	Condition 9: Decision making	Chinook(=Spring=King) salmon-SE Alaska	Salmons, trouts, smelts	Hooks And Lines - Trolling lines	SEAK	While ADFG decision-making processes are generally responsive to serious issues identified through research, monitoring, evaluation and consultation, it is not clear that they do so for all Ã¢â‚¬Å“serious and other important issuesÃ¢â‚¬Â as required by SG80 scoring issue B. New information presented by stakeholders regarding specific important issues (e.g. straying of chum salmon into West Crawf…	AFDF ACTION: AFDF will work with ADFG and NSRAA to document evidence of actions taken in response to new and unexpected information related to LCI and WCI hatchery strays. Additionally, AFDF will report on ADFGÃ¢â‚¬â„¢s progress towards implementation of the proposal presented at the March 7th, 2020 BOF Hatchery Committee Meeting, which outlined a third-party convening of a working group of agenc…	By the 2nd annual surveillance (around November 2020) demonstrate that a plan is in place to ensure the management system can respond to serious and other important issues and uses the precautionary approach in decision-making as issues arise through research, monitoring, evaluation and consultation. By the 3rd annual surveillance audit (around November 2021) demonstrate that this plan is being c…	Open	transparent
Echebastar Indian Ocean purse seine skipjack tuna	Certified	Echebastar Indian Ocean purse seine skipjack tuna	Default Tree v2.0	3.1.2	Condition 6: Consultation, roles and responsibilities	Skipjack Tuna Indian Ocean	Tunas, bonitos, billfishes	Surrounding Nets - With purse lines (purse seines)	UoC 1: Skipjack tuna, Indian Ocean, purse seine including all set types	SIb, Consultation processes. The management system includes consultation processes that regularly seek and accept relevant information, including local knowledge. The management system demonstrates consideration of the information obtained. _x000D_ Evidence (Welch & Kerrigan (2015), Standing (2016), stakeholder interviews â€“ SFBOA, SFA, MAF & Blue Economy) indicates the limited input of local st…	The Seychelles Fishing Authority (SFA) works in close collaboration with its parent Ministry, other Government entities, and a wide range of other stakeholders including international agencies, NGOs (e.g. WWF), fishermen and their representatives (e.g. FBOA). _x000D_ As identified in the evaluation report, it is widely recognised that, in the past, the involvement of stakeholders in the decision-…	Year 1. Echebastar will provide evidence to the audit team in the first annual surveillance audit that the options to improve the consultation process in the management of the Seychelles tuna fisheries have been discussed. Expected score = 75 _x000D_ _x000D_ Year 2. Echebastar will provide evidence to the audit team in the second annual surveillance audit that the consultation process for tuna ma…	Open	transparent
Usufuku Honten Northeast Atlantic longline bluefin tuna fishery	Certified	Usufuku Honten Northeast Atlantic longline bluefin tuna fishery	Default Tree v2.0	2.3.3	Condition 7: Information adequacy for management strategy	Bluefin tuna Eastern Atlantic	Tunas, bonitos, billfishes	Hooks And Lines - Longlines	Usufuku Honten Northeast Atlantic longline bluefin	At the UoA level, the observer data is provided by a 3rd party to the JFA following_x000D_ strict guidelines (Figure 16) and for the years taken included the entire fishing season_x000D_ (though not every haul). It is therefore considered an adequate information source_x000D_ from which to develop a strategy to manage impacts for ETP species. The JOP_x000D_ program meets ICCAT requirements of 20 …	Year 1_x000D_ Before the fishing season, we will review and check logbook (catch result report)_x000D_ recording requirements to ensure thorough understanding. At annual surveillance_x000D_ audit, we will submit the records as evidence._x000D_ Year 2 and 3_x000D_ Before the fishing season, we will review last yearÃ¢â‚¬â„¢s performance on the logbook_x000D_ (catch result report) recording, check t…	Milestone Year 1: The client should develop a plan and begin implementation of plan_x000D_ on how to best improve information adequacy from the UoA with respect to ETP_x000D_ species. At the 1st surveillance audit the client will detail the actions undertaken._x000D_ Score <80._x000D_ Milestone Year 2: The client should continue with the implementation of plan on how_x000D_ to best improve inform…	Open	reporting
Chile squat lobsters and nylon shrimp modified Trawl	Certified	Chile squat lobsters and nylon shrimp modified Trawl fishery	Default Tree v1.3	2.1.3	Condition 3: Primary species information - UoCs 1,3 and 6.	Yellow squat lobster-87, Northern Chile	King crabs, squat-lobsters	Trawls - Bottom trawls	Yellow Squat Lobster Northern	b.Questions are raised about amount of removals as IFOP reports indicate that SERNAPESCA underestimates catch. Additionally, IFOP data do not account for discards before catch is brought on deck. Further, for cardinal fish there is no current monitoring of the population as the collapsed fishery is closed. IFOP monitoring provides data on catch composition which suggests that removals in this fis…	At the first annual audit we will provide evidence to the auditors that we have we have reviewed with our members, SUBPESCA and IFOP the current approach to data collection and how accurate this is to reflect the quantities of cardinal fish taken in the fishery. On the basis of that review, we will have identified the options for improving data collection of all retained species, including cardin…	At the first annual audit, the client will present the CAB with evidence that there has been consideration of the options for collecting data to estimate outcome status of cardinal fish, and also to ensure that sufficient data continue to be collected. The score will not change on completion of this milestone. _x000D_ At the second annual audit, the client will present the CAB with evidence that …	Closed	reporting
Chile squat lobsters and nylon shrimp modified Trawl	Certified	Chile squat lobsters and nylon shrimp modified Trawl fishery	Default Tree v1.3	2.1.3	Condition 3: Primary species information - UoCs 1,3 and 6.	Red squat lobster-87, Northern Chile	King crabs, squat-lobsters	Trawls - Bottom trawls	Red Squat Lobster Northern	b.Questions are raised about amount of removals as IFOP reports indicate that SERNAPESCA underestimates catch. Additionally, IFOP data do not account for discards before catch is brought on deck. Further, for cardinal fish there is no current monitoring of the population as the collapsed fishery is closed. IFOP monitoring provides data on catch composition which suggests that removals in this fis…	At the first annual audit we will provide evidence to the auditors that we have we have reviewed with our members, SUBPESCA and IFOP the current approach to data collection and how accurate this is to reflect the quantities of cardinal fish taken in the fishery. On the basis of that review, we will have identified the options for improving data collection of all retained species, including cardin…	At the first annual audit, the client will present the CAB with evidence that there has been consideration of the options for collecting data to estimate outcome status of cardinal fish, and also to ensure that sufficient data continue to be collected. The score will not change on completion of this milestone. _x000D_ At the second annual audit, the client will present the CAB with evidence that …	Closed	reporting
Chile squat lobsters and nylon shrimp modified Trawl	Certified	Chile squat lobsters and nylon shrimp modified Trawl fishery	Default Tree v1.3	2.1.3	Condition 3: Primary species information - UoCs 1,3 and 6.	Nylon Shrimp-87, Northern and Southern Chile	Shrimps, prawns	Trawls - Bottom trawls	Nylon Shrimp	b.Questions are raised about amount of removals as IFOP reports indicate that SERNAPESCA underestimates catch. Additionally, IFOP data do not account for discards before catch is brought on deck. Further, for cardinal fish there is no current monitoring of the population as the collapsed fishery is closed. IFOP monitoring provides data on catch composition which suggests that removals in this fis…	At the first annual audit we will provide evidence to the auditors that we have we have reviewed with our members, SUBPESCA and IFOP the current approach to data collection and how accurate this is to reflect the quantities of cardinal fish taken in the fishery. On the basis of that review, we will have identified the options for improving data collection of all retained species, including cardin…	At the first annual audit, the client will present the CAB with evidence that there has been consideration of the options for collecting data to estimate outcome status of cardinal fish, and also to ensure that sufficient data continue to be collected. The score will not change on completion of this milestone. _x000D_ At the second annual audit, the client will present the CAB with evidence that …	Closed	reporting
Usufuku Honten Northeast Atlantic longline bluefin tuna fishery	Certified	Usufuku Honten Northeast Atlantic longline bluefin tuna fishery	Default Tree v2.0	1.2.3	Condition 3: Fishery removals information	Bluefin tuna Eastern Atlantic	Tunas, bonitos, billfishes	Hooks And Lines - Longlines	Usufuku Honten Northeast Atlantic longline bluefin	The ICCAT requirements for recording catch information (catch documentation scheme)_x000D_ are summarised in Section 3.3.10.1. These apply to all fisheries targeting bluefin tuna or_x000D_ which have bluefin quota. There is therefore good information on these removals. There_x000D_ are two areas of potential concern: IUU removals and the recreational fishery._x000D_ WWF-Mediterranean have been co…	Year 1 - Hold discussions with JFA, relevant organizations and eNGOs to seek support for_x000D_ a project that would promote better understanding of IUU and recreational catch and_x000D_ provide quantitative data. It is expected to discuss methodology to improve data accuracy, effective use of tags, market survey on IUU Atlantic BFT, reinforcement of_x000D_ traceability system and so on. The outp…	Milestone Year 1: The client should consider how to best support projects that aim to_x000D_ quantify IUU and recreational removals from the stock and report on the action taken_x000D_ to the CAB at the audit. Score 75_x000D_ Milestone Year 2: Working with other fisheries or organisation as relevant, the client_x000D_ should support projects that aim to quantify IUU and recreational removals from…	Open	illegal
Australian Eastern Tuna and Billfish Fishery (albacore tuna, yellowfin tuna, bigeye tuna and swordfish)	Certified	Australian Eastern Tuna and Billfish Fishery (albacore tuna, yellowfin tuna, bigeye tuna and swordfish)	Default Tree v2.0	2.1.2	Condition 9	Albacore tuna South Pacific Ocean	Tunas, bonitos, billfishes	Hooks And Lines - Longlines	Albacore - Pelagic longline	Argentine squid (AS):_x000D_ There is an uncertain amount of IUU activity occurring in the fishery and it_x000D_ has been reported that the management objective has not been met in_x000D_ recent years. Recent stock assessment information is not available._x000D_ Therefore, it is uncertain whether the partial strategy is being implemented_x000D_ successfully. SG80 is not met. _x000D_ For main prim…	The use of Argentine Squid (Illex) in the fishery is currently decreasing as_x000D_ increasing bait prices are being driven by consumer demand for food grade_x000D_ squid in China and elsewhere. Similarly, price fluctuations have also been_x000D_ driven by the inconsistency of yearly catches. These recent price impacts_x000D_ on the fishery have caused a change to fishing strategy and reduced use…	Year 1 (2021): A plan has been developed that sets out the approach to_x000D_ providing evidence and how evidence provided will address the_x000D_ requirements of this scoring issue._x000D_ Resulting score: 75_x000D_ Years 2-3 (2022-2023): The plan developed in Year 1 has been_x000D_ implemented. Evidence is accumulated to address the requirements of the_x000D_ scoring issue._x000D_ Resulting sco…	Open	illegal
Australian Eastern Tuna and Billfish Fishery (albacore tuna, yellowfin tuna, bigeye tuna and swordfish)	Certified	Australian Eastern Tuna and Billfish Fishery (albacore tuna, yellowfin tuna, bigeye tuna and swordfish)	Default Tree v2.0	2.1.2	Condition 9	Yellowfin tuna Central Western Pacific	Tunas, bonitos, billfishes	Hooks And Lines - Longlines	Yellowfin - Pelagic longline	Argentine squid (AS):_x000D_ There is an uncertain amount of IUU activity occurring in the fishery and it_x000D_ has been reported that the management objective has not been met in_x000D_ recent years. Recent stock assessment information is not available._x000D_ Therefore, it is uncertain whether the partial strategy is being implemented_x000D_ successfully. SG80 is not met. _x000D_ For main prim…	The use of Argentine Squid (Illex) in the fishery is currently decreasing as_x000D_ increasing bait prices are being driven by consumer demand for food grade_x000D_ squid in China and elsewhere. Similarly, price fluctuations have also been_x000D_ driven by the inconsistency of yearly catches. These recent price impacts_x000D_ on the fishery have caused a change to fishing strategy and reduced use…	Year 1 (2021): A plan has been developed that sets out the approach to_x000D_ providing evidence and how evidence provided will address the_x000D_ requirements of this scoring issue._x000D_ Resulting score: 75_x000D_ Years 2-3 (2022-2023): The plan developed in Year 1 has been_x000D_ implemented. Evidence is accumulated to address the requirements of the_x000D_ scoring issue._x000D_ Resulting sco…	Open	illegal
Australian Eastern Tuna and Billfish Fishery (albacore tuna, yellowfin tuna, bigeye tuna and swordfish)	Certified	Australian Eastern Tuna and Billfish Fishery (albacore tuna, yellowfin tuna, bigeye tuna and swordfish)	Default Tree v2.0	2.1.2	Condition 9	Bigeye tuna Central Western Pacific	Tunas, bonitos, billfishes	Hooks And Lines - Longlines	Bigeye tuna (Thunnus obesus)	Argentine squid (AS):_x000D_ There is an uncertain amount of IUU activity occurring in the fishery and it_x000D_ has been reported that the management objective has not been met in_x000D_ recent years. Recent stock assessment information is not available._x000D_ Therefore, it is uncertain whether the partial strategy is being implemented_x000D_ successfully. SG80 is not met. _x000D_ For main prim…	The use of Argentine Squid (Illex) in the fishery is currently decreasing as_x000D_ increasing bait prices are being driven by consumer demand for food grade_x000D_ squid in China and elsewhere. Similarly, price fluctuations have also been_x000D_ driven by the inconsistency of yearly catches. These recent price impacts_x000D_ on the fishery have caused a change to fishing strategy and reduced use…	Year 1 (2021): A plan has been developed that sets out the approach to_x000D_ providing evidence and how evidence provided will address the_x000D_ requirements of this scoring issue._x000D_ Resulting score: 75_x000D_ Years 2-3 (2022-2023): The plan developed in Year 1 has been_x000D_ implemented. Evidence is accumulated to address the requirements of the_x000D_ scoring issue._x000D_ Resulting sco…	Open	illegal
Australian Eastern Tuna and Billfish Fishery (albacore tuna, yellowfin tuna, bigeye tuna and swordfish)	Certified	Australian Eastern Tuna and Billfish Fishery (albacore tuna, yellowfin tuna, bigeye tuna and swordfish)	Default Tree v2.0	2.1.2	Condition 9	Swordfish South West Pacific	Tunas, bonitos, billfishes	Hooks And Lines - Longlines	Swordfish - Pelagic longline	Argentine squid (AS):_x000D_ There is an uncertain amount of IUU activity occurring in the fishery and it_x000D_ has been reported that the management objective has not been met in_x000D_ recent years. Recent stock assessment information is not available._x000D_ Therefore, it is uncertain whether the partial strategy is being implemented_x000D_ successfully. SG80 is not met. _x000D_ For main prim…	The use of Argentine Squid (Illex) in the fishery is currently decreasing as_x000D_ increasing bait prices are being driven by consumer demand for food grade_x000D_ squid in China and elsewhere. Similarly, price fluctuations have also been_x000D_ driven by the inconsistency of yearly catches. These recent price impacts_x000D_ on the fishery have caused a change to fishing strategy and reduced use…	Year 1 (2021): A plan has been developed that sets out the approach to_x000D_ providing evidence and how evidence provided will address the_x000D_ requirements of this scoring issue._x000D_ Resulting score: 75_x000D_ Years 2-3 (2022-2023): The plan developed in Year 1 has been_x000D_ implemented. Evidence is accumulated to address the requirements of the_x000D_ scoring issue._x000D_ Resulting sco…	Open	illegal
Russian and Estonian Lake Peipus perch and pike-perch	Certified	Russian and Estonian Lake Peipus perch and pike-perch	Default Tree v2.0	1.2.4	Condition 4 UoAs: 3, 4, 7, 8	Pikeperch-05, Lake Peipus	Miscellaneous freshwater fishes	Miscellaneous Gear	Russia	The level of IUU catch and discard mortality is accounted for by applying a correction_x000D_ factor to the official catch statistics. The ultimate values of non-commercial and IUU_x000D_ removals and discard are determined by expert review of fishery scientists of both_x000D_ countries at joint ERFC, but the Assessment Team has not seen a clear explanation of_x000D_ the methodology employed. Ess…	The Client will cooperate with Logi-F to fulfill the action plan according to time frames_x000D_ and details presented in Logi-F Estonian assessment (MC 2017)._x000D_ Although the condition is set for Estonian side of fishery, the Client will include in the_x000D_ report also the relevant general information published by Russian authorities_x000D_ The Client, in consultations with Estonian Fisher…	Milestones and resulting scores will be as determined in the Logi-F Estonian_x000D_ assessment (MC 2017). This will mean meeting the Logi-F Year 1, 2 and 3 milestones_x000D_ at the first surveillance audit, expected early in 2021._x000D_ 1st surveillance:_x000D_ Design a scientifically valid approach to determine the sources and amounts of pikeperch mortality associated with recreational and IUU …	Open	transparent
Russian and Estonian Lake Peipus perch and pike-perch	Certified	Russian and Estonian Lake Peipus perch and pike-perch	Default Tree v2.0	1.2.4	Condition 4 UoAs: 3, 4, 7, 8	Pikeperch-05, Lake Peipus	Miscellaneous freshwater fishes	Seine Nets - Boat or vessel seines - Danish seines	Russia	The level of IUU catch and discard mortality is accounted for by applying a correction_x000D_ factor to the official catch statistics. The ultimate values of non-commercial and IUU_x000D_ removals and discard are determined by expert review of fishery scientists of both_x000D_ countries at joint ERFC, but the Assessment Team has not seen a clear explanation of_x000D_ the methodology employed. Ess…	The Client will cooperate with Logi-F to fulfill the action plan according to time frames_x000D_ and details presented in Logi-F Estonian assessment (MC 2017)._x000D_ Although the condition is set for Estonian side of fishery, the Client will include in the_x000D_ report also the relevant general information published by Russian authorities_x000D_ The Client, in consultations with Estonian Fisher…	Milestones and resulting scores will be as determined in the Logi-F Estonian_x000D_ assessment (MC 2017). This will mean meeting the Logi-F Year 1, 2 and 3 milestones_x000D_ at the first surveillance audit, expected early in 2021._x000D_ 1st surveillance:_x000D_ Design a scientifically valid approach to determine the sources and amounts of pikeperch mortality associated with recreational and IUU …	Open	transparent
Russian and Estonian Lake Peipus perch and pike-perch	Certified	Russian and Estonian Lake Peipus perch and pike-perch	Default Tree v2.0	1.2.4	Condition 4 UoAs: 3, 4, 7, 8	Pikeperch-05, Lake Peipus	Miscellaneous freshwater fishes	Miscellaneous Gear	Estonia	The level of IUU catch and discard mortality is accounted for by applying a correction_x000D_ factor to the official catch statistics. The ultimate values of non-commercial and IUU_x000D_ removals and discard are determined by expert review of fishery scientists of both_x000D_ countries at joint ERFC, but the Assessment Team has not seen a clear explanation of_x000D_ the methodology employed. Ess…	The Client will cooperate with Logi-F to fulfill the action plan according to time frames_x000D_ and details presented in Logi-F Estonian assessment (MC 2017)._x000D_ Although the condition is set for Estonian side of fishery, the Client will include in the_x000D_ report also the relevant general information published by Russian authorities_x000D_ The Client, in consultations with Estonian Fisher…	Milestones and resulting scores will be as determined in the Logi-F Estonian_x000D_ assessment (MC 2017). This will mean meeting the Logi-F Year 1, 2 and 3 milestones_x000D_ at the first surveillance audit, expected early in 2021._x000D_ 1st surveillance:_x000D_ Design a scientifically valid approach to determine the sources and amounts of pikeperch mortality associated with recreational and IUU …	Open	transparent
Russian and Estonian Lake Peipus perch and pike-perch	Certified	Russian and Estonian Lake Peipus perch and pike-perch	Default Tree v2.0	1.2.4	Condition 4 UoAs: 3, 4, 7, 8	Pikeperch-05, Lake Peipus	Miscellaneous freshwater fishes	Seine Nets - Boat or vessel seines - Danish seines	Estonia	The level of IUU catch and discard mortality is accounted for by applying a correction_x000D_ factor to the official catch statistics. The ultimate values of non-commercial and IUU_x000D_ removals and discard are determined by expert review of fishery scientists of both_x000D_ countries at joint ERFC, but the Assessment Team has not seen a clear explanation of_x000D_ the methodology employed. Ess…	The Client will cooperate with Logi-F to fulfill the action plan according to time frames_x000D_ and details presented in Logi-F Estonian assessment (MC 2017)._x000D_ Although the condition is set for Estonian side of fishery, the Client will include in the_x000D_ report also the relevant general information published by Russian authorities_x000D_ The Client, in consultations with Estonian Fisher…	Milestones and resulting scores will be as determined in the Logi-F Estonian_x000D_ assessment (MC 2017). This will mean meeting the Logi-F Year 1, 2 and 3 milestones_x000D_ at the first surveillance audit, expected early in 2021._x000D_ 1st surveillance:_x000D_ Design a scientifically valid approach to determine the sources and amounts of pikeperch mortality associated with recreational and IUU …	Open	transparent
Russian and Estonian Lake Peipus perch and pike-perch	Certified	Russian and Estonian Lake Peipus perch and pike-perch	Default Tree v2.0	1.2.4	Condition 2 UoAs: 1, 2, 5, 6	European perch - 05, Lake Peipus	Miscellaneous freshwater fishes	Miscellaneous Gear	Estonia	The ultimate values of non-commercial and IUU removals and discard are determined_x000D_ by expert review of fishery scientists of both countries at joint ERFC, but the_x000D_ Assessment Team has not seen a clear explanation of the methodology employed._x000D_ Essentially, it is clear that the assessment identifies major sources of uncertainty, but_x000D_ it is not apparent how this uncertainty i…	The Client will cooperate with Logi-F to fulfill the action plan according to time frames_x000D_ and details presented in Logi-F Estonian assessment (MC 2017)._x000D_ Although the condition is set for Estonian side of fishery, the Client will include in the_x000D_ report also the relevant general information published by Russian authorities_x000D_ The Client, in consultations with Estonian Fisher…	Milestones and resulting scores will be as determined in the Logi-F Estonian_x000D_ assessment (MC 2017). This will mean meeting the Logi-F Year 1, 2 and 3 milestones_x000D_ at the first surveillance audit, expected early in 2021._x000D_ 1st surveillance:_x000D_ Design a scientifically valid approach to determine the sources and amounts of perch_x000D_ mortality associated with recreational and I…	Open	transparent
Russian and Estonian Lake Peipus perch and pike-perch	Certified	Russian and Estonian Lake Peipus perch and pike-perch	Default Tree v2.0	1.2.4	Condition 2 UoAs: 1, 2, 5, 6	European perch - 05, Lake Peipus	Miscellaneous freshwater fishes	Seine Nets - Boat or vessel seines - Danish seines	Estonia	The ultimate values of non-commercial and IUU removals and discard are determined_x000D_ by expert review of fishery scientists of both countries at joint ERFC, but the_x000D_ Assessment Team has not seen a clear explanation of the methodology employed._x000D_ Essentially, it is clear that the assessment identifies major sources of uncertainty, but_x000D_ it is not apparent how this uncertainty i…	The Client will cooperate with Logi-F to fulfill the action plan according to time frames_x000D_ and details presented in Logi-F Estonian assessment (MC 2017)._x000D_ Although the condition is set for Estonian side of fishery, the Client will include in the_x000D_ report also the relevant general information published by Russian authorities_x000D_ The Client, in consultations with Estonian Fisher…	Milestones and resulting scores will be as determined in the Logi-F Estonian_x000D_ assessment (MC 2017). This will mean meeting the Logi-F Year 1, 2 and 3 milestones_x000D_ at the first surveillance audit, expected early in 2021._x000D_ 1st surveillance:_x000D_ Design a scientifically valid approach to determine the sources and amounts of perch_x000D_ mortality associated with recreational and I…	Open	transparent
Russian and Estonian Lake Peipus perch and pike-perch	Certified	Russian and Estonian Lake Peipus perch and pike-perch	Default Tree v2.0	1.2.4	Condition 2 UoAs: 1, 2, 5, 6	European perch - 05, Lake Peipus	Miscellaneous freshwater fishes	Miscellaneous Gear	Russia	The ultimate values of non-commercial and IUU removals and discard are determined_x000D_ by expert review of fishery scientists of both countries at joint ERFC, but the_x000D_ Assessment Team has not seen a clear explanation of the methodology employed._x000D_ Essentially, it is clear that the assessment identifies major sources of uncertainty, but_x000D_ it is not apparent how this uncertainty i…	The Client will cooperate with Logi-F to fulfill the action plan according to time frames_x000D_ and details presented in Logi-F Estonian assessment (MC 2017)._x000D_ Although the condition is set for Estonian side of fishery, the Client will include in the_x000D_ report also the relevant general information published by Russian authorities_x000D_ The Client, in consultations with Estonian Fisher…	Milestones and resulting scores will be as determined in the Logi-F Estonian_x000D_ assessment (MC 2017). This will mean meeting the Logi-F Year 1, 2 and 3 milestones_x000D_ at the first surveillance audit, expected early in 2021._x000D_ 1st surveillance:_x000D_ Design a scientifically valid approach to determine the sources and amounts of perch_x000D_ mortality associated with recreational and I…	Open	transparent
Russian and Estonian Lake Peipus perch and pike-perch	Certified	Russian and Estonian Lake Peipus perch and pike-perch	Default Tree v2.0	1.2.4	Condition 2 UoAs: 1, 2, 5, 6	European perch - 05, Lake Peipus	Miscellaneous freshwater fishes	Seine Nets - Boat or vessel seines - Danish seines	Russia	The ultimate values of non-commercial and IUU removals and discard are determined_x000D_ by expert review of fishery scientists of both countries at joint ERFC, but the_x000D_ Assessment Team has not seen a clear explanation of the methodology employed._x000D_ Essentially, it is clear that the assessment identifies major sources of uncertainty, but_x000D_ it is not apparent how this uncertainty i…	The Client will cooperate with Logi-F to fulfill the action plan according to time frames_x000D_ and details presented in Logi-F Estonian assessment (MC 2017)._x000D_ Although the condition is set for Estonian side of fishery, the Client will include in the_x000D_ report also the relevant general information published by Russian authorities_x000D_ The Client, in consultations with Estonian Fisher…	Milestones and resulting scores will be as determined in the Logi-F Estonian_x000D_ assessment (MC 2017). This will mean meeting the Logi-F Year 1, 2 and 3 milestones_x000D_ at the first surveillance audit, expected early in 2021._x000D_ 1st surveillance:_x000D_ Design a scientifically valid approach to determine the sources and amounts of perch_x000D_ mortality associated with recreational and I…	Open	transparent
PNG Fishing Industry Association’s purse seine Skipjack & Yellowfin Tuna Fishery	Certified	PNG Fishing Industry Association’s purse seine Skipjack & Yellowfin Tuna Fishery	Default Tree v2.0	3.1.2	Condition 3-1: Management system	Yellowfin tuna Central Western Pacific	Tunas, bonitos, billfishes	Surrounding Nets - With purse lines (purse seines)	Free-school	See rationale for PI 3.1.2 b: _x000D_ By the fourth surveillance audit, provide evidence to demonstrate that clear and transparent_x000D_ processes exist at the national management level to regularly seek and accept Ã¢â‚¬Å“relevant_x000D_ informationÃ¢â‚¬Â provided via consultative processes and that any such information is_x000D_ considered in management decision making at national and regional…	See milestones	Surveillance (2021): work with NFA to develop a basic proposal/plan for improvement of the_x000D_ consultation processes, to ensure the condition is closed by the 4th year of certification. The_x000D_ Plan should identify: consultation mechanisms, which sources/parties will be involved in the_x000D_ consultation processes and the frequency with which the consultation processes will seek_x000D_ an…	Open	transparent
PNG Fishing Industry Association’s purse seine Skipjack & Yellowfin Tuna Fishery	Certified	PNG Fishing Industry Association’s purse seine Skipjack & Yellowfin Tuna Fishery	Default Tree v2.0	3.1.2	Condition 3-1: Management system	Yellowfin tuna Central Western Pacific	Tunas, bonitos, billfishes	Surrounding Nets - With purse lines (purse seines)	FAD	See rationale for PI 3.1.2 b: _x000D_ By the fourth surveillance audit, provide evidence to demonstrate that clear and transparent_x000D_ processes exist at the national management level to regularly seek and accept Ã¢â‚¬Å“relevant_x000D_ informationÃ¢â‚¬Â provided via consultative processes and that any such information is_x000D_ considered in management decision making at national and regional…	See milestones	Surveillance (2021): work with NFA to develop a basic proposal/plan for improvement of the_x000D_ consultation processes, to ensure the condition is closed by the 4th year of certification. The_x000D_ Plan should identify: consultation mechanisms, which sources/parties will be involved in the_x000D_ consultation processes and the frequency with which the consultation processes will seek_x000D_ an…	Open	transparent
PNG Fishing Industry Association’s purse seine Skipjack & Yellowfin Tuna Fishery	Certified	PNG Fishing Industry Association’s purse seine Skipjack & Yellowfin Tuna Fishery	Default Tree v2.0	3.1.2	Condition 3-1: Management system	Skipjack tuna Central Western Pacific	Tunas, bonitos, billfishes	Surrounding Nets - With purse lines (purse seines)	Free-school	See rationale for PI 3.1.2 b: _x000D_ By the fourth surveillance audit, provide evidence to demonstrate that clear and transparent_x000D_ processes exist at the national management level to regularly seek and accept Ã¢â‚¬Å“relevant_x000D_ informationÃ¢â‚¬Â provided via consultative processes and that any such information is_x000D_ considered in management decision making at national and regional…	See milestones	Surveillance (2021): work with NFA to develop a basic proposal/plan for improvement of the_x000D_ consultation processes, to ensure the condition is closed by the 4th year of certification. The_x000D_ Plan should identify: consultation mechanisms, which sources/parties will be involved in the_x000D_ consultation processes and the frequency with which the consultation processes will seek_x000D_ an…	Open	transparent
PNG Fishing Industry Association’s purse seine Skipjack & Yellowfin Tuna Fishery	Certified	PNG Fishing Industry Association’s purse seine Skipjack & Yellowfin Tuna Fishery	Default Tree v2.0	3.1.2	Condition 3-1: Management system	Skipjack tuna Central Western Pacific	Tunas, bonitos, billfishes	Surrounding Nets - With purse lines (purse seines)	FAD	See rationale for PI 3.1.2 b: _x000D_ By the fourth surveillance audit, provide evidence to demonstrate that clear and transparent_x000D_ processes exist at the national management level to regularly seek and accept Ã¢â‚¬Å“relevant_x000D_ informationÃ¢â‚¬Â provided via consultative processes and that any such information is_x000D_ considered in management decision making at national and regional…	See milestones	Surveillance (2021): work with NFA to develop a basic proposal/plan for improvement of the_x000D_ consultation processes, to ensure the condition is closed by the 4th year of certification. The_x000D_ Plan should identify: consultation mechanisms, which sources/parties will be involved in the_x000D_ consultation processes and the frequency with which the consultation processes will seek_x000D_ an…	Open	transparent
Alaska salmon	Certified	Alaska salmon	Default Tree v2.0 [Salmon]	3.2.2	Condition 9: Decision making	Chinook(=Spring=King) salmon-SE Alaska	Salmons, trouts, smelts	Gillnets And Entangling Nets - Driftnets	SEAK	While ADFG decision-making processes are generally responsive to serious issues identified through research, monitoring, evaluation and consultation, it is not clear that they do so for all Ã¢â‚¬Å“serious and other important issuesÃ¢â‚¬Â as required by SG80 scoring issue B. New information presented by stakeholders regarding specific important issues (e.g. straying of chum salmon into West Crawf…	AFDF ACTION: AFDF will work with ADFG and NSRAA to document evidence of actions taken in response to new and unexpected information related to LCI and WCI hatchery strays. Additionally, AFDF will report on ADFGÃ¢â‚¬â„¢s progress towards implementation of the proposal presented at the March 7th, 2020 BOF Hatchery Committee Meeting, which outlined a third-party convening of a working group of agenc…	By the 2nd annual surveillance (around November 2020) demonstrate that a plan is in place to ensure the management system can respond to serious and other important issues and uses the precautionary approach in decision-making as issues arise through research, monitoring, evaluation and consultation. By the 3rd annual surveillance audit (around November 2021) demonstrate that this plan is being c…	Open	transparent
Alaska salmon	Certified	Alaska salmon	Default Tree v2.0 [Salmon]	3.2.2	Condition 9: Decision making	Sockeye(=Red) salmon- Yakutat	Salmons, trouts, smelts	Gillnets And Entangling Nets - Gillnets	Yakutat	While ADFG decision-making processes are generally responsive to serious issues identified through research, monitoring, evaluation and consultation, it is not clear that they do so for all Ã¢â‚¬Å“serious and other important issuesÃ¢â‚¬Â as required by SG80 scoring issue B. New information presented by stakeholders regarding specific important issues (e.g. straying of chum salmon into West Crawf…	AFDF ACTION: AFDF will work with ADFG and NSRAA to document evidence of actions taken in response to new and unexpected information related to LCI and WCI hatchery strays. Additionally, AFDF will report on ADFGÃ¢â‚¬â„¢s progress towards implementation of the proposal presented at the March 7th, 2020 BOF Hatchery Committee Meeting, which outlined a third-party convening of a working group of agenc…	By the 2nd annual surveillance (around November 2020) demonstrate that a plan is in place to ensure the management system can respond to serious and other important issues and uses the precautionary approach in decision-making as issues arise through research, monitoring, evaluation and consultation. By the 3rd annual surveillance audit (around November 2021) demonstrate that this plan is being c…	Open	transparent
Alaska salmon	Certified	Alaska salmon	Default Tree v2.0 [Salmon]	3.2.2	Condition 9: Decision making	Sockeye(=Red) salmon- Yakutat	Salmons, trouts, smelts	Hooks And Lines - Trolling lines	Yakutat	While ADFG decision-making processes are generally responsive to serious issues identified through research, monitoring, evaluation and consultation, it is not clear that they do so for all Ã¢â‚¬Å“serious and other important issuesÃ¢â‚¬Â as required by SG80 scoring issue B. New information presented by stakeholders regarding specific important issues (e.g. straying of chum salmon into West Crawf…	AFDF ACTION: AFDF will work with ADFG and NSRAA to document evidence of actions taken in response to new and unexpected information related to LCI and WCI hatchery strays. Additionally, AFDF will report on ADFGÃ¢â‚¬â„¢s progress towards implementation of the proposal presented at the March 7th, 2020 BOF Hatchery Committee Meeting, which outlined a third-party convening of a working group of agenc…	By the 2nd annual surveillance (around November 2020) demonstrate that a plan is in place to ensure the management system can respond to serious and other important issues and uses the precautionary approach in decision-making as issues arise through research, monitoring, evaluation and consultation. By the 3rd annual surveillance audit (around November 2021) demonstrate that this plan is being c…	Open	transparent
Alaska salmon	Certified	Alaska salmon	Default Tree v2.0 [Salmon]	3.2.2	Condition 9: Decision making	Sockeye (=Red) salmon-Prince William Sound	Salmons, trouts, smelts	Gillnets And Entangling Nets - Gillnets	Prince William Sound	While ADFG decision-making processes are generally responsive to serious issues identified through research, monitoring, evaluation and consultation, it is not clear that they do so for all Ã¢â‚¬Å“serious and other important issuesÃ¢â‚¬Â as required by SG80 scoring issue B. New information presented by stakeholders regarding specific important issues (e.g. straying of chum salmon into West Crawf…	AFDF ACTION: AFDF will work with ADFG and NSRAA to document evidence of actions taken in response to new and unexpected information related to LCI and WCI hatchery strays. Additionally, AFDF will report on ADFGÃ¢â‚¬â„¢s progress towards implementation of the proposal presented at the March 7th, 2020 BOF Hatchery Committee Meeting, which outlined a third-party convening of a working group of agenc…	By the 2nd annual surveillance (around November 2020) demonstrate that a plan is in place to ensure the management system can respond to serious and other important issues and uses the precautionary approach in decision-making as issues arise through research, monitoring, evaluation and consultation. By the 3rd annual surveillance audit (around November 2021) demonstrate that this plan is being c…	Open	transparent
Waterhen Lake walleye and northern pike commercial gillnet fishery	Certified	Manitoba boreal forest lakes walleye, northern pike, yellow perch, lake whitefish, and lake cisco commercial gillnet fishery	Default Tree v2.0	3.1.2	Condition 3: Management system	Walleye-Waterhen Lake, Canada	Miscellaneous freshwater fishes	Gillnets And Entangling Nets - Gillnets	Waterhen Lake - Walleye	SIb walleye and northern pike:_x000D_ In Manitoba, ad hoc meetings with stakeholders provide the forum for the main_x000D_ affected parties to inform the management system. The fishery meets SG60._x000D_ Local fishery management planning involves consultation with user groups_x000D_ including commercial and recreational fishers and other commercial users of the_x000D_ fishery resources. As indica…	By Spring 2021: Client will keep a written record of dates and events in the_x000D_ Waterhen fishery concerning overtures for consultation by all sectors,_x000D_ information received, and how any information was considered. The records will_x000D_ form an evergreen file available for inspection by CABs at annual audits. Client_x000D_ will provide annual updates to the CAB, and new information wil…	By the Spring 2021 surveillance, the client will have a plan in place for_x000D_ consultation processes that regularly seek and accept relevant information,_x000D_ including local knowledge, and that demonstrate consideration of the_x000D_ information obtained._x000D_ Resulting score: No change in score anticipated at this stage._x000D_ By the Spring 2022 surveillance, the client will demonstrate…	Open	transparent
Waterhen Lake walleye and northern pike commercial gillnet fishery	Certified	Manitoba boreal forest lakes walleye, northern pike, yellow perch, lake whitefish, and lake cisco commercial gillnet fishery	Default Tree v2.0	3.1.2	Condition 3: Management system	Northern Pike- Waterhen Lake, Canada	Miscellaneous freshwater fishes	Gillnets And Entangling Nets - Gillnets	Waterhen Lake - Northern Pike	SIb walleye and northern pike:_x000D_ In Manitoba, ad hoc meetings with stakeholders provide the forum for the main_x000D_ affected parties to inform the management system. The fishery meets SG60._x000D_ Local fishery management planning involves consultation with user groups_x000D_ including commercial and recreational fishers and other commercial users of the_x000D_ fishery resources. As indica…	By Spring 2021: Client will keep a written record of dates and events in the_x000D_ Waterhen fishery concerning overtures for consultation by all sectors,_x000D_ information received, and how any information was considered. The records will_x000D_ form an evergreen file available for inspection by CABs at annual audits. Client_x000D_ will provide annual updates to the CAB, and new information wil…	By the Spring 2021 surveillance, the client will have a plan in place for_x000D_ consultation processes that regularly seek and accept relevant information,_x000D_ including local knowledge, and that demonstrate consideration of the_x000D_ information obtained._x000D_ Resulting score: No change in score anticipated at this stage._x000D_ By the Spring 2022 surveillance, the client will demonstrate…	Open	transparent
Alaska salmon	Certified	Alaska salmon	Default Tree v2.0 [Salmon]	3.2.2	Condition 9: Decision making	Sockeye (=Red) salmon-Prince William Sound	Salmons, trouts, smelts	Seine Nets	Prince William Sound	While ADFG decision-making processes are generally responsive to serious issues identified through research, monitoring, evaluation and consultation, it is not clear that they do so for all Ã¢â‚¬Å“serious and other important issuesÃ¢â‚¬Â as required by SG80 scoring issue B. New information presented by stakeholders regarding specific important issues (e.g. straying of chum salmon into West Crawf…	AFDF ACTION: AFDF will work with ADFG and NSRAA to document evidence of actions taken in response to new and unexpected information related to LCI and WCI hatchery strays. Additionally, AFDF will report on ADFGÃ¢â‚¬â„¢s progress towards implementation of the proposal presented at the March 7th, 2020 BOF Hatchery Committee Meeting, which outlined a third-party convening of a working group of agenc…	By the 2nd annual surveillance (around November 2020) demonstrate that a plan is in place to ensure the management system can respond to serious and other important issues and uses the precautionary approach in decision-making as issues arise through research, monitoring, evaluation and consultation. By the 3rd annual surveillance audit (around November 2021) demonstrate that this plan is being c…	Open	transparent
Alaska salmon	Certified	Alaska salmon	Default Tree v2.0 [Salmon]	3.2.2	Condition 9: Decision making	Sockeye (=Red) salmon-Prince William Sound	Salmons, trouts, smelts	Gillnets And Entangling Nets - Driftnets	Prince William Sound	While ADFG decision-making processes are generally responsive to serious issues identified through research, monitoring, evaluation and consultation, it is not clear that they do so for all Ã¢â‚¬Å“serious and other important issuesÃ¢â‚¬Â as required by SG80 scoring issue B. New information presented by stakeholders regarding specific important issues (e.g. straying of chum salmon into West Crawf…	AFDF ACTION: AFDF will work with ADFG and NSRAA to document evidence of actions taken in response to new and unexpected information related to LCI and WCI hatchery strays. Additionally, AFDF will report on ADFGÃ¢â‚¬â„¢s progress towards implementation of the proposal presented at the March 7th, 2020 BOF Hatchery Committee Meeting, which outlined a third-party convening of a working group of agenc…	By the 2nd annual surveillance (around November 2020) demonstrate that a plan is in place to ensure the management system can respond to serious and other important issues and uses the precautionary approach in decision-making as issues arise through research, monitoring, evaluation and consultation. By the 3rd annual surveillance audit (around November 2021) demonstrate that this plan is being c…	Open	transparent
Alaska salmon	Certified	Alaska salmon	Default Tree v2.0 [Salmon]	3.2.2	Condition 9: Decision making	Sockeye(=Red) salmon- Copper/Bering District	Salmons, trouts, smelts	Gillnets And Entangling Nets - Driftnets	Copper/Bering District	While ADFG decision-making processes are generally responsive to serious issues identified through research, monitoring, evaluation and consultation, it is not clear that they do so for all Ã¢â‚¬Å“serious and other important issuesÃ¢â‚¬Â as required by SG80 scoring issue B. New information presented by stakeholders regarding specific important issues (e.g. straying of chum salmon into West Crawf…	AFDF ACTION: AFDF will work with ADFG and NSRAA to document evidence of actions taken in response to new and unexpected information related to LCI and WCI hatchery strays. Additionally, AFDF will report on ADFGÃ¢â‚¬â„¢s progress towards implementation of the proposal presented at the March 7th, 2020 BOF Hatchery Committee Meeting, which outlined a third-party convening of a working group of agenc…	By the 2nd annual surveillance (around November 2020) demonstrate that a plan is in place to ensure the management system can respond to serious and other important issues and uses the precautionary approach in decision-making as issues arise through research, monitoring, evaluation and consultation. By the 3rd annual surveillance audit (around November 2021) demonstrate that this plan is being c…	Open	transparent
Alaska salmon	Certified	Alaska salmon	Default Tree v2.0 [Salmon]	3.2.2	Condition 9: Decision making	Sockeye(=Red) salmon- Lower Cook Inlet	Salmons, trouts, smelts	Surrounding Nets - With purse lines (purse seines)	Lower Cook Inlet	While ADFG decision-making processes are generally responsive to serious issues identified through research, monitoring, evaluation and consultation, it is not clear that they do so for all Ã¢â‚¬Å“serious and other important issuesÃ¢â‚¬Â as required by SG80 scoring issue B. New information presented by stakeholders regarding specific important issues (e.g. straying of chum salmon into West Crawf…	AFDF ACTION: AFDF will work with ADFG and NSRAA to document evidence of actions taken in response to new and unexpected information related to LCI and WCI hatchery strays. Additionally, AFDF will report on ADFGÃ¢â‚¬â„¢s progress towards implementation of the proposal presented at the March 7th, 2020 BOF Hatchery Committee Meeting, which outlined a third-party convening of a working group of agenc…	By the 2nd annual surveillance (around November 2020) demonstrate that a plan is in place to ensure the management system can respond to serious and other important issues and uses the precautionary approach in decision-making as issues arise through research, monitoring, evaluation and consultation. By the 3rd annual surveillance audit (around November 2021) demonstrate that this plan is being c…	Open	transparent
Alaska salmon	Certified	Alaska salmon	Default Tree v2.0 [Salmon]	3.2.2	Condition 9: Decision making	Sockeye(=Red) salmon- Lower Cook Inlet	Salmons, trouts, smelts	Gillnets And Entangling Nets - Gillnets	Lower Cook Inlet	While ADFG decision-making processes are generally responsive to serious issues identified through research, monitoring, evaluation and consultation, it is not clear that they do so for all Ã¢â‚¬Å“serious and other important issuesÃ¢â‚¬Â as required by SG80 scoring issue B. New information presented by stakeholders regarding specific important issues (e.g. straying of chum salmon into West Crawf…	AFDF ACTION: AFDF will work with ADFG and NSRAA to document evidence of actions taken in response to new and unexpected information related to LCI and WCI hatchery strays. Additionally, AFDF will report on ADFGÃ¢â‚¬â„¢s progress towards implementation of the proposal presented at the March 7th, 2020 BOF Hatchery Committee Meeting, which outlined a third-party convening of a working group of agenc…	By the 2nd annual surveillance (around November 2020) demonstrate that a plan is in place to ensure the management system can respond to serious and other important issues and uses the precautionary approach in decision-making as issues arise through research, monitoring, evaluation and consultation. By the 3rd annual surveillance audit (around November 2021) demonstrate that this plan is being c…	Open	transparent
Alaska salmon	Certified	Alaska salmon	Default Tree v2.0 [Salmon]	3.2.2	Condition 9: Decision making	Sockeye(=Red) salmon- Upper Cook Inlet	Salmons, trouts, smelts	Gillnets And Entangling Nets - Driftnets	Upper Cook Inlet	While ADFG decision-making processes are generally responsive to serious issues identified through research, monitoring, evaluation and consultation, it is not clear that they do so for all Ã¢â‚¬Å“serious and other important issuesÃ¢â‚¬Â as required by SG80 scoring issue B. New information presented by stakeholders regarding specific important issues (e.g. straying of chum salmon into West Crawf…	AFDF ACTION: AFDF will work with ADFG and NSRAA to document evidence of actions taken in response to new and unexpected information related to LCI and WCI hatchery strays. Additionally, AFDF will report on ADFGÃ¢â‚¬â„¢s progress towards implementation of the proposal presented at the March 7th, 2020 BOF Hatchery Committee Meeting, which outlined a third-party convening of a working group of agenc…	By the 2nd annual surveillance (around November 2020) demonstrate that a plan is in place to ensure the management system can respond to serious and other important issues and uses the precautionary approach in decision-making as issues arise through research, monitoring, evaluation and consultation. By the 3rd annual surveillance audit (around November 2021) demonstrate that this plan is being c…	Open	transparent
Alaska salmon	Certified	Alaska salmon	Default Tree v2.0 [Salmon]	3.2.2	Condition 9: Decision making	Sockeye(=Red) salmon- Upper Cook Inlet	Salmons, trouts, smelts	Gillnets And Entangling Nets - Gillnets	Upper Cook Inlet	While ADFG decision-making processes are generally responsive to serious issues identified through research, monitoring, evaluation and consultation, it is not clear that they do so for all Ã¢â‚¬Å“serious and other important issuesÃ¢â‚¬Â as required by SG80 scoring issue B. New information presented by stakeholders regarding specific important issues (e.g. straying of chum salmon into West Crawf…	AFDF ACTION: AFDF will work with ADFG and NSRAA to document evidence of actions taken in response to new and unexpected information related to LCI and WCI hatchery strays. Additionally, AFDF will report on ADFGÃ¢â‚¬â„¢s progress towards implementation of the proposal presented at the March 7th, 2020 BOF Hatchery Committee Meeting, which outlined a third-party convening of a working group of agenc…	By the 2nd annual surveillance (around November 2020) demonstrate that a plan is in place to ensure the management system can respond to serious and other important issues and uses the precautionary approach in decision-making as issues arise through research, monitoring, evaluation and consultation. By the 3rd annual surveillance audit (around November 2021) demonstrate that this plan is being c…	Open	transparent
Alaska salmon	Certified	Alaska salmon	Default Tree v2.0 [Salmon]	3.2.2	Condition 9: Decision making	Sockeye(=Red) salmon- Bristol Bay	Salmons, trouts, smelts	Gillnets And Entangling Nets - Driftnets	Bristol Bay	While ADFG decision-making processes are generally responsive to serious issues identified through research, monitoring, evaluation and consultation, it is not clear that they do so for all Ã¢â‚¬Å“serious and other important issuesÃ¢â‚¬Â as required by SG80 scoring issue B. New information presented by stakeholders regarding specific important issues (e.g. straying of chum salmon into West Crawf…	AFDF ACTION: AFDF will work with ADFG and NSRAA to document evidence of actions taken in response to new and unexpected information related to LCI and WCI hatchery strays. Additionally, AFDF will report on ADFGÃ¢â‚¬â„¢s progress towards implementation of the proposal presented at the March 7th, 2020 BOF Hatchery Committee Meeting, which outlined a third-party convening of a working group of agenc…	By the 2nd annual surveillance (around November 2020) demonstrate that a plan is in place to ensure the management system can respond to serious and other important issues and uses the precautionary approach in decision-making as issues arise through research, monitoring, evaluation and consultation. By the 3rd annual surveillance audit (around November 2021) demonstrate that this plan is being c…	Open	transparent
Alaska salmon	Certified	Alaska salmon	Default Tree v2.0 [Salmon]	3.2.2	Condition 9: Decision making	Sockeye(=Red) salmon- Bristol Bay	Salmons, trouts, smelts	Gillnets And Entangling Nets - Gillnets	Bristol Bay	While ADFG decision-making processes are generally responsive to serious issues identified through research, monitoring, evaluation and consultation, it is not clear that they do so for all Ã¢â‚¬Å“serious and other important issuesÃ¢â‚¬Â as required by SG80 scoring issue B. New information presented by stakeholders regarding specific important issues (e.g. straying of chum salmon into West Crawf…	AFDF ACTION: AFDF will work with ADFG and NSRAA to document evidence of actions taken in response to new and unexpected information related to LCI and WCI hatchery strays. Additionally, AFDF will report on ADFGÃ¢â‚¬â„¢s progress towards implementation of the proposal presented at the March 7th, 2020 BOF Hatchery Committee Meeting, which outlined a third-party convening of a working group of agenc…	By the 2nd annual surveillance (around November 2020) demonstrate that a plan is in place to ensure the management system can respond to serious and other important issues and uses the precautionary approach in decision-making as issues arise through research, monitoring, evaluation and consultation. By the 3rd annual surveillance audit (around November 2021) demonstrate that this plan is being c…	Open	transparent
Alaska salmon	Certified	Alaska salmon	Default Tree v2.0 [Salmon]	3.2.2	Condition 9: Decision making	Sockeye(=Red) salmon- Kuskokwim	Salmons, trouts, smelts	Gillnets And Entangling Nets - Driftnets	Kuskokwim	While ADFG decision-making processes are generally responsive to serious issues identified through research, monitoring, evaluation and consultation, it is not clear that they do so for all Ã¢â‚¬Å“serious and other important issuesÃ¢â‚¬Â as required by SG80 scoring issue B. New information presented by stakeholders regarding specific important issues (e.g. straying of chum salmon into West Crawf…	AFDF ACTION: AFDF will work with ADFG and NSRAA to document evidence of actions taken in response to new and unexpected information related to LCI and WCI hatchery strays. Additionally, AFDF will report on ADFGÃ¢â‚¬â„¢s progress towards implementation of the proposal presented at the March 7th, 2020 BOF Hatchery Committee Meeting, which outlined a third-party convening of a working group of agenc…	By the 2nd annual surveillance (around November 2020) demonstrate that a plan is in place to ensure the management system can respond to serious and other important issues and uses the precautionary approach in decision-making as issues arise through research, monitoring, evaluation and consultation. By the 3rd annual surveillance audit (around November 2021) demonstrate that this plan is being c…	Open	transparent
Alaska salmon	Certified	Alaska salmon	Default Tree v2.0 [Salmon]	3.2.2	Condition 9: Decision making	Sockeye(=Red) salmon- Kuskokwim	Salmons, trouts, smelts	Gillnets And Entangling Nets - Gillnets	Kuskokwim	While ADFG decision-making processes are generally responsive to serious issues identified through research, monitoring, evaluation and consultation, it is not clear that they do so for all Ã¢â‚¬Å“serious and other important issuesÃ¢â‚¬Â as required by SG80 scoring issue B. New information presented by stakeholders regarding specific important issues (e.g. straying of chum salmon into West Crawf…	AFDF ACTION: AFDF will work with ADFG and NSRAA to document evidence of actions taken in response to new and unexpected information related to LCI and WCI hatchery strays. Additionally, AFDF will report on ADFGÃ¢â‚¬â„¢s progress towards implementation of the proposal presented at the March 7th, 2020 BOF Hatchery Committee Meeting, which outlined a third-party convening of a working group of agenc…	By the 2nd annual surveillance (around November 2020) demonstrate that a plan is in place to ensure the management system can respond to serious and other important issues and uses the precautionary approach in decision-making as issues arise through research, monitoring, evaluation and consultation. By the 3rd annual surveillance audit (around November 2021) demonstrate that this plan is being c…	Open	transparent
Alaska salmon	Certified	Alaska salmon	Default Tree v2.0 [Salmon]	3.2.2	Condition 9: Decision making	Sockeye(=Red) salmon- Kodiak	Salmons, trouts, smelts	Gillnets And Entangling Nets - Gillnets	Kodiak	While ADFG decision-making processes are generally responsive to serious issues identified through research, monitoring, evaluation and consultation, it is not clear that they do so for all Ã¢â‚¬Å“serious and other important issuesÃ¢â‚¬Â as required by SG80 scoring issue B. New information presented by stakeholders regarding specific important issues (e.g. straying of chum salmon into West Crawf…	AFDF ACTION: AFDF will work with ADFG and NSRAA to document evidence of actions taken in response to new and unexpected information related to LCI and WCI hatchery strays. Additionally, AFDF will report on ADFGÃ¢â‚¬â„¢s progress towards implementation of the proposal presented at the March 7th, 2020 BOF Hatchery Committee Meeting, which outlined a third-party convening of a working group of agenc…	By the 2nd annual surveillance (around November 2020) demonstrate that a plan is in place to ensure the management system can respond to serious and other important issues and uses the precautionary approach in decision-making as issues arise through research, monitoring, evaluation and consultation. By the 3rd annual surveillance audit (around November 2021) demonstrate that this plan is being c…	Open	transparent
Alaska salmon	Certified	Alaska salmon	Default Tree v2.0 [Salmon]	3.2.2	Condition 9: Decision making	Sockeye(=Red) salmon- Chignik	Salmons, trouts, smelts	Surrounding Nets - With purse lines (purse seines)	Chignik	While ADFG decision-making processes are generally responsive to serious issues identified through research, monitoring, evaluation and consultation, it is not clear that they do so for all Ã¢â‚¬Å“serious and other important issuesÃ¢â‚¬Â as required by SG80 scoring issue B. New information presented by stakeholders regarding specific important issues (e.g. straying of chum salmon into West Crawf…	AFDF ACTION: AFDF will work with ADFG and NSRAA to document evidence of actions taken in response to new and unexpected information related to LCI and WCI hatchery strays. Additionally, AFDF will report on ADFGÃ¢â‚¬â„¢s progress towards implementation of the proposal presented at the March 7th, 2020 BOF Hatchery Committee Meeting, which outlined a third-party convening of a working group of agenc…	By the 2nd annual surveillance (around November 2020) demonstrate that a plan is in place to ensure the management system can respond to serious and other important issues and uses the precautionary approach in decision-making as issues arise through research, monitoring, evaluation and consultation. By the 3rd annual surveillance audit (around November 2021) demonstrate that this plan is being c…	Open	transparent
Alaska salmon	Certified	Alaska salmon	Default Tree v2.0 [Salmon]	3.2.2	Condition 9: Decision making	Sockeye(=Red) salmon- Peninsula/Aleutian Is.	Salmons, trouts, smelts	Surrounding Nets - With purse lines (purse seines)	Peninsula	While ADFG decision-making processes are generally responsive to serious issues identified through research, monitoring, evaluation and consultation, it is not clear that they do so for all Ã¢â‚¬Å“serious and other important issuesÃ¢â‚¬Â as required by SG80 scoring issue B. New information presented by stakeholders regarding specific important issues (e.g. straying of chum salmon into West Crawf…	AFDF ACTION: AFDF will work with ADFG and NSRAA to document evidence of actions taken in response to new and unexpected information related to LCI and WCI hatchery strays. Additionally, AFDF will report on ADFGÃ¢â‚¬â„¢s progress towards implementation of the proposal presented at the March 7th, 2020 BOF Hatchery Committee Meeting, which outlined a third-party convening of a working group of agenc…	By the 2nd annual surveillance (around November 2020) demonstrate that a plan is in place to ensure the management system can respond to serious and other important issues and uses the precautionary approach in decision-making as issues arise through research, monitoring, evaluation and consultation. By the 3rd annual surveillance audit (around November 2021) demonstrate that this plan is being c…	Open	transparent
Alaska salmon	Certified	Alaska salmon	Default Tree v2.0 [Salmon]	3.2.2	Condition 9: Decision making	Sockeye(=Red) salmon- Peninsula/Aleutian Is.	Salmons, trouts, smelts	Seine Nets	Peninsula	While ADFG decision-making processes are generally responsive to serious issues identified through research, monitoring, evaluation and consultation, it is not clear that they do so for all Ã¢â‚¬Å“serious and other important issuesÃ¢â‚¬Â as required by SG80 scoring issue B. New information presented by stakeholders regarding specific important issues (e.g. straying of chum salmon into West Crawf…	AFDF ACTION: AFDF will work with ADFG and NSRAA to document evidence of actions taken in response to new and unexpected information related to LCI and WCI hatchery strays. Additionally, AFDF will report on ADFGÃ¢â‚¬â„¢s progress towards implementation of the proposal presented at the March 7th, 2020 BOF Hatchery Committee Meeting, which outlined a third-party convening of a working group of agenc…	By the 2nd annual surveillance (around November 2020) demonstrate that a plan is in place to ensure the management system can respond to serious and other important issues and uses the precautionary approach in decision-making as issues arise through research, monitoring, evaluation and consultation. By the 3rd annual surveillance audit (around November 2021) demonstrate that this plan is being c…	Open	transparent
Alaska salmon	Certified	Alaska salmon	Default Tree v2.0 [Salmon]	3.2.2	Condition 9: Decision making	Sockeye(=Red) salmon- Peninsula/Aleutian Is.	Salmons, trouts, smelts	Gillnets And Entangling Nets - Driftnets	Peninsula	While ADFG decision-making processes are generally responsive to serious issues identified through research, monitoring, evaluation and consultation, it is not clear that they do so for all Ã¢â‚¬Å“serious and other important issuesÃ¢â‚¬Â as required by SG80 scoring issue B. New information presented by stakeholders regarding specific important issues (e.g. straying of chum salmon into West Crawf…	AFDF ACTION: AFDF will work with ADFG and NSRAA to document evidence of actions taken in response to new and unexpected information related to LCI and WCI hatchery strays. Additionally, AFDF will report on ADFGÃ¢â‚¬â„¢s progress towards implementation of the proposal presented at the March 7th, 2020 BOF Hatchery Committee Meeting, which outlined a third-party convening of a working group of agenc…	By the 2nd annual surveillance (around November 2020) demonstrate that a plan is in place to ensure the management system can respond to serious and other important issues and uses the precautionary approach in decision-making as issues arise through research, monitoring, evaluation and consultation. By the 3rd annual surveillance audit (around November 2021) demonstrate that this plan is being c…	Open	transparent
Alaska salmon	Certified	Alaska salmon	Default Tree v2.0 [Salmon]	3.2.2	Condition 9: Decision making	Sockeye(=Red) salmon- Peninsula/Aleutian Is.	Salmons, trouts, smelts	Gillnets And Entangling Nets - Gillnets	Peninsula	While ADFG decision-making processes are generally responsive to serious issues identified through research, monitoring, evaluation and consultation, it is not clear that they do so for all Ã¢â‚¬Å“serious and other important issuesÃ¢â‚¬Â as required by SG80 scoring issue B. New information presented by stakeholders regarding specific important issues (e.g. straying of chum salmon into West Crawf…	AFDF ACTION: AFDF will work with ADFG and NSRAA to document evidence of actions taken in response to new and unexpected information related to LCI and WCI hatchery strays. Additionally, AFDF will report on ADFGÃ¢â‚¬â„¢s progress towards implementation of the proposal presented at the March 7th, 2020 BOF Hatchery Committee Meeting, which outlined a third-party convening of a working group of agenc…	By the 2nd annual surveillance (around November 2020) demonstrate that a plan is in place to ensure the management system can respond to serious and other important issues and uses the precautionary approach in decision-making as issues arise through research, monitoring, evaluation and consultation. By the 3rd annual surveillance audit (around November 2021) demonstrate that this plan is being c…	Open	transparent
Alaska salmon	Certified	Alaska salmon	Default Tree v2.0 [Salmon]	3.2.2	Condition 9: Decision making	Chinook(=Spring=King) salmon- Yakutat	Salmons, trouts, smelts	Gillnets And Entangling Nets - Gillnets	Yakutat	While ADFG decision-making processes are generally responsive to serious issues identified through research, monitoring, evaluation and consultation, it is not clear that they do so for all Ã¢â‚¬Å“serious and other important issuesÃ¢â‚¬Â as required by SG80 scoring issue B. New information presented by stakeholders regarding specific important issues (e.g. straying of chum salmon into West Crawf…	AFDF ACTION: AFDF will work with ADFG and NSRAA to document evidence of actions taken in response to new and unexpected information related to LCI and WCI hatchery strays. Additionally, AFDF will report on ADFGÃ¢â‚¬â„¢s progress towards implementation of the proposal presented at the March 7th, 2020 BOF Hatchery Committee Meeting, which outlined a third-party convening of a working group of agenc…	By the 2nd annual surveillance (around November 2020) demonstrate that a plan is in place to ensure the management system can respond to serious and other important issues and uses the precautionary approach in decision-making as issues arise through research, monitoring, evaluation and consultation. By the 3rd annual surveillance audit (around November 2021) demonstrate that this plan is being c…	Open	transparent
Alaska salmon	Certified	Alaska salmon	Default Tree v2.0 [Salmon]	3.2.2	Condition 9: Decision making	Chinook(=Spring=King) salmon- Yakutat	Salmons, trouts, smelts	Hooks And Lines - Trolling lines	Yakutat	While ADFG decision-making processes are generally responsive to serious issues identified through research, monitoring, evaluation and consultation, it is not clear that they do so for all Ã¢â‚¬Å“serious and other important issuesÃ¢â‚¬Â as required by SG80 scoring issue B. New information presented by stakeholders regarding specific important issues (e.g. straying of chum salmon into West Crawf…	AFDF ACTION: AFDF will work with ADFG and NSRAA to document evidence of actions taken in response to new and unexpected information related to LCI and WCI hatchery strays. Additionally, AFDF will report on ADFGÃ¢â‚¬â„¢s progress towards implementation of the proposal presented at the March 7th, 2020 BOF Hatchery Committee Meeting, which outlined a third-party convening of a working group of agenc…	By the 2nd annual surveillance (around November 2020) demonstrate that a plan is in place to ensure the management system can respond to serious and other important issues and uses the precautionary approach in decision-making as issues arise through research, monitoring, evaluation and consultation. By the 3rd annual surveillance audit (around November 2021) demonstrate that this plan is being c…	Open	transparent
Alaska salmon	Certified	Alaska salmon	Default Tree v2.0 [Salmon]	3.2.2	Condition 9: Decision making	Chinook(=Spring=King) salmon- Copper/Bering Districts	Salmons, trouts, smelts	Gillnets And Entangling Nets - Driftnets	Copper/Bering District	While ADFG decision-making processes are generally responsive to serious issues identified through research, monitoring, evaluation and consultation, it is not clear that they do so for all Ã¢â‚¬Å“serious and other important issuesÃ¢â‚¬Â as required by SG80 scoring issue B. New information presented by stakeholders regarding specific important issues (e.g. straying of chum salmon into West Crawf…	AFDF ACTION: AFDF will work with ADFG and NSRAA to document evidence of actions taken in response to new and unexpected information related to LCI and WCI hatchery strays. Additionally, AFDF will report on ADFGÃ¢â‚¬â„¢s progress towards implementation of the proposal presented at the March 7th, 2020 BOF Hatchery Committee Meeting, which outlined a third-party convening of a working group of agenc…	By the 2nd annual surveillance (around November 2020) demonstrate that a plan is in place to ensure the management system can respond to serious and other important issues and uses the precautionary approach in decision-making as issues arise through research, monitoring, evaluation and consultation. By the 3rd annual surveillance audit (around November 2021) demonstrate that this plan is being c…	Open	transparent
Alaska salmon	Certified	Alaska salmon	Default Tree v2.0 [Salmon]	3.2.2	Condition 9: Decision making	Chinook(=Spring=King) salmon- Upper Cook Inlet	Salmons, trouts, smelts	Gillnets And Entangling Nets - Driftnets	Upper Cook Inlet	While ADFG decision-making processes are generally responsive to serious issues identified through research, monitoring, evaluation and consultation, it is not clear that they do so for all Ã¢â‚¬Å“serious and other important issuesÃ¢â‚¬Â as required by SG80 scoring issue B. New information presented by stakeholders regarding specific important issues (e.g. straying of chum salmon into West Crawf…	AFDF ACTION: AFDF will work with ADFG and NSRAA to document evidence of actions taken in response to new and unexpected information related to LCI and WCI hatchery strays. Additionally, AFDF will report on ADFGÃ¢â‚¬â„¢s progress towards implementation of the proposal presented at the March 7th, 2020 BOF Hatchery Committee Meeting, which outlined a third-party convening of a working group of agenc…	By the 2nd annual surveillance (around November 2020) demonstrate that a plan is in place to ensure the management system can respond to serious and other important issues and uses the precautionary approach in decision-making as issues arise through research, monitoring, evaluation and consultation. By the 3rd annual surveillance audit (around November 2021) demonstrate that this plan is being c…	Open	transparent
Alaska salmon	Certified	Alaska salmon	Default Tree v2.0 [Salmon]	3.2.2	Condition 9: Decision making	Chinook(=Spring=King) salmon- Upper Cook Inlet	Salmons, trouts, smelts	Gillnets And Entangling Nets - Gillnets	Upper Cook Inlet	While ADFG decision-making processes are generally responsive to serious issues identified through research, monitoring, evaluation and consultation, it is not clear that they do so for all Ã¢â‚¬Å“serious and other important issuesÃ¢â‚¬Â as required by SG80 scoring issue B. New information presented by stakeholders regarding specific important issues (e.g. straying of chum salmon into West Crawf…	AFDF ACTION: AFDF will work with ADFG and NSRAA to document evidence of actions taken in response to new and unexpected information related to LCI and WCI hatchery strays. Additionally, AFDF will report on ADFGÃ¢â‚¬â„¢s progress towards implementation of the proposal presented at the March 7th, 2020 BOF Hatchery Committee Meeting, which outlined a third-party convening of a working group of agenc…	By the 2nd annual surveillance (around November 2020) demonstrate that a plan is in place to ensure the management system can respond to serious and other important issues and uses the precautionary approach in decision-making as issues arise through research, monitoring, evaluation and consultation. By the 3rd annual surveillance audit (around November 2021) demonstrate that this plan is being c…	Open	transparent
Alaska salmon	Certified	Alaska salmon	Default Tree v2.0 [Salmon]	3.2.2	Condition 9: Decision making	Chinook(=Spring=King) salmon- Bristol Bay	Salmons, trouts, smelts	Gillnets And Entangling Nets - Driftnets	Bristol Bay	While ADFG decision-making processes are generally responsive to serious issues identified through research, monitoring, evaluation and consultation, it is not clear that they do so for all Ã¢â‚¬Å“serious and other important issuesÃ¢â‚¬Â as required by SG80 scoring issue B. New information presented by stakeholders regarding specific important issues (e.g. straying of chum salmon into West Crawf…	AFDF ACTION: AFDF will work with ADFG and NSRAA to document evidence of actions taken in response to new and unexpected information related to LCI and WCI hatchery strays. Additionally, AFDF will report on ADFGÃ¢â‚¬â„¢s progress towards implementation of the proposal presented at the March 7th, 2020 BOF Hatchery Committee Meeting, which outlined a third-party convening of a working group of agenc…	By the 2nd annual surveillance (around November 2020) demonstrate that a plan is in place to ensure the management system can respond to serious and other important issues and uses the precautionary approach in decision-making as issues arise through research, monitoring, evaluation and consultation. By the 3rd annual surveillance audit (around November 2021) demonstrate that this plan is being c…	Open	transparent
Alaska salmon	Certified	Alaska salmon	Default Tree v2.0 [Salmon]	3.2.2	Condition 9: Decision making	Chinook(=Spring=King) salmon- Bristol Bay	Salmons, trouts, smelts	Gillnets And Entangling Nets - Gillnets	Bristol Bay	While ADFG decision-making processes are generally responsive to serious issues identified through research, monitoring, evaluation and consultation, it is not clear that they do so for all Ã¢â‚¬Å“serious and other important issuesÃ¢â‚¬Â as required by SG80 scoring issue B. New information presented by stakeholders regarding specific important issues (e.g. straying of chum salmon into West Crawf…	AFDF ACTION: AFDF will work with ADFG and NSRAA to document evidence of actions taken in response to new and unexpected information related to LCI and WCI hatchery strays. Additionally, AFDF will report on ADFGÃ¢â‚¬â„¢s progress towards implementation of the proposal presented at the March 7th, 2020 BOF Hatchery Committee Meeting, which outlined a third-party convening of a working group of agenc…	By the 2nd annual surveillance (around November 2020) demonstrate that a plan is in place to ensure the management system can respond to serious and other important issues and uses the precautionary approach in decision-making as issues arise through research, monitoring, evaluation and consultation. By the 3rd annual surveillance audit (around November 2021) demonstrate that this plan is being c…	Open	transparent
Alaska salmon	Certified	Alaska salmon	Default Tree v2.0 [Salmon]	3.2.2	Condition 9: Decision making	Chinook(=Spring=King) salmon- Yukon River	Salmons, trouts, smelts	Seine Nets	Yukon River	While ADFG decision-making processes are generally responsive to serious issues identified through research, monitoring, evaluation and consultation, it is not clear that they do so for all Ã¢â‚¬Å“serious and other important issuesÃ¢â‚¬Â as required by SG80 scoring issue B. New information presented by stakeholders regarding specific important issues (e.g. straying of chum salmon into West Crawf…	AFDF ACTION: AFDF will work with ADFG and NSRAA to document evidence of actions taken in response to new and unexpected information related to LCI and WCI hatchery strays. Additionally, AFDF will report on ADFGÃ¢â‚¬â„¢s progress towards implementation of the proposal presented at the March 7th, 2020 BOF Hatchery Committee Meeting, which outlined a third-party convening of a working group of agenc…	By the 2nd annual surveillance (around November 2020) demonstrate that a plan is in place to ensure the management system can respond to serious and other important issues and uses the precautionary approach in decision-making as issues arise through research, monitoring, evaluation and consultation. By the 3rd annual surveillance audit (around November 2021) demonstrate that this plan is being c…	Open	transparent
Alaska salmon	Certified	Alaska salmon	Default Tree v2.0 [Salmon]	3.2.2	Condition 9: Decision making	Chinook(=Spring=King) salmon- Yukon River	Salmons, trouts, smelts	Gillnets And Entangling Nets - Driftnets	Yukon River	While ADFG decision-making processes are generally responsive to serious issues identified through research, monitoring, evaluation and consultation, it is not clear that they do so for all Ã¢â‚¬Å“serious and other important issuesÃ¢â‚¬Â as required by SG80 scoring issue B. New information presented by stakeholders regarding specific important issues (e.g. straying of chum salmon into West Crawf…	AFDF ACTION: AFDF will work with ADFG and NSRAA to document evidence of actions taken in response to new and unexpected information related to LCI and WCI hatchery strays. Additionally, AFDF will report on ADFGÃ¢â‚¬â„¢s progress towards implementation of the proposal presented at the March 7th, 2020 BOF Hatchery Committee Meeting, which outlined a third-party convening of a working group of agenc…	By the 2nd annual surveillance (around November 2020) demonstrate that a plan is in place to ensure the management system can respond to serious and other important issues and uses the precautionary approach in decision-making as issues arise through research, monitoring, evaluation and consultation. By the 3rd annual surveillance audit (around November 2021) demonstrate that this plan is being c…	Open	transparent
Alaska salmon	Certified	Alaska salmon	Default Tree v2.0 [Salmon]	3.2.2	Condition 9: Decision making	Chinook(=Spring=King) salmon- Yukon River	Salmons, trouts, smelts	Gillnets And Entangling Nets - Gillnets	Yukon River	While ADFG decision-making processes are generally responsive to serious issues identified through research, monitoring, evaluation and consultation, it is not clear that they do so for all Ã¢â‚¬Å“serious and other important issuesÃ¢â‚¬Â as required by SG80 scoring issue B. New information presented by stakeholders regarding specific important issues (e.g. straying of chum salmon into West Crawf…	AFDF ACTION: AFDF will work with ADFG and NSRAA to document evidence of actions taken in response to new and unexpected information related to LCI and WCI hatchery strays. Additionally, AFDF will report on ADFGÃ¢â‚¬â„¢s progress towards implementation of the proposal presented at the March 7th, 2020 BOF Hatchery Committee Meeting, which outlined a third-party convening of a working group of agenc…	By the 2nd annual surveillance (around November 2020) demonstrate that a plan is in place to ensure the management system can respond to serious and other important issues and uses the precautionary approach in decision-making as issues arise through research, monitoring, evaluation and consultation. By the 3rd annual surveillance audit (around November 2021) demonstrate that this plan is being c…	Open	transparent
Alaska salmon	Certified	Alaska salmon	Default Tree v2.0 [Salmon]	3.2.2	Condition 9: Decision making	Chinook(=Spring=King) salmon- Yukon River	Salmons, trouts, smelts	Traps - Barriers, fences, weirs, etc.	Yukon River	While ADFG decision-making processes are generally responsive to serious issues identified through research, monitoring, evaluation and consultation, it is not clear that they do so for all Ã¢â‚¬Å“serious and other important issuesÃ¢â‚¬Â as required by SG80 scoring issue B. New information presented by stakeholders regarding specific important issues (e.g. straying of chum salmon into West Crawf…	AFDF ACTION: AFDF will work with ADFG and NSRAA to document evidence of actions taken in response to new and unexpected information related to LCI and WCI hatchery strays. Additionally, AFDF will report on ADFGÃ¢â‚¬â„¢s progress towards implementation of the proposal presented at the March 7th, 2020 BOF Hatchery Committee Meeting, which outlined a third-party convening of a working group of agenc…	By the 2nd annual surveillance (around November 2020) demonstrate that a plan is in place to ensure the management system can respond to serious and other important issues and uses the precautionary approach in decision-making as issues arise through research, monitoring, evaluation and consultation. By the 3rd annual surveillance audit (around November 2021) demonstrate that this plan is being c…	Open	transparent
Alaska salmon	Certified	Alaska salmon	Default Tree v2.0 [Salmon]	3.2.2	Condition 9: Decision making	Chinook(=Spring=King) salmon- Kuskokwim	Salmons, trouts, smelts	Gillnets And Entangling Nets - Driftnets	Kuskokwim	While ADFG decision-making processes are generally responsive to serious issues identified through research, monitoring, evaluation and consultation, it is not clear that they do so for all Ã¢â‚¬Å“serious and other important issuesÃ¢â‚¬Â as required by SG80 scoring issue B. New information presented by stakeholders regarding specific important issues (e.g. straying of chum salmon into West Crawf…	AFDF ACTION: AFDF will work with ADFG and NSRAA to document evidence of actions taken in response to new and unexpected information related to LCI and WCI hatchery strays. Additionally, AFDF will report on ADFGÃ¢â‚¬â„¢s progress towards implementation of the proposal presented at the March 7th, 2020 BOF Hatchery Committee Meeting, which outlined a third-party convening of a working group of agenc…	By the 2nd annual surveillance (around November 2020) demonstrate that a plan is in place to ensure the management system can respond to serious and other important issues and uses the precautionary approach in decision-making as issues arise through research, monitoring, evaluation and consultation. By the 3rd annual surveillance audit (around November 2021) demonstrate that this plan is being c…	Open	transparent
Alaska salmon	Certified	Alaska salmon	Default Tree v2.0 [Salmon]	3.2.2	Condition 9: Decision making	Chinook(=Spring=King) salmon- Kuskokwim	Salmons, trouts, smelts	Gillnets And Entangling Nets - Gillnets	Kuskokwim	While ADFG decision-making processes are generally responsive to serious issues identified through research, monitoring, evaluation and consultation, it is not clear that they do so for all Ã¢â‚¬Å“serious and other important issuesÃ¢â‚¬Â as required by SG80 scoring issue B. New information presented by stakeholders regarding specific important issues (e.g. straying of chum salmon into West Crawf…	AFDF ACTION: AFDF will work with ADFG and NSRAA to document evidence of actions taken in response to new and unexpected information related to LCI and WCI hatchery strays. Additionally, AFDF will report on ADFGÃ¢â‚¬â„¢s progress towards implementation of the proposal presented at the March 7th, 2020 BOF Hatchery Committee Meeting, which outlined a third-party convening of a working group of agenc…	By the 2nd annual surveillance (around November 2020) demonstrate that a plan is in place to ensure the management system can respond to serious and other important issues and uses the precautionary approach in decision-making as issues arise through research, monitoring, evaluation and consultation. By the 3rd annual surveillance audit (around November 2021) demonstrate that this plan is being c…	Open	transparent
Alaska salmon	Certified	Alaska salmon	Default Tree v2.0 [Salmon]	3.2.2	Condition 9: Decision making	Chinook(=Spring=King) salmon- Kodiak	Salmons, trouts, smelts	Gillnets And Entangling Nets - Gillnets	Kodiak	While ADFG decision-making processes are generally responsive to serious issues identified through research, monitoring, evaluation and consultation, it is not clear that they do so for all Ã¢â‚¬Å“serious and other important issuesÃ¢â‚¬Â as required by SG80 scoring issue B. New information presented by stakeholders regarding specific important issues (e.g. straying of chum salmon into West Crawf…	AFDF ACTION: AFDF will work with ADFG and NSRAA to document evidence of actions taken in response to new and unexpected information related to LCI and WCI hatchery strays. Additionally, AFDF will report on ADFGÃ¢â‚¬â„¢s progress towards implementation of the proposal presented at the March 7th, 2020 BOF Hatchery Committee Meeting, which outlined a third-party convening of a working group of agenc…	By the 2nd annual surveillance (around November 2020) demonstrate that a plan is in place to ensure the management system can respond to serious and other important issues and uses the precautionary approach in decision-making as issues arise through research, monitoring, evaluation and consultation. By the 3rd annual surveillance audit (around November 2021) demonstrate that this plan is being c…	Open	transparent
Alaska salmon	Certified	Alaska salmon	Default Tree v2.0 [Salmon]	3.2.2	Condition 9: Decision making	Chinook(=Spring=King) salmon- Kodiak	Salmons, trouts, smelts	Surrounding Nets - With purse lines (purse seines)	Kodiak	While ADFG decision-making processes are generally responsive to serious issues identified through research, monitoring, evaluation and consultation, it is not clear that they do so for all Ã¢â‚¬Å“serious and other important issuesÃ¢â‚¬Â as required by SG80 scoring issue B. New information presented by stakeholders regarding specific important issues (e.g. straying of chum salmon into West Crawf…	AFDF ACTION: AFDF will work with ADFG and NSRAA to document evidence of actions taken in response to new and unexpected information related to LCI and WCI hatchery strays. Additionally, AFDF will report on ADFGÃ¢â‚¬â„¢s progress towards implementation of the proposal presented at the March 7th, 2020 BOF Hatchery Committee Meeting, which outlined a third-party convening of a working group of agenc…	By the 2nd annual surveillance (around November 2020) demonstrate that a plan is in place to ensure the management system can respond to serious and other important issues and uses the precautionary approach in decision-making as issues arise through research, monitoring, evaluation and consultation. By the 3rd annual surveillance audit (around November 2021) demonstrate that this plan is being c…	Open	transparent
Alaska salmon	Certified	Alaska salmon	Default Tree v2.0 [Salmon]	3.2.2	Condition 9: Decision making	Chinook(=Spring=King) salmon- Kodiak	Salmons, trouts, smelts	Seine Nets	Kodiak	While ADFG decision-making processes are generally responsive to serious issues identified through research, monitoring, evaluation and consultation, it is not clear that they do so for all Ã¢â‚¬Å“serious and other important issuesÃ¢â‚¬Â as required by SG80 scoring issue B. New information presented by stakeholders regarding specific important issues (e.g. straying of chum salmon into West Crawf…	AFDF ACTION: AFDF will work with ADFG and NSRAA to document evidence of actions taken in response to new and unexpected information related to LCI and WCI hatchery strays. Additionally, AFDF will report on ADFGÃ¢â‚¬â„¢s progress towards implementation of the proposal presented at the March 7th, 2020 BOF Hatchery Committee Meeting, which outlined a third-party convening of a working group of agenc…	By the 2nd annual surveillance (around November 2020) demonstrate that a plan is in place to ensure the management system can respond to serious and other important issues and uses the precautionary approach in decision-making as issues arise through research, monitoring, evaluation and consultation. By the 3rd annual surveillance audit (around November 2021) demonstrate that this plan is being c…	Open	transparent
Alaska salmon	Certified	Alaska salmon	Default Tree v2.0 [Salmon]	3.2.2	Condition 9: Decision making	Chinook(=Spring=King) salmon- Chignik	Salmons, trouts, smelts	Surrounding Nets - With purse lines (purse seines)	Chignik	While ADFG decision-making processes are generally responsive to serious issues identified through research, monitoring, evaluation and consultation, it is not clear that they do so for all Ã¢â‚¬Å“serious and other important issuesÃ¢â‚¬Â as required by SG80 scoring issue B. New information presented by stakeholders regarding specific important issues (e.g. straying of chum salmon into West Crawf…	AFDF ACTION: AFDF will work with ADFG and NSRAA to document evidence of actions taken in response to new and unexpected information related to LCI and WCI hatchery strays. Additionally, AFDF will report on ADFGÃ¢â‚¬â„¢s progress towards implementation of the proposal presented at the March 7th, 2020 BOF Hatchery Committee Meeting, which outlined a third-party convening of a working group of agenc…	By the 2nd annual surveillance (around November 2020) demonstrate that a plan is in place to ensure the management system can respond to serious and other important issues and uses the precautionary approach in decision-making as issues arise through research, monitoring, evaluation and consultation. By the 3rd annual surveillance audit (around November 2021) demonstrate that this plan is being c…	Open	transparent
Alaska salmon	Certified	Alaska salmon	Default Tree v2.0 [Salmon]	3.2.2	Condition 9: Decision making	Chinook(=Spring=King) salmon- Peninsula/Aleutian Is.	Salmons, trouts, smelts	Surrounding Nets - With purse lines (purse seines)	Peninsula	While ADFG decision-making processes are generally responsive to serious issues identified through research, monitoring, evaluation and consultation, it is not clear that they do so for all Ã¢â‚¬Å“serious and other important issuesÃ¢â‚¬Â as required by SG80 scoring issue B. New information presented by stakeholders regarding specific important issues (e.g. straying of chum salmon into West Crawf…	AFDF ACTION: AFDF will work with ADFG and NSRAA to document evidence of actions taken in response to new and unexpected information related to LCI and WCI hatchery strays. Additionally, AFDF will report on ADFGÃ¢â‚¬â„¢s progress towards implementation of the proposal presented at the March 7th, 2020 BOF Hatchery Committee Meeting, which outlined a third-party convening of a working group of agenc…	By the 2nd annual surveillance (around November 2020) demonstrate that a plan is in place to ensure the management system can respond to serious and other important issues and uses the precautionary approach in decision-making as issues arise through research, monitoring, evaluation and consultation. By the 3rd annual surveillance audit (around November 2021) demonstrate that this plan is being c…	Open	transparent
Alaska salmon	Certified	Alaska salmon	Default Tree v2.0 [Salmon]	3.2.2	Condition 9: Decision making	Chinook(=Spring=King) salmon- Peninsula/Aleutian Is.	Salmons, trouts, smelts	Seine Nets	Peninsula	While ADFG decision-making processes are generally responsive to serious issues identified through research, monitoring, evaluation and consultation, it is not clear that they do so for all Ã¢â‚¬Å“serious and other important issuesÃ¢â‚¬Â as required by SG80 scoring issue B. New information presented by stakeholders regarding specific important issues (e.g. straying of chum salmon into West Crawf…	AFDF ACTION: AFDF will work with ADFG and NSRAA to document evidence of actions taken in response to new and unexpected information related to LCI and WCI hatchery strays. Additionally, AFDF will report on ADFGÃ¢â‚¬â„¢s progress towards implementation of the proposal presented at the March 7th, 2020 BOF Hatchery Committee Meeting, which outlined a third-party convening of a working group of agenc…	By the 2nd annual surveillance (around November 2020) demonstrate that a plan is in place to ensure the management system can respond to serious and other important issues and uses the precautionary approach in decision-making as issues arise through research, monitoring, evaluation and consultation. By the 3rd annual surveillance audit (around November 2021) demonstrate that this plan is being c…	Open	transparent
Alaska salmon	Certified	Alaska salmon	Default Tree v2.0 [Salmon]	3.2.2	Condition 9: Decision making	Chinook(=Spring=King) salmon- Peninsula/Aleutian Is.	Salmons, trouts, smelts	Gillnets And Entangling Nets - Driftnets	Peninsula	While ADFG decision-making processes are generally responsive to serious issues identified through research, monitoring, evaluation and consultation, it is not clear that they do so for all Ã¢â‚¬Å“serious and other important issuesÃ¢â‚¬Â as required by SG80 scoring issue B. New information presented by stakeholders regarding specific important issues (e.g. straying of chum salmon into West Crawf…	AFDF ACTION: AFDF will work with ADFG and NSRAA to document evidence of actions taken in response to new and unexpected information related to LCI and WCI hatchery strays. Additionally, AFDF will report on ADFGÃ¢â‚¬â„¢s progress towards implementation of the proposal presented at the March 7th, 2020 BOF Hatchery Committee Meeting, which outlined a third-party convening of a working group of agenc…	By the 2nd annual surveillance (around November 2020) demonstrate that a plan is in place to ensure the management system can respond to serious and other important issues and uses the precautionary approach in decision-making as issues arise through research, monitoring, evaluation and consultation. By the 3rd annual surveillance audit (around November 2021) demonstrate that this plan is being c…	Open	transparent
Alaska salmon	Certified	Alaska salmon	Default Tree v2.0 [Salmon]	3.2.2	Condition 9: Decision making	Chinook(=Spring=King) salmon- Peninsula/Aleutian Is.	Salmons, trouts, smelts	Gillnets And Entangling Nets - Gillnets	Peninsula	While ADFG decision-making processes are generally responsive to serious issues identified through research, monitoring, evaluation and consultation, it is not clear that they do so for all Ã¢â‚¬Å“serious and other important issuesÃ¢â‚¬Â as required by SG80 scoring issue B. New information presented by stakeholders regarding specific important issues (e.g. straying of chum salmon into West Crawf…	AFDF ACTION: AFDF will work with ADFG and NSRAA to document evidence of actions taken in response to new and unexpected information related to LCI and WCI hatchery strays. Additionally, AFDF will report on ADFGÃ¢â‚¬â„¢s progress towards implementation of the proposal presented at the March 7th, 2020 BOF Hatchery Committee Meeting, which outlined a third-party convening of a working group of agenc…	By the 2nd annual surveillance (around November 2020) demonstrate that a plan is in place to ensure the management system can respond to serious and other important issues and uses the precautionary approach in decision-making as issues arise through research, monitoring, evaluation and consultation. By the 3rd annual surveillance audit (around November 2021) demonstrate that this plan is being c…	Open	transparent
Alaska salmon	Certified	Alaska salmon	Default Tree v2.0 [Salmon]	3.2.2	Condition 9: Decision making	Coho(=Silver) salmon- Yakutat	Salmons, trouts, smelts	Hooks And Lines - Trolling lines	Yakutat	While ADFG decision-making processes are generally responsive to serious issues identified through research, monitoring, evaluation and consultation, it is not clear that they do so for all Ã¢â‚¬Å“serious and other important issuesÃ¢â‚¬Â as required by SG80 scoring issue B. New information presented by stakeholders regarding specific important issues (e.g. straying of chum salmon into West Crawf…	AFDF ACTION: AFDF will work with ADFG and NSRAA to document evidence of actions taken in response to new and unexpected information related to LCI and WCI hatchery strays. Additionally, AFDF will report on ADFGÃ¢â‚¬â„¢s progress towards implementation of the proposal presented at the March 7th, 2020 BOF Hatchery Committee Meeting, which outlined a third-party convening of a working group of agenc…	By the 2nd annual surveillance (around November 2020) demonstrate that a plan is in place to ensure the management system can respond to serious and other important issues and uses the precautionary approach in decision-making as issues arise through research, monitoring, evaluation and consultation. By the 3rd annual surveillance audit (around November 2021) demonstrate that this plan is being c…	Open	transparent
Alaska salmon	Certified	Alaska salmon	Default Tree v2.0 [Salmon]	3.2.2	Condition 9: Decision making	Coho(=Silver) salmon- Yakutat	Salmons, trouts, smelts	Gillnets And Entangling Nets - Gillnets	Yakutat	While ADFG decision-making processes are generally responsive to serious issues identified through research, monitoring, evaluation and consultation, it is not clear that they do so for all Ã¢â‚¬Å“serious and other important issuesÃ¢â‚¬Â as required by SG80 scoring issue B. New information presented by stakeholders regarding specific important issues (e.g. straying of chum salmon into West Crawf…	AFDF ACTION: AFDF will work with ADFG and NSRAA to document evidence of actions taken in response to new and unexpected information related to LCI and WCI hatchery strays. Additionally, AFDF will report on ADFGÃ¢â‚¬â„¢s progress towards implementation of the proposal presented at the March 7th, 2020 BOF Hatchery Committee Meeting, which outlined a third-party convening of a working group of agenc…	By the 2nd annual surveillance (around November 2020) demonstrate that a plan is in place to ensure the management system can respond to serious and other important issues and uses the precautionary approach in decision-making as issues arise through research, monitoring, evaluation and consultation. By the 3rd annual surveillance audit (around November 2021) demonstrate that this plan is being c…	Open	transparent
Alaska salmon	Certified	Alaska salmon	Default Tree v2.0 [Salmon]	3.2.2	Condition 9: Decision making	Coho(=Silver) salmon- Copper/Bering Districts	Salmons, trouts, smelts	Gillnets And Entangling Nets - Driftnets	Copper/Bering District	While ADFG decision-making processes are generally responsive to serious issues identified through research, monitoring, evaluation and consultation, it is not clear that they do so for all Ã¢â‚¬Å“serious and other important issuesÃ¢â‚¬Â as required by SG80 scoring issue B. New information presented by stakeholders regarding specific important issues (e.g. straying of chum salmon into West Crawf…	AFDF ACTION: AFDF will work with ADFG and NSRAA to document evidence of actions taken in response to new and unexpected information related to LCI and WCI hatchery strays. Additionally, AFDF will report on ADFGÃ¢â‚¬â„¢s progress towards implementation of the proposal presented at the March 7th, 2020 BOF Hatchery Committee Meeting, which outlined a third-party convening of a working group of agenc…	By the 2nd annual surveillance (around November 2020) demonstrate that a plan is in place to ensure the management system can respond to serious and other important issues and uses the precautionary approach in decision-making as issues arise through research, monitoring, evaluation and consultation. By the 3rd annual surveillance audit (around November 2021) demonstrate that this plan is being c…	Open	transparent
Alaska salmon	Certified	Alaska salmon	Default Tree v2.0 [Salmon]	3.2.2	Condition 9: Decision making	Coho(=Silver) salmon- Upper Cook Inlet	Salmons, trouts, smelts	Gillnets And Entangling Nets - Driftnets	Upper Cook Inlet	While ADFG decision-making processes are generally responsive to serious issues identified through research, monitoring, evaluation and consultation, it is not clear that they do so for all Ã¢â‚¬Å“serious and other important issuesÃ¢â‚¬Â as required by SG80 scoring issue B. New information presented by stakeholders regarding specific important issues (e.g. straying of chum salmon into West Crawf…	AFDF ACTION: AFDF will work with ADFG and NSRAA to document evidence of actions taken in response to new and unexpected information related to LCI and WCI hatchery strays. Additionally, AFDF will report on ADFGÃ¢â‚¬â„¢s progress towards implementation of the proposal presented at the March 7th, 2020 BOF Hatchery Committee Meeting, which outlined a third-party convening of a working group of agenc…	By the 2nd annual surveillance (around November 2020) demonstrate that a plan is in place to ensure the management system can respond to serious and other important issues and uses the precautionary approach in decision-making as issues arise through research, monitoring, evaluation and consultation. By the 3rd annual surveillance audit (around November 2021) demonstrate that this plan is being c…	Open	transparent
Alaska salmon	Certified	Alaska salmon	Default Tree v2.0 [Salmon]	3.2.2	Condition 9: Decision making	Coho(=Silver) salmon- Bristol Bay	Salmons, trouts, smelts	Gillnets And Entangling Nets - Driftnets	Bristol Bay	While ADFG decision-making processes are generally responsive to serious issues identified through research, monitoring, evaluation and consultation, it is not clear that they do so for all Ã¢â‚¬Å“serious and other important issuesÃ¢â‚¬Â as required by SG80 scoring issue B. New information presented by stakeholders regarding specific important issues (e.g. straying of chum salmon into West Crawf…	AFDF ACTION: AFDF will work with ADFG and NSRAA to document evidence of actions taken in response to new and unexpected information related to LCI and WCI hatchery strays. Additionally, AFDF will report on ADFGÃ¢â‚¬â„¢s progress towards implementation of the proposal presented at the March 7th, 2020 BOF Hatchery Committee Meeting, which outlined a third-party convening of a working group of agenc…	By the 2nd annual surveillance (around November 2020) demonstrate that a plan is in place to ensure the management system can respond to serious and other important issues and uses the precautionary approach in decision-making as issues arise through research, monitoring, evaluation and consultation. By the 3rd annual surveillance audit (around November 2021) demonstrate that this plan is being c…	Open	transparent
Alaska salmon	Certified	Alaska salmon	Default Tree v2.0 [Salmon]	3.2.2	Condition 9: Decision making	Coho(=Silver) salmon- Bristol Bay	Salmons, trouts, smelts	Gillnets And Entangling Nets - Gillnets	Bristol Bay	While ADFG decision-making processes are generally responsive to serious issues identified through research, monitoring, evaluation and consultation, it is not clear that they do so for all Ã¢â‚¬Å“serious and other important issuesÃ¢â‚¬Â as required by SG80 scoring issue B. New information presented by stakeholders regarding specific important issues (e.g. straying of chum salmon into West Crawf…	AFDF ACTION: AFDF will work with ADFG and NSRAA to document evidence of actions taken in response to new and unexpected information related to LCI and WCI hatchery strays. Additionally, AFDF will report on ADFGÃ¢â‚¬â„¢s progress towards implementation of the proposal presented at the March 7th, 2020 BOF Hatchery Committee Meeting, which outlined a third-party convening of a working group of agenc…	By the 2nd annual surveillance (around November 2020) demonstrate that a plan is in place to ensure the management system can respond to serious and other important issues and uses the precautionary approach in decision-making as issues arise through research, monitoring, evaluation and consultation. By the 3rd annual surveillance audit (around November 2021) demonstrate that this plan is being c…	Open	transparent
Alaska salmon	Certified	Alaska salmon	Default Tree v2.0 [Salmon]	3.2.2	Condition 9: Decision making	Coho(=Silver) salmon- Yukon River	Salmons, trouts, smelts	Traps - Barriers, fences, weirs, etc.	Yukon River	While ADFG decision-making processes are generally responsive to serious issues identified through research, monitoring, evaluation and consultation, it is not clear that they do so for all Ã¢â‚¬Å“serious and other important issuesÃ¢â‚¬Â as required by SG80 scoring issue B. New information presented by stakeholders regarding specific important issues (e.g. straying of chum salmon into West Crawf…	AFDF ACTION: AFDF will work with ADFG and NSRAA to document evidence of actions taken in response to new and unexpected information related to LCI and WCI hatchery strays. Additionally, AFDF will report on ADFGÃ¢â‚¬â„¢s progress towards implementation of the proposal presented at the March 7th, 2020 BOF Hatchery Committee Meeting, which outlined a third-party convening of a working group of agenc…	By the 2nd annual surveillance (around November 2020) demonstrate that a plan is in place to ensure the management system can respond to serious and other important issues and uses the precautionary approach in decision-making as issues arise through research, monitoring, evaluation and consultation. By the 3rd annual surveillance audit (around November 2021) demonstrate that this plan is being c…	Open	transparent
Alaska salmon	Certified	Alaska salmon	Default Tree v2.0 [Salmon]	3.2.2	Condition 9: Decision making	Coho(=Silver) salmon- Yukon River	Salmons, trouts, smelts	Seine Nets	Yukon River	While ADFG decision-making processes are generally responsive to serious issues identified through research, monitoring, evaluation and consultation, it is not clear that they do so for all Ã¢â‚¬Å“serious and other important issuesÃ¢â‚¬Â as required by SG80 scoring issue B. New information presented by stakeholders regarding specific important issues (e.g. straying of chum salmon into West Crawf…	AFDF ACTION: AFDF will work with ADFG and NSRAA to document evidence of actions taken in response to new and unexpected information related to LCI and WCI hatchery strays. Additionally, AFDF will report on ADFGÃ¢â‚¬â„¢s progress towards implementation of the proposal presented at the March 7th, 2020 BOF Hatchery Committee Meeting, which outlined a third-party convening of a working group of agenc…	By the 2nd annual surveillance (around November 2020) demonstrate that a plan is in place to ensure the management system can respond to serious and other important issues and uses the precautionary approach in decision-making as issues arise through research, monitoring, evaluation and consultation. By the 3rd annual surveillance audit (around November 2021) demonstrate that this plan is being c…	Open	transparent
Alaska salmon	Certified	Alaska salmon	Default Tree v2.0 [Salmon]	3.2.2	Condition 9: Decision making	Coho(=Silver) salmon- Yukon River	Salmons, trouts, smelts	Gillnets And Entangling Nets - Driftnets	Yukon River	While ADFG decision-making processes are generally responsive to serious issues identified through research, monitoring, evaluation and consultation, it is not clear that they do so for all Ã¢â‚¬Å“serious and other important issuesÃ¢â‚¬Â as required by SG80 scoring issue B. New information presented by stakeholders regarding specific important issues (e.g. straying of chum salmon into West Crawf…	AFDF ACTION: AFDF will work with ADFG and NSRAA to document evidence of actions taken in response to new and unexpected information related to LCI and WCI hatchery strays. Additionally, AFDF will report on ADFGÃ¢â‚¬â„¢s progress towards implementation of the proposal presented at the March 7th, 2020 BOF Hatchery Committee Meeting, which outlined a third-party convening of a working group of agenc…	By the 2nd annual surveillance (around November 2020) demonstrate that a plan is in place to ensure the management system can respond to serious and other important issues and uses the precautionary approach in decision-making as issues arise through research, monitoring, evaluation and consultation. By the 3rd annual surveillance audit (around November 2021) demonstrate that this plan is being c…	Open	transparent
Alaska salmon	Certified	Alaska salmon	Default Tree v2.0 [Salmon]	3.2.2	Condition 9: Decision making	Coho(=Silver) salmon- Yukon River	Salmons, trouts, smelts	Gillnets And Entangling Nets - Gillnets	Yukon River	While ADFG decision-making processes are generally responsive to serious issues identified through research, monitoring, evaluation and consultation, it is not clear that they do so for all Ã¢â‚¬Å“serious and other important issuesÃ¢â‚¬Â as required by SG80 scoring issue B. New information presented by stakeholders regarding specific important issues (e.g. straying of chum salmon into West Crawf…	AFDF ACTION: AFDF will work with ADFG and NSRAA to document evidence of actions taken in response to new and unexpected information related to LCI and WCI hatchery strays. Additionally, AFDF will report on ADFGÃ¢â‚¬â„¢s progress towards implementation of the proposal presented at the March 7th, 2020 BOF Hatchery Committee Meeting, which outlined a third-party convening of a working group of agenc…	By the 2nd annual surveillance (around November 2020) demonstrate that a plan is in place to ensure the management system can respond to serious and other important issues and uses the precautionary approach in decision-making as issues arise through research, monitoring, evaluation and consultation. By the 3rd annual surveillance audit (around November 2021) demonstrate that this plan is being c…	Open	transparent
Alaska salmon	Certified	Alaska salmon	Default Tree v2.0 [Salmon]	3.2.2	Condition 9: Decision making	Coho(=Silver) salmon- Kuskokwim	Salmons, trouts, smelts	Gillnets And Entangling Nets - Driftnets	Kuskokwim	While ADFG decision-making processes are generally responsive to serious issues identified through research, monitoring, evaluation and consultation, it is not clear that they do so for all Ã¢â‚¬Å“serious and other important issuesÃ¢â‚¬Â as required by SG80 scoring issue B. New information presented by stakeholders regarding specific important issues (e.g. straying of chum salmon into West Crawf…	AFDF ACTION: AFDF will work with ADFG and NSRAA to document evidence of actions taken in response to new and unexpected information related to LCI and WCI hatchery strays. Additionally, AFDF will report on ADFGÃ¢â‚¬â„¢s progress towards implementation of the proposal presented at the March 7th, 2020 BOF Hatchery Committee Meeting, which outlined a third-party convening of a working group of agenc…	By the 2nd annual surveillance (around November 2020) demonstrate that a plan is in place to ensure the management system can respond to serious and other important issues and uses the precautionary approach in decision-making as issues arise through research, monitoring, evaluation and consultation. By the 3rd annual surveillance audit (around November 2021) demonstrate that this plan is being c…	Open	transparent
Alaska salmon	Certified	Alaska salmon	Default Tree v2.0 [Salmon]	3.2.2	Condition 9: Decision making	Coho(=Silver) salmon- Kuskokwim	Salmons, trouts, smelts	Gillnets And Entangling Nets - Gillnets	Kuskokwim	While ADFG decision-making processes are generally responsive to serious issues identified through research, monitoring, evaluation and consultation, it is not clear that they do so for all Ã¢â‚¬Å“serious and other important issuesÃ¢â‚¬Â as required by SG80 scoring issue B. New information presented by stakeholders regarding specific important issues (e.g. straying of chum salmon into West Crawf…	AFDF ACTION: AFDF will work with ADFG and NSRAA to document evidence of actions taken in response to new and unexpected information related to LCI and WCI hatchery strays. Additionally, AFDF will report on ADFGÃ¢â‚¬â„¢s progress towards implementation of the proposal presented at the March 7th, 2020 BOF Hatchery Committee Meeting, which outlined a third-party convening of a working group of agenc…	By the 2nd annual surveillance (around November 2020) demonstrate that a plan is in place to ensure the management system can respond to serious and other important issues and uses the precautionary approach in decision-making as issues arise through research, monitoring, evaluation and consultation. By the 3rd annual surveillance audit (around November 2021) demonstrate that this plan is being c…	Open	transparent
Alaska salmon	Certified	Alaska salmon	Default Tree v2.0 [Salmon]	3.2.2	Condition 9: Decision making	Coho(=Silver) salmon- Norton Sound	Salmons, trouts, smelts	Gillnets And Entangling Nets - Gillnets	Norton Sound	While ADFG decision-making processes are generally responsive to serious issues identified through research, monitoring, evaluation and consultation, it is not clear that they do so for all Ã¢â‚¬Å“serious and other important issuesÃ¢â‚¬Â as required by SG80 scoring issue B. New information presented by stakeholders regarding specific important issues (e.g. straying of chum salmon into West Crawf…	AFDF ACTION: AFDF will work with ADFG and NSRAA to document evidence of actions taken in response to new and unexpected information related to LCI and WCI hatchery strays. Additionally, AFDF will report on ADFGÃ¢â‚¬â„¢s progress towards implementation of the proposal presented at the March 7th, 2020 BOF Hatchery Committee Meeting, which outlined a third-party convening of a working group of agenc…	By the 2nd annual surveillance (around November 2020) demonstrate that a plan is in place to ensure the management system can respond to serious and other important issues and uses the precautionary approach in decision-making as issues arise through research, monitoring, evaluation and consultation. By the 3rd annual surveillance audit (around November 2021) demonstrate that this plan is being c…	Open	transparent
Alaska salmon	Certified	Alaska salmon	Default Tree v2.0 [Salmon]	3.2.2	Condition 9: Decision making	Coho(=Silver) salmon- Kodiak	Salmons, trouts, smelts	Gillnets And Entangling Nets - Gillnets	Kodiak	While ADFG decision-making processes are generally responsive to serious issues identified through research, monitoring, evaluation and consultation, it is not clear that they do so for all Ã¢â‚¬Å“serious and other important issuesÃ¢â‚¬Â as required by SG80 scoring issue B. New information presented by stakeholders regarding specific important issues (e.g. straying of chum salmon into West Crawf…	AFDF ACTION: AFDF will work with ADFG and NSRAA to document evidence of actions taken in response to new and unexpected information related to LCI and WCI hatchery strays. Additionally, AFDF will report on ADFGÃ¢â‚¬â„¢s progress towards implementation of the proposal presented at the March 7th, 2020 BOF Hatchery Committee Meeting, which outlined a third-party convening of a working group of agenc…	By the 2nd annual surveillance (around November 2020) demonstrate that a plan is in place to ensure the management system can respond to serious and other important issues and uses the precautionary approach in decision-making as issues arise through research, monitoring, evaluation and consultation. By the 3rd annual surveillance audit (around November 2021) demonstrate that this plan is being c…	Open	transparent
Alaska salmon	Certified	Alaska salmon	Default Tree v2.0 [Salmon]	3.2.2	Condition 9: Decision making	Coho(=Silver) salmon- Kodiak	Salmons, trouts, smelts	Surrounding Nets - With purse lines (purse seines)	Kodiak	While ADFG decision-making processes are generally responsive to serious issues identified through research, monitoring, evaluation and consultation, it is not clear that they do so for all Ã¢â‚¬Å“serious and other important issuesÃ¢â‚¬Â as required by SG80 scoring issue B. New information presented by stakeholders regarding specific important issues (e.g. straying of chum salmon into West Crawf…	AFDF ACTION: AFDF will work with ADFG and NSRAA to document evidence of actions taken in response to new and unexpected information related to LCI and WCI hatchery strays. Additionally, AFDF will report on ADFGÃ¢â‚¬â„¢s progress towards implementation of the proposal presented at the March 7th, 2020 BOF Hatchery Committee Meeting, which outlined a third-party convening of a working group of agenc…	By the 2nd annual surveillance (around November 2020) demonstrate that a plan is in place to ensure the management system can respond to serious and other important issues and uses the precautionary approach in decision-making as issues arise through research, monitoring, evaluation and consultation. By the 3rd annual surveillance audit (around November 2021) demonstrate that this plan is being c…	Open	transparent
Alaska salmon	Certified	Alaska salmon	Default Tree v2.0 [Salmon]	3.2.2	Condition 9: Decision making	Coho(=Silver) salmon- Kodiak	Salmons, trouts, smelts	Seine Nets	Kodiak	While ADFG decision-making processes are generally responsive to serious issues identified through research, monitoring, evaluation and consultation, it is not clear that they do so for all Ã¢â‚¬Å“serious and other important issuesÃ¢â‚¬Â as required by SG80 scoring issue B. New information presented by stakeholders regarding specific important issues (e.g. straying of chum salmon into West Crawf…	AFDF ACTION: AFDF will work with ADFG and NSRAA to document evidence of actions taken in response to new and unexpected information related to LCI and WCI hatchery strays. Additionally, AFDF will report on ADFGÃ¢â‚¬â„¢s progress towards implementation of the proposal presented at the March 7th, 2020 BOF Hatchery Committee Meeting, which outlined a third-party convening of a working group of agenc…	By the 2nd annual surveillance (around November 2020) demonstrate that a plan is in place to ensure the management system can respond to serious and other important issues and uses the precautionary approach in decision-making as issues arise through research, monitoring, evaluation and consultation. By the 3rd annual surveillance audit (around November 2021) demonstrate that this plan is being c…	Open	transparent
Alaska salmon	Certified	Alaska salmon	Default Tree v2.0 [Salmon]	3.2.2	Condition 9: Decision making	Coho(=Silver) salmon- Peninsula/Aleutian Is.	Salmons, trouts, smelts	Surrounding Nets - With purse lines (purse seines)	Peninsula	While ADFG decision-making processes are generally responsive to serious issues identified through research, monitoring, evaluation and consultation, it is not clear that they do so for all Ã¢â‚¬Å“serious and other important issuesÃ¢â‚¬Â as required by SG80 scoring issue B. New information presented by stakeholders regarding specific important issues (e.g. straying of chum salmon into West Crawf…	AFDF ACTION: AFDF will work with ADFG and NSRAA to document evidence of actions taken in response to new and unexpected information related to LCI and WCI hatchery strays. Additionally, AFDF will report on ADFGÃ¢â‚¬â„¢s progress towards implementation of the proposal presented at the March 7th, 2020 BOF Hatchery Committee Meeting, which outlined a third-party convening of a working group of agenc…	By the 2nd annual surveillance (around November 2020) demonstrate that a plan is in place to ensure the management system can respond to serious and other important issues and uses the precautionary approach in decision-making as issues arise through research, monitoring, evaluation and consultation. By the 3rd annual surveillance audit (around November 2021) demonstrate that this plan is being c…	Open	transparent
Alaska salmon	Certified	Alaska salmon	Default Tree v2.0 [Salmon]	3.2.2	Condition 9: Decision making	Coho(=Silver) salmon- Peninsula/Aleutian Is.	Salmons, trouts, smelts	Seine Nets	Peninsula	While ADFG decision-making processes are generally responsive to serious issues identified through research, monitoring, evaluation and consultation, it is not clear that they do so for all Ã¢â‚¬Å“serious and other important issuesÃ¢â‚¬Â as required by SG80 scoring issue B. New information presented by stakeholders regarding specific important issues (e.g. straying of chum salmon into West Crawf…	AFDF ACTION: AFDF will work with ADFG and NSRAA to document evidence of actions taken in response to new and unexpected information related to LCI and WCI hatchery strays. Additionally, AFDF will report on ADFGÃ¢â‚¬â„¢s progress towards implementation of the proposal presented at the March 7th, 2020 BOF Hatchery Committee Meeting, which outlined a third-party convening of a working group of agenc…	By the 2nd annual surveillance (around November 2020) demonstrate that a plan is in place to ensure the management system can respond to serious and other important issues and uses the precautionary approach in decision-making as issues arise through research, monitoring, evaluation and consultation. By the 3rd annual surveillance audit (around November 2021) demonstrate that this plan is being c…	Open	transparent
Alaska salmon	Certified	Alaska salmon	Default Tree v2.0 [Salmon]	3.2.2	Condition 9: Decision making	Coho(=Silver) salmon- Peninsula/Aleutian Is.	Salmons, trouts, smelts	Gillnets And Entangling Nets - Driftnets	Peninsula	While ADFG decision-making processes are generally responsive to serious issues identified through research, monitoring, evaluation and consultation, it is not clear that they do so for all Ã¢â‚¬Å“serious and other important issuesÃ¢â‚¬Â as required by SG80 scoring issue B. New information presented by stakeholders regarding specific important issues (e.g. straying of chum salmon into West Crawf…	AFDF ACTION: AFDF will work with ADFG and NSRAA to document evidence of actions taken in response to new and unexpected information related to LCI and WCI hatchery strays. Additionally, AFDF will report on ADFGÃ¢â‚¬â„¢s progress towards implementation of the proposal presented at the March 7th, 2020 BOF Hatchery Committee Meeting, which outlined a third-party convening of a working group of agenc…	By the 2nd annual surveillance (around November 2020) demonstrate that a plan is in place to ensure the management system can respond to serious and other important issues and uses the precautionary approach in decision-making as issues arise through research, monitoring, evaluation and consultation. By the 3rd annual surveillance audit (around November 2021) demonstrate that this plan is being c…	Open	transparent
Alaska salmon	Certified	Alaska salmon	Default Tree v2.0 [Salmon]	3.2.2	Condition 9: Decision making	Coho(=Silver) salmon- Peninsula/Aleutian Is.	Salmons, trouts, smelts	Gillnets And Entangling Nets - Gillnets	Peninsula	While ADFG decision-making processes are generally responsive to serious issues identified through research, monitoring, evaluation and consultation, it is not clear that they do so for all Ã¢â‚¬Å“serious and other important issuesÃ¢â‚¬Â as required by SG80 scoring issue B. New information presented by stakeholders regarding specific important issues (e.g. straying of chum salmon into West Crawf…	AFDF ACTION: AFDF will work with ADFG and NSRAA to document evidence of actions taken in response to new and unexpected information related to LCI and WCI hatchery strays. Additionally, AFDF will report on ADFGÃ¢â‚¬â„¢s progress towards implementation of the proposal presented at the March 7th, 2020 BOF Hatchery Committee Meeting, which outlined a third-party convening of a working group of agenc…	By the 2nd annual surveillance (around November 2020) demonstrate that a plan is in place to ensure the management system can respond to serious and other important issues and uses the precautionary approach in decision-making as issues arise through research, monitoring, evaluation and consultation. By the 3rd annual surveillance audit (around November 2021) demonstrate that this plan is being c…	Open	transparent
Alaska salmon	Certified	Alaska salmon	Default Tree v2.0 [Salmon]	3.2.2	Condition 9: Decision making	Pink(=Humpback) salmon- Yakutat	Salmons, trouts, smelts	Gillnets And Entangling Nets - Gillnets	Yakutat	While ADFG decision-making processes are generally responsive to serious issues identified through research, monitoring, evaluation and consultation, it is not clear that they do so for all Ã¢â‚¬Å“serious and other important issuesÃ¢â‚¬Â as required by SG80 scoring issue B. New information presented by stakeholders regarding specific important issues (e.g. straying of chum salmon into West Crawf…	AFDF ACTION: AFDF will work with ADFG and NSRAA to document evidence of actions taken in response to new and unexpected information related to LCI and WCI hatchery strays. Additionally, AFDF will report on ADFGÃ¢â‚¬â„¢s progress towards implementation of the proposal presented at the March 7th, 2020 BOF Hatchery Committee Meeting, which outlined a third-party convening of a working group of agenc…	By the 2nd annual surveillance (around November 2020) demonstrate that a plan is in place to ensure the management system can respond to serious and other important issues and uses the precautionary approach in decision-making as issues arise through research, monitoring, evaluation and consultation. By the 3rd annual surveillance audit (around November 2021) demonstrate that this plan is being c…	Open	transparent
Alaska salmon	Certified	Alaska salmon	Default Tree v2.0 [Salmon]	3.2.2	Condition 9: Decision making	Pink(=Humpback) salmon- Yakutat	Salmons, trouts, smelts	Hooks And Lines - Trolling lines	Yakutat	While ADFG decision-making processes are generally responsive to serious issues identified through research, monitoring, evaluation and consultation, it is not clear that they do so for all Ã¢â‚¬Å“serious and other important issuesÃ¢â‚¬Â as required by SG80 scoring issue B. New information presented by stakeholders regarding specific important issues (e.g. straying of chum salmon into West Crawf…	AFDF ACTION: AFDF will work with ADFG and NSRAA to document evidence of actions taken in response to new and unexpected information related to LCI and WCI hatchery strays. Additionally, AFDF will report on ADFGÃ¢â‚¬â„¢s progress towards implementation of the proposal presented at the March 7th, 2020 BOF Hatchery Committee Meeting, which outlined a third-party convening of a working group of agenc…	By the 2nd annual surveillance (around November 2020) demonstrate that a plan is in place to ensure the management system can respond to serious and other important issues and uses the precautionary approach in decision-making as issues arise through research, monitoring, evaluation and consultation. By the 3rd annual surveillance audit (around November 2021) demonstrate that this plan is being c…	Open	transparent
Alaska salmon	Certified	Alaska salmon	Default Tree v2.0 [Salmon]	3.2.2	Condition 9: Decision making	Pink(=Humpback) salmon- Prince William Sound	Salmons, trouts, smelts	Seine Nets	Prince William Sound	While ADFG decision-making processes are generally responsive to serious issues identified through research, monitoring, evaluation and consultation, it is not clear that they do so for all Ã¢â‚¬Å“serious and other important issuesÃ¢â‚¬Â as required by SG80 scoring issue B. New information presented by stakeholders regarding specific important issues (e.g. straying of chum salmon into West Crawf…	AFDF ACTION: AFDF will work with ADFG and NSRAA to document evidence of actions taken in response to new and unexpected information related to LCI and WCI hatchery strays. Additionally, AFDF will report on ADFGÃ¢â‚¬â„¢s progress towards implementation of the proposal presented at the March 7th, 2020 BOF Hatchery Committee Meeting, which outlined a third-party convening of a working group of agenc…	By the 2nd annual surveillance (around November 2020) demonstrate that a plan is in place to ensure the management system can respond to serious and other important issues and uses the precautionary approach in decision-making as issues arise through research, monitoring, evaluation and consultation. By the 3rd annual surveillance audit (around November 2021) demonstrate that this plan is being c…	Open	transparent
Alaska salmon	Certified	Alaska salmon	Default Tree v2.0 [Salmon]	3.2.2	Condition 9: Decision making	Pink(=Humpback) salmon- Prince William Sound	Salmons, trouts, smelts	Gillnets And Entangling Nets - Driftnets	Prince William Sound	While ADFG decision-making processes are generally responsive to serious issues identified through research, monitoring, evaluation and consultation, it is not clear that they do so for all Ã¢â‚¬Å“serious and other important issuesÃ¢â‚¬Â as required by SG80 scoring issue B. New information presented by stakeholders regarding specific important issues (e.g. straying of chum salmon into West Crawf…	AFDF ACTION: AFDF will work with ADFG and NSRAA to document evidence of actions taken in response to new and unexpected information related to LCI and WCI hatchery strays. Additionally, AFDF will report on ADFGÃ¢â‚¬â„¢s progress towards implementation of the proposal presented at the March 7th, 2020 BOF Hatchery Committee Meeting, which outlined a third-party convening of a working group of agenc…	By the 2nd annual surveillance (around November 2020) demonstrate that a plan is in place to ensure the management system can respond to serious and other important issues and uses the precautionary approach in decision-making as issues arise through research, monitoring, evaluation and consultation. By the 3rd annual surveillance audit (around November 2021) demonstrate that this plan is being c…	Open	transparent
Alaska salmon	Certified	Alaska salmon	Default Tree v2.0 [Salmon]	3.2.2	Condition 9: Decision making	Pink(=Humpback) salmon- Prince William Sound	Salmons, trouts, smelts	Gillnets And Entangling Nets - Gillnets	Prince William Sound	While ADFG decision-making processes are generally responsive to serious issues identified through research, monitoring, evaluation and consultation, it is not clear that they do so for all Ã¢â‚¬Å“serious and other important issuesÃ¢â‚¬Â as required by SG80 scoring issue B. New information presented by stakeholders regarding specific important issues (e.g. straying of chum salmon into West Crawf…	AFDF ACTION: AFDF will work with ADFG and NSRAA to document evidence of actions taken in response to new and unexpected information related to LCI and WCI hatchery strays. Additionally, AFDF will report on ADFGÃ¢â‚¬â„¢s progress towards implementation of the proposal presented at the March 7th, 2020 BOF Hatchery Committee Meeting, which outlined a third-party convening of a working group of agenc…	By the 2nd annual surveillance (around November 2020) demonstrate that a plan is in place to ensure the management system can respond to serious and other important issues and uses the precautionary approach in decision-making as issues arise through research, monitoring, evaluation and consultation. By the 3rd annual surveillance audit (around November 2021) demonstrate that this plan is being c…	Open	transparent
Alaska salmon	Certified	Alaska salmon	Default Tree v2.0 [Salmon]	3.2.2	Condition 9: Decision making	Pink(=Humpback) salmon- Lower Cook Inlet	Salmons, trouts, smelts	Surrounding Nets - With purse lines (purse seines)	Lower Cook Inlet	While ADFG decision-making processes are generally responsive to serious issues identified through research, monitoring, evaluation and consultation, it is not clear that they do so for all Ã¢â‚¬Å“serious and other important issuesÃ¢â‚¬Â as required by SG80 scoring issue B. New information presented by stakeholders regarding specific important issues (e.g. straying of chum salmon into West Crawf…	AFDF ACTION: AFDF will work with ADFG and NSRAA to document evidence of actions taken in response to new and unexpected information related to LCI and WCI hatchery strays. Additionally, AFDF will report on ADFGÃ¢â‚¬â„¢s progress towards implementation of the proposal presented at the March 7th, 2020 BOF Hatchery Committee Meeting, which outlined a third-party convening of a working group of agenc…	By the 2nd annual surveillance (around November 2020) demonstrate that a plan is in place to ensure the management system can respond to serious and other important issues and uses the precautionary approach in decision-making as issues arise through research, monitoring, evaluation and consultation. By the 3rd annual surveillance audit (around November 2021) demonstrate that this plan is being c…	Open	transparent
Alaska salmon	Certified	Alaska salmon	Default Tree v2.0 [Salmon]	3.2.2	Condition 9: Decision making	Pink(=Humpback) salmon- Lower Cook Inlet	Salmons, trouts, smelts	Gillnets And Entangling Nets - Gillnets	Lower Cook Inlet	While ADFG decision-making processes are generally responsive to serious issues identified through research, monitoring, evaluation and consultation, it is not clear that they do so for all Ã¢â‚¬Å“serious and other important issuesÃ¢â‚¬Â as required by SG80 scoring issue B. New information presented by stakeholders regarding specific important issues (e.g. straying of chum salmon into West Crawf…	AFDF ACTION: AFDF will work with ADFG and NSRAA to document evidence of actions taken in response to new and unexpected information related to LCI and WCI hatchery strays. Additionally, AFDF will report on ADFGÃ¢â‚¬â„¢s progress towards implementation of the proposal presented at the March 7th, 2020 BOF Hatchery Committee Meeting, which outlined a third-party convening of a working group of agenc…	By the 2nd annual surveillance (around November 2020) demonstrate that a plan is in place to ensure the management system can respond to serious and other important issues and uses the precautionary approach in decision-making as issues arise through research, monitoring, evaluation and consultation. By the 3rd annual surveillance audit (around November 2021) demonstrate that this plan is being c…	Open	transparent
Alaska salmon	Certified	Alaska salmon	Default Tree v2.0 [Salmon]	3.2.2	Condition 9: Decision making	Pink(=Humpback) salmon- Upper Cook Inlet	Salmons, trouts, smelts	Gillnets And Entangling Nets - Driftnets	Upper Cook Inlet	While ADFG decision-making processes are generally responsive to serious issues identified through research, monitoring, evaluation and consultation, it is not clear that they do so for all Ã¢â‚¬Å“serious and other important issuesÃ¢â‚¬Â as required by SG80 scoring issue B. New information presented by stakeholders regarding specific important issues (e.g. straying of chum salmon into West Crawf…	AFDF ACTION: AFDF will work with ADFG and NSRAA to document evidence of actions taken in response to new and unexpected information related to LCI and WCI hatchery strays. Additionally, AFDF will report on ADFGÃ¢â‚¬â„¢s progress towards implementation of the proposal presented at the March 7th, 2020 BOF Hatchery Committee Meeting, which outlined a third-party convening of a working group of agenc…	By the 2nd annual surveillance (around November 2020) demonstrate that a plan is in place to ensure the management system can respond to serious and other important issues and uses the precautionary approach in decision-making as issues arise through research, monitoring, evaluation and consultation. By the 3rd annual surveillance audit (around November 2021) demonstrate that this plan is being c…	Open	transparent
Alaska salmon	Certified	Alaska salmon	Default Tree v2.0 [Salmon]	3.2.2	Condition 9: Decision making	Pink(=Humpback) salmon- Upper Cook Inlet	Salmons, trouts, smelts	Gillnets And Entangling Nets - Gillnets	Upper Cook Inlet	While ADFG decision-making processes are generally responsive to serious issues identified through research, monitoring, evaluation and consultation, it is not clear that they do so for all Ã¢â‚¬Å“serious and other important issuesÃ¢â‚¬Â as required by SG80 scoring issue B. New information presented by stakeholders regarding specific important issues (e.g. straying of chum salmon into West Crawf…	AFDF ACTION: AFDF will work with ADFG and NSRAA to document evidence of actions taken in response to new and unexpected information related to LCI and WCI hatchery strays. Additionally, AFDF will report on ADFGÃ¢â‚¬â„¢s progress towards implementation of the proposal presented at the March 7th, 2020 BOF Hatchery Committee Meeting, which outlined a third-party convening of a working group of agenc…	By the 2nd annual surveillance (around November 2020) demonstrate that a plan is in place to ensure the management system can respond to serious and other important issues and uses the precautionary approach in decision-making as issues arise through research, monitoring, evaluation and consultation. By the 3rd annual surveillance audit (around November 2021) demonstrate that this plan is being c…	Open	transparent
Alaska salmon	Certified	Alaska salmon	Default Tree v2.0 [Salmon]	3.2.2	Condition 9: Decision making	Pink(=Humpback) salmon- Bristol Bay	Salmons, trouts, smelts	Gillnets And Entangling Nets - Driftnets	Bristol Bay	While ADFG decision-making processes are generally responsive to serious issues identified through research, monitoring, evaluation and consultation, it is not clear that they do so for all Ã¢â‚¬Å“serious and other important issuesÃ¢â‚¬Â as required by SG80 scoring issue B. New information presented by stakeholders regarding specific important issues (e.g. straying of chum salmon into West Crawf…	AFDF ACTION: AFDF will work with ADFG and NSRAA to document evidence of actions taken in response to new and unexpected information related to LCI and WCI hatchery strays. Additionally, AFDF will report on ADFGÃ¢â‚¬â„¢s progress towards implementation of the proposal presented at the March 7th, 2020 BOF Hatchery Committee Meeting, which outlined a third-party convening of a working group of agenc…	By the 2nd annual surveillance (around November 2020) demonstrate that a plan is in place to ensure the management system can respond to serious and other important issues and uses the precautionary approach in decision-making as issues arise through research, monitoring, evaluation and consultation. By the 3rd annual surveillance audit (around November 2021) demonstrate that this plan is being c…	Open	transparent
Alaska salmon	Certified	Alaska salmon	Default Tree v2.0 [Salmon]	3.2.2	Condition 9: Decision making	Pink(=Humpback) salmon- Bristol Bay	Salmons, trouts, smelts	Gillnets And Entangling Nets - Gillnets	Bristol Bay	While ADFG decision-making processes are generally responsive to serious issues identified through research, monitoring, evaluation and consultation, it is not clear that they do so for all Ã¢â‚¬Å“serious and other important issuesÃ¢â‚¬Â as required by SG80 scoring issue B. New information presented by stakeholders regarding specific important issues (e.g. straying of chum salmon into West Crawf…	AFDF ACTION: AFDF will work with ADFG and NSRAA to document evidence of actions taken in response to new and unexpected information related to LCI and WCI hatchery strays. Additionally, AFDF will report on ADFGÃ¢â‚¬â„¢s progress towards implementation of the proposal presented at the March 7th, 2020 BOF Hatchery Committee Meeting, which outlined a third-party convening of a working group of agenc…	By the 2nd annual surveillance (around November 2020) demonstrate that a plan is in place to ensure the management system can respond to serious and other important issues and uses the precautionary approach in decision-making as issues arise through research, monitoring, evaluation and consultation. By the 3rd annual surveillance audit (around November 2021) demonstrate that this plan is being c…	Open	transparent
Alaska salmon	Certified	Alaska salmon	Default Tree v2.0 [Salmon]	3.2.2	Condition 9: Decision making	Pink(=Humpback) salmon- Kuskokwim	Salmons, trouts, smelts	Gillnets And Entangling Nets - Driftnets	Kuskokwim	While ADFG decision-making processes are generally responsive to serious issues identified through research, monitoring, evaluation and consultation, it is not clear that they do so for all Ã¢â‚¬Å“serious and other important issuesÃ¢â‚¬Â as required by SG80 scoring issue B. New information presented by stakeholders regarding specific important issues (e.g. straying of chum salmon into West Crawf…	AFDF ACTION: AFDF will work with ADFG and NSRAA to document evidence of actions taken in response to new and unexpected information related to LCI and WCI hatchery strays. Additionally, AFDF will report on ADFGÃ¢â‚¬â„¢s progress towards implementation of the proposal presented at the March 7th, 2020 BOF Hatchery Committee Meeting, which outlined a third-party convening of a working group of agenc…	By the 2nd annual surveillance (around November 2020) demonstrate that a plan is in place to ensure the management system can respond to serious and other important issues and uses the precautionary approach in decision-making as issues arise through research, monitoring, evaluation and consultation. By the 3rd annual surveillance audit (around November 2021) demonstrate that this plan is being c…	Open	transparent
Alaska salmon	Certified	Alaska salmon	Default Tree v2.0 [Salmon]	3.2.2	Condition 9: Decision making	Pink(=Humpback) salmon- Kuskokwim	Salmons, trouts, smelts	Gillnets And Entangling Nets - Gillnets	Kuskokwim	While ADFG decision-making processes are generally responsive to serious issues identified through research, monitoring, evaluation and consultation, it is not clear that they do so for all Ã¢â‚¬Å“serious and other important issuesÃ¢â‚¬Â as required by SG80 scoring issue B. New information presented by stakeholders regarding specific important issues (e.g. straying of chum salmon into West Crawf…	AFDF ACTION: AFDF will work with ADFG and NSRAA to document evidence of actions taken in response to new and unexpected information related to LCI and WCI hatchery strays. Additionally, AFDF will report on ADFGÃ¢â‚¬â„¢s progress towards implementation of the proposal presented at the March 7th, 2020 BOF Hatchery Committee Meeting, which outlined a third-party convening of a working group of agenc…	By the 2nd annual surveillance (around November 2020) demonstrate that a plan is in place to ensure the management system can respond to serious and other important issues and uses the precautionary approach in decision-making as issues arise through research, monitoring, evaluation and consultation. By the 3rd annual surveillance audit (around November 2021) demonstrate that this plan is being c…	Open	transparent
Alaska salmon	Certified	Alaska salmon	Default Tree v2.0 [Salmon]	3.2.2	Condition 9: Decision making	Pink(=Humpback) salmon- Norton Sound	Salmons, trouts, smelts	Gillnets And Entangling Nets - Gillnets	Norton Sound	While ADFG decision-making processes are generally responsive to serious issues identified through research, monitoring, evaluation and consultation, it is not clear that they do so for all Ã¢â‚¬Å“serious and other important issuesÃ¢â‚¬Â as required by SG80 scoring issue B. New information presented by stakeholders regarding specific important issues (e.g. straying of chum salmon into West Crawf…	AFDF ACTION: AFDF will work with ADFG and NSRAA to document evidence of actions taken in response to new and unexpected information related to LCI and WCI hatchery strays. Additionally, AFDF will report on ADFGÃ¢â‚¬â„¢s progress towards implementation of the proposal presented at the March 7th, 2020 BOF Hatchery Committee Meeting, which outlined a third-party convening of a working group of agenc…	By the 2nd annual surveillance (around November 2020) demonstrate that a plan is in place to ensure the management system can respond to serious and other important issues and uses the precautionary approach in decision-making as issues arise through research, monitoring, evaluation and consultation. By the 3rd annual surveillance audit (around November 2021) demonstrate that this plan is being c…	Open	transparent
Alaska salmon	Certified	Alaska salmon	Default Tree v2.0 [Salmon]	3.2.2	Condition 9: Decision making	Pink(=Humpback) salmon- Kodiak	Salmons, trouts, smelts	Seine Nets	Kodiak	While ADFG decision-making processes are generally responsive to serious issues identified through research, monitoring, evaluation and consultation, it is not clear that they do so for all Ã¢â‚¬Å“serious and other important issuesÃ¢â‚¬Â as required by SG80 scoring issue B. New information presented by stakeholders regarding specific important issues (e.g. straying of chum salmon into West Crawf…	AFDF ACTION: AFDF will work with ADFG and NSRAA to document evidence of actions taken in response to new and unexpected information related to LCI and WCI hatchery strays. Additionally, AFDF will report on ADFGÃ¢â‚¬â„¢s progress towards implementation of the proposal presented at the March 7th, 2020 BOF Hatchery Committee Meeting, which outlined a third-party convening of a working group of agenc…	By the 2nd annual surveillance (around November 2020) demonstrate that a plan is in place to ensure the management system can respond to serious and other important issues and uses the precautionary approach in decision-making as issues arise through research, monitoring, evaluation and consultation. By the 3rd annual surveillance audit (around November 2021) demonstrate that this plan is being c…	Open	transparent
Alaska salmon	Certified	Alaska salmon	Default Tree v2.0 [Salmon]	3.2.2	Condition 9: Decision making	Pink(=Humpback) salmon- Kodiak	Salmons, trouts, smelts	Gillnets And Entangling Nets - Gillnets	Kodiak	While ADFG decision-making processes are generally responsive to serious issues identified through research, monitoring, evaluation and consultation, it is not clear that they do so for all Ã¢â‚¬Å“serious and other important issuesÃ¢â‚¬Â as required by SG80 scoring issue B. New information presented by stakeholders regarding specific important issues (e.g. straying of chum salmon into West Crawf…	AFDF ACTION: AFDF will work with ADFG and NSRAA to document evidence of actions taken in response to new and unexpected information related to LCI and WCI hatchery strays. Additionally, AFDF will report on ADFGÃ¢â‚¬â„¢s progress towards implementation of the proposal presented at the March 7th, 2020 BOF Hatchery Committee Meeting, which outlined a third-party convening of a working group of agenc…	By the 2nd annual surveillance (around November 2020) demonstrate that a plan is in place to ensure the management system can respond to serious and other important issues and uses the precautionary approach in decision-making as issues arise through research, monitoring, evaluation and consultation. By the 3rd annual surveillance audit (around November 2021) demonstrate that this plan is being c…	Open	transparent
Alaska salmon	Certified	Alaska salmon	Default Tree v2.0 [Salmon]	3.2.2	Condition 9: Decision making	Pink(=Humpback) salmon- Kodiak	Salmons, trouts, smelts	Surrounding Nets - With purse lines (purse seines)	Kodiak	While ADFG decision-making processes are generally responsive to serious issues identified through research, monitoring, evaluation and consultation, it is not clear that they do so for all Ã¢â‚¬Å“serious and other important issuesÃ¢â‚¬Â as required by SG80 scoring issue B. New information presented by stakeholders regarding specific important issues (e.g. straying of chum salmon into West Crawf…	AFDF ACTION: AFDF will work with ADFG and NSRAA to document evidence of actions taken in response to new and unexpected information related to LCI and WCI hatchery strays. Additionally, AFDF will report on ADFGÃ¢â‚¬â„¢s progress towards implementation of the proposal presented at the March 7th, 2020 BOF Hatchery Committee Meeting, which outlined a third-party convening of a working group of agenc…	By the 2nd annual surveillance (around November 2020) demonstrate that a plan is in place to ensure the management system can respond to serious and other important issues and uses the precautionary approach in decision-making as issues arise through research, monitoring, evaluation and consultation. By the 3rd annual surveillance audit (around November 2021) demonstrate that this plan is being c…	Open	transparent
Alaska salmon	Certified	Alaska salmon	Default Tree v2.0 [Salmon]	3.2.2	Condition 9: Decision making	Pink(=Humpback) salmon- Chignik	Salmons, trouts, smelts	Surrounding Nets - With purse lines (purse seines)	Chignik	While ADFG decision-making processes are generally responsive to serious issues identified through research, monitoring, evaluation and consultation, it is not clear that they do so for all Ã¢â‚¬Å“serious and other important issuesÃ¢â‚¬Â as required by SG80 scoring issue B. New information presented by stakeholders regarding specific important issues (e.g. straying of chum salmon into West Crawf…	AFDF ACTION: AFDF will work with ADFG and NSRAA to document evidence of actions taken in response to new and unexpected information related to LCI and WCI hatchery strays. Additionally, AFDF will report on ADFGÃ¢â‚¬â„¢s progress towards implementation of the proposal presented at the March 7th, 2020 BOF Hatchery Committee Meeting, which outlined a third-party convening of a working group of agenc…	By the 2nd annual surveillance (around November 2020) demonstrate that a plan is in place to ensure the management system can respond to serious and other important issues and uses the precautionary approach in decision-making as issues arise through research, monitoring, evaluation and consultation. By the 3rd annual surveillance audit (around November 2021) demonstrate that this plan is being c…	Open	transparent
Alaska salmon	Certified	Alaska salmon	Default Tree v2.0 [Salmon]	3.2.2	Condition 9: Decision making	Pink(=Humpback) salmon- Peninsula/Aleutian Is.	Salmons, trouts, smelts	Surrounding Nets - With purse lines (purse seines)	Peninsula	While ADFG decision-making processes are generally responsive to serious issues identified through research, monitoring, evaluation and consultation, it is not clear that they do so for all Ã¢â‚¬Å“serious and other important issuesÃ¢â‚¬Â as required by SG80 scoring issue B. New information presented by stakeholders regarding specific important issues (e.g. straying of chum salmon into West Crawf…	AFDF ACTION: AFDF will work with ADFG and NSRAA to document evidence of actions taken in response to new and unexpected information related to LCI and WCI hatchery strays. Additionally, AFDF will report on ADFGÃ¢â‚¬â„¢s progress towards implementation of the proposal presented at the March 7th, 2020 BOF Hatchery Committee Meeting, which outlined a third-party convening of a working group of agenc…	By the 2nd annual surveillance (around November 2020) demonstrate that a plan is in place to ensure the management system can respond to serious and other important issues and uses the precautionary approach in decision-making as issues arise through research, monitoring, evaluation and consultation. By the 3rd annual surveillance audit (around November 2021) demonstrate that this plan is being c…	Open	transparent
Alaska salmon	Certified	Alaska salmon	Default Tree v2.0 [Salmon]	3.2.2	Condition 9: Decision making	Pink(=Humpback) salmon- Peninsula/Aleutian Is.	Salmons, trouts, smelts	Seine Nets	Peninsula	While ADFG decision-making processes are generally responsive to serious issues identified through research, monitoring, evaluation and consultation, it is not clear that they do so for all Ã¢â‚¬Å“serious and other important issuesÃ¢â‚¬Â as required by SG80 scoring issue B. New information presented by stakeholders regarding specific important issues (e.g. straying of chum salmon into West Crawf…	AFDF ACTION: AFDF will work with ADFG and NSRAA to document evidence of actions taken in response to new and unexpected information related to LCI and WCI hatchery strays. Additionally, AFDF will report on ADFGÃ¢â‚¬â„¢s progress towards implementation of the proposal presented at the March 7th, 2020 BOF Hatchery Committee Meeting, which outlined a third-party convening of a working group of agenc…	By the 2nd annual surveillance (around November 2020) demonstrate that a plan is in place to ensure the management system can respond to serious and other important issues and uses the precautionary approach in decision-making as issues arise through research, monitoring, evaluation and consultation. By the 3rd annual surveillance audit (around November 2021) demonstrate that this plan is being c…	Open	transparent
Alaska salmon	Certified	Alaska salmon	Default Tree v2.0 [Salmon]	3.2.2	Condition 9: Decision making	Pink(=Humpback) salmon- Peninsula/Aleutian Is.	Salmons, trouts, smelts	Gillnets And Entangling Nets - Driftnets	Peninsula	While ADFG decision-making processes are generally responsive to serious issues identified through research, monitoring, evaluation and consultation, it is not clear that they do so for all Ã¢â‚¬Å“serious and other important issuesÃ¢â‚¬Â as required by SG80 scoring issue B. New information presented by stakeholders regarding specific important issues (e.g. straying of chum salmon into West Crawf…	AFDF ACTION: AFDF will work with ADFG and NSRAA to document evidence of actions taken in response to new and unexpected information related to LCI and WCI hatchery strays. Additionally, AFDF will report on ADFGÃ¢â‚¬â„¢s progress towards implementation of the proposal presented at the March 7th, 2020 BOF Hatchery Committee Meeting, which outlined a third-party convening of a working group of agenc…	By the 2nd annual surveillance (around November 2020) demonstrate that a plan is in place to ensure the management system can respond to serious and other important issues and uses the precautionary approach in decision-making as issues arise through research, monitoring, evaluation and consultation. By the 3rd annual surveillance audit (around November 2021) demonstrate that this plan is being c…	Open	transparent
Alaska salmon	Certified	Alaska salmon	Default Tree v2.0 [Salmon]	3.2.2	Condition 9: Decision making	Pink(=Humpback) salmon- Peninsula/Aleutian Is.	Salmons, trouts, smelts	Gillnets And Entangling Nets - Gillnets	Peninsula	While ADFG decision-making processes are generally responsive to serious issues identified through research, monitoring, evaluation and consultation, it is not clear that they do so for all Ã¢â‚¬Å“serious and other important issuesÃ¢â‚¬Â as required by SG80 scoring issue B. New information presented by stakeholders regarding specific important issues (e.g. straying of chum salmon into West Crawf…	AFDF ACTION: AFDF will work with ADFG and NSRAA to document evidence of actions taken in response to new and unexpected information related to LCI and WCI hatchery strays. Additionally, AFDF will report on ADFGÃ¢â‚¬â„¢s progress towards implementation of the proposal presented at the March 7th, 2020 BOF Hatchery Committee Meeting, which outlined a third-party convening of a working group of agenc…	By the 2nd annual surveillance (around November 2020) demonstrate that a plan is in place to ensure the management system can respond to serious and other important issues and uses the precautionary approach in decision-making as issues arise through research, monitoring, evaluation and consultation. By the 3rd annual surveillance audit (around November 2021) demonstrate that this plan is being c…	Open	transparent
Alaska salmon	Certified	Alaska salmon	Default Tree v2.0 [Salmon]	3.2.2	Condition 9: Decision making	Chum(=Keta=Dog) salmon- Prince William Sound	Salmons, trouts, smelts	Seine Nets	Prince William Sound	While ADFG decision-making processes are generally responsive to serious issues identified through research, monitoring, evaluation and consultation, it is not clear that they do so for all Ã¢â‚¬Å“serious and other important issuesÃ¢â‚¬Â as required by SG80 scoring issue B. New information presented by stakeholders regarding specific important issues (e.g. straying of chum salmon into West Crawf…	AFDF ACTION: AFDF will work with ADFG and NSRAA to document evidence of actions taken in response to new and unexpected information related to LCI and WCI hatchery strays. Additionally, AFDF will report on ADFGÃ¢â‚¬â„¢s progress towards implementation of the proposal presented at the March 7th, 2020 BOF Hatchery Committee Meeting, which outlined a third-party convening of a working group of agenc…	By the 2nd annual surveillance (around November 2020) demonstrate that a plan is in place to ensure the management system can respond to serious and other important issues and uses the precautionary approach in decision-making as issues arise through research, monitoring, evaluation and consultation. By the 3rd annual surveillance audit (around November 2021) demonstrate that this plan is being c…	Open	transparent
Alaska salmon	Certified	Alaska salmon	Default Tree v2.0 [Salmon]	3.2.2	Condition 9: Decision making	Chum(=Keta=Dog) salmon- Prince William Sound	Salmons, trouts, smelts	Gillnets And Entangling Nets - Driftnets	Prince William Sound	While ADFG decision-making processes are generally responsive to serious issues identified through research, monitoring, evaluation and consultation, it is not clear that they do so for all Ã¢â‚¬Å“serious and other important issuesÃ¢â‚¬Â as required by SG80 scoring issue B. New information presented by stakeholders regarding specific important issues (e.g. straying of chum salmon into West Crawf…	AFDF ACTION: AFDF will work with ADFG and NSRAA to document evidence of actions taken in response to new and unexpected information related to LCI and WCI hatchery strays. Additionally, AFDF will report on ADFGÃ¢â‚¬â„¢s progress towards implementation of the proposal presented at the March 7th, 2020 BOF Hatchery Committee Meeting, which outlined a third-party convening of a working group of agenc…	By the 2nd annual surveillance (around November 2020) demonstrate that a plan is in place to ensure the management system can respond to serious and other important issues and uses the precautionary approach in decision-making as issues arise through research, monitoring, evaluation and consultation. By the 3rd annual surveillance audit (around November 2021) demonstrate that this plan is being c…	Open	transparent
Alaska salmon	Certified	Alaska salmon	Default Tree v2.0 [Salmon]	3.2.2	Condition 9: Decision making	Chum(=Keta=Dog) salmon- Prince William Sound	Salmons, trouts, smelts	Gillnets And Entangling Nets - Gillnets	Prince William Sound	While ADFG decision-making processes are generally responsive to serious issues identified through research, monitoring, evaluation and consultation, it is not clear that they do so for all Ã¢â‚¬Å“serious and other important issuesÃ¢â‚¬Â as required by SG80 scoring issue B. New information presented by stakeholders regarding specific important issues (e.g. straying of chum salmon into West Crawf…	AFDF ACTION: AFDF will work with ADFG and NSRAA to document evidence of actions taken in response to new and unexpected information related to LCI and WCI hatchery strays. Additionally, AFDF will report on ADFGÃ¢â‚¬â„¢s progress towards implementation of the proposal presented at the March 7th, 2020 BOF Hatchery Committee Meeting, which outlined a third-party convening of a working group of agenc…	By the 2nd annual surveillance (around November 2020) demonstrate that a plan is in place to ensure the management system can respond to serious and other important issues and uses the precautionary approach in decision-making as issues arise through research, monitoring, evaluation and consultation. By the 3rd annual surveillance audit (around November 2021) demonstrate that this plan is being c…	Open	transparent
Alaska salmon	Certified	Alaska salmon	Default Tree v2.0 [Salmon]	3.2.2	Condition 9: Decision making	Chum(=Keta=Dog) salmon- Lower Cook Inlet	Salmons, trouts, smelts	Surrounding Nets - With purse lines (purse seines)	Lower Cook Inlet	While ADFG decision-making processes are generally responsive to serious issues identified through research, monitoring, evaluation and consultation, it is not clear that they do so for all Ã¢â‚¬Å“serious and other important issuesÃ¢â‚¬Â as required by SG80 scoring issue B. New information presented by stakeholders regarding specific important issues (e.g. straying of chum salmon into West Crawf…	AFDF ACTION: AFDF will work with ADFG and NSRAA to document evidence of actions taken in response to new and unexpected information related to LCI and WCI hatchery strays. Additionally, AFDF will report on ADFGÃ¢â‚¬â„¢s progress towards implementation of the proposal presented at the March 7th, 2020 BOF Hatchery Committee Meeting, which outlined a third-party convening of a working group of agenc…	By the 2nd annual surveillance (around November 2020) demonstrate that a plan is in place to ensure the management system can respond to serious and other important issues and uses the precautionary approach in decision-making as issues arise through research, monitoring, evaluation and consultation. By the 3rd annual surveillance audit (around November 2021) demonstrate that this plan is being c…	Open	transparent
Alaska salmon	Certified	Alaska salmon	Default Tree v2.0 [Salmon]	3.2.2	Condition 9: Decision making	Chum(=Keta=Dog) salmon- Lower Cook Inlet	Salmons, trouts, smelts	Gillnets And Entangling Nets - Gillnets	Lower Cook Inlet	While ADFG decision-making processes are generally responsive to serious issues identified through research, monitoring, evaluation and consultation, it is not clear that they do so for all Ã¢â‚¬Å“serious and other important issuesÃ¢â‚¬Â as required by SG80 scoring issue B. New information presented by stakeholders regarding specific important issues (e.g. straying of chum salmon into West Crawf…	AFDF ACTION: AFDF will work with ADFG and NSRAA to document evidence of actions taken in response to new and unexpected information related to LCI and WCI hatchery strays. Additionally, AFDF will report on ADFGÃ¢â‚¬â„¢s progress towards implementation of the proposal presented at the March 7th, 2020 BOF Hatchery Committee Meeting, which outlined a third-party convening of a working group of agenc…	By the 2nd annual surveillance (around November 2020) demonstrate that a plan is in place to ensure the management system can respond to serious and other important issues and uses the precautionary approach in decision-making as issues arise through research, monitoring, evaluation and consultation. By the 3rd annual surveillance audit (around November 2021) demonstrate that this plan is being c…	Open	transparent
Alaska salmon	Certified	Alaska salmon	Default Tree v2.0 [Salmon]	3.2.2	Condition 9: Decision making	Chum(=Keta=Dog) salmon- Upper Cook Inlet	Salmons, trouts, smelts	Gillnets And Entangling Nets - Driftnets	Upper Cook Inlet	While ADFG decision-making processes are generally responsive to serious issues identified through research, monitoring, evaluation and consultation, it is not clear that they do so for all Ã¢â‚¬Å“serious and other important issuesÃ¢â‚¬Â as required by SG80 scoring issue B. New information presented by stakeholders regarding specific important issues (e.g. straying of chum salmon into West Crawf…	AFDF ACTION: AFDF will work with ADFG and NSRAA to document evidence of actions taken in response to new and unexpected information related to LCI and WCI hatchery strays. Additionally, AFDF will report on ADFGÃ¢â‚¬â„¢s progress towards implementation of the proposal presented at the March 7th, 2020 BOF Hatchery Committee Meeting, which outlined a third-party convening of a working group of agenc…	By the 2nd annual surveillance (around November 2020) demonstrate that a plan is in place to ensure the management system can respond to serious and other important issues and uses the precautionary approach in decision-making as issues arise through research, monitoring, evaluation and consultation. By the 3rd annual surveillance audit (around November 2021) demonstrate that this plan is being c…	Open	transparent
Alaska salmon	Certified	Alaska salmon	Default Tree v2.0 [Salmon]	3.2.2	Condition 9: Decision making	Chum(=Keta=Dog) salmon- Upper Cook Inlet	Salmons, trouts, smelts	Gillnets And Entangling Nets - Gillnets	Upper Cook Inlet	While ADFG decision-making processes are generally responsive to serious issues identified through research, monitoring, evaluation and consultation, it is not clear that they do so for all Ã¢â‚¬Å“serious and other important issuesÃ¢â‚¬Â as required by SG80 scoring issue B. New information presented by stakeholders regarding specific important issues (e.g. straying of chum salmon into West Crawf…	AFDF ACTION: AFDF will work with ADFG and NSRAA to document evidence of actions taken in response to new and unexpected information related to LCI and WCI hatchery strays. Additionally, AFDF will report on ADFGÃ¢â‚¬â„¢s progress towards implementation of the proposal presented at the March 7th, 2020 BOF Hatchery Committee Meeting, which outlined a third-party convening of a working group of agenc…	By the 2nd annual surveillance (around November 2020) demonstrate that a plan is in place to ensure the management system can respond to serious and other important issues and uses the precautionary approach in decision-making as issues arise through research, monitoring, evaluation and consultation. By the 3rd annual surveillance audit (around November 2021) demonstrate that this plan is being c…	Open	transparent
Alaska salmon	Certified	Alaska salmon	Default Tree v2.0 [Salmon]	3.2.2	Condition 9: Decision making	Chum(=Keta=Dog) salmon- Bristol Bay	Salmons, trouts, smelts	Gillnets And Entangling Nets - Driftnets	Bristol Bay	While ADFG decision-making processes are generally responsive to serious issues identified through research, monitoring, evaluation and consultation, it is not clear that they do so for all Ã¢â‚¬Å“serious and other important issuesÃ¢â‚¬Â as required by SG80 scoring issue B. New information presented by stakeholders regarding specific important issues (e.g. straying of chum salmon into West Crawf…	AFDF ACTION: AFDF will work with ADFG and NSRAA to document evidence of actions taken in response to new and unexpected information related to LCI and WCI hatchery strays. Additionally, AFDF will report on ADFGÃ¢â‚¬â„¢s progress towards implementation of the proposal presented at the March 7th, 2020 BOF Hatchery Committee Meeting, which outlined a third-party convening of a working group of agenc…	By the 2nd annual surveillance (around November 2020) demonstrate that a plan is in place to ensure the management system can respond to serious and other important issues and uses the precautionary approach in decision-making as issues arise through research, monitoring, evaluation and consultation. By the 3rd annual surveillance audit (around November 2021) demonstrate that this plan is being c…	Open	transparent
Alaska salmon	Certified	Alaska salmon	Default Tree v2.0 [Salmon]	3.2.2	Condition 9: Decision making	Chum(=Keta=Dog) salmon- Bristol Bay	Salmons, trouts, smelts	Gillnets And Entangling Nets - Gillnets	Bristol Bay	While ADFG decision-making processes are generally responsive to serious issues identified through research, monitoring, evaluation and consultation, it is not clear that they do so for all Ã¢â‚¬Å“serious and other important issuesÃ¢â‚¬Â as required by SG80 scoring issue B. New information presented by stakeholders regarding specific important issues (e.g. straying of chum salmon into West Crawf…	AFDF ACTION: AFDF will work with ADFG and NSRAA to document evidence of actions taken in response to new and unexpected information related to LCI and WCI hatchery strays. Additionally, AFDF will report on ADFGÃ¢â‚¬â„¢s progress towards implementation of the proposal presented at the March 7th, 2020 BOF Hatchery Committee Meeting, which outlined a third-party convening of a working group of agenc…	By the 2nd annual surveillance (around November 2020) demonstrate that a plan is in place to ensure the management system can respond to serious and other important issues and uses the precautionary approach in decision-making as issues arise through research, monitoring, evaluation and consultation. By the 3rd annual surveillance audit (around November 2021) demonstrate that this plan is being c…	Open	transparent
Alaska salmon	Certified	Alaska salmon	Default Tree v2.0 [Salmon]	3.2.2	Condition 9: Decision making	Chum(=Keta=Dog) salmon- Kuskokwim	Salmons, trouts, smelts	Gillnets And Entangling Nets - Driftnets	Kuskokwim	While ADFG decision-making processes are generally responsive to serious issues identified through research, monitoring, evaluation and consultation, it is not clear that they do so for all Ã¢â‚¬Å“serious and other important issuesÃ¢â‚¬Â as required by SG80 scoring issue B. New information presented by stakeholders regarding specific important issues (e.g. straying of chum salmon into West Crawf…	AFDF ACTION: AFDF will work with ADFG and NSRAA to document evidence of actions taken in response to new and unexpected information related to LCI and WCI hatchery strays. Additionally, AFDF will report on ADFGÃ¢â‚¬â„¢s progress towards implementation of the proposal presented at the March 7th, 2020 BOF Hatchery Committee Meeting, which outlined a third-party convening of a working group of agenc…	By the 2nd annual surveillance (around November 2020) demonstrate that a plan is in place to ensure the management system can respond to serious and other important issues and uses the precautionary approach in decision-making as issues arise through research, monitoring, evaluation and consultation. By the 3rd annual surveillance audit (around November 2021) demonstrate that this plan is being c…	Open	transparent
Alaska salmon	Certified	Alaska salmon	Default Tree v2.0 [Salmon]	3.2.2	Condition 9: Decision making	Chum(=Keta=Dog) salmon- Kuskokwim	Salmons, trouts, smelts	Gillnets And Entangling Nets - Gillnets	Kuskokwim	While ADFG decision-making processes are generally responsive to serious issues identified through research, monitoring, evaluation and consultation, it is not clear that they do so for all Ã¢â‚¬Å“serious and other important issuesÃ¢â‚¬Â as required by SG80 scoring issue B. New information presented by stakeholders regarding specific important issues (e.g. straying of chum salmon into West Crawf…	AFDF ACTION: AFDF will work with ADFG and NSRAA to document evidence of actions taken in response to new and unexpected information related to LCI and WCI hatchery strays. Additionally, AFDF will report on ADFGÃ¢â‚¬â„¢s progress towards implementation of the proposal presented at the March 7th, 2020 BOF Hatchery Committee Meeting, which outlined a third-party convening of a working group of agenc…	By the 2nd annual surveillance (around November 2020) demonstrate that a plan is in place to ensure the management system can respond to serious and other important issues and uses the precautionary approach in decision-making as issues arise through research, monitoring, evaluation and consultation. By the 3rd annual surveillance audit (around November 2021) demonstrate that this plan is being c…	Open	transparent
Alaska salmon	Certified	Alaska salmon	Default Tree v2.0 [Salmon]	3.2.2	Condition 9: Decision making	Chum(=Keta=Dog) salmon- Kotzebue	Salmons, trouts, smelts	Gillnets And Entangling Nets - Gillnets	Kotzebue	While ADFG decision-making processes are generally responsive to serious issues identified through research, monitoring, evaluation and consultation, it is not clear that they do so for all Ã¢â‚¬Å“serious and other important issuesÃ¢â‚¬Â as required by SG80 scoring issue B. New information presented by stakeholders regarding specific important issues (e.g. straying of chum salmon into West Crawf…	AFDF ACTION: AFDF will work with ADFG and NSRAA to document evidence of actions taken in response to new and unexpected information related to LCI and WCI hatchery strays. Additionally, AFDF will report on ADFGÃ¢â‚¬â„¢s progress towards implementation of the proposal presented at the March 7th, 2020 BOF Hatchery Committee Meeting, which outlined a third-party convening of a working group of agenc…	By the 2nd annual surveillance (around November 2020) demonstrate that a plan is in place to ensure the management system can respond to serious and other important issues and uses the precautionary approach in decision-making as issues arise through research, monitoring, evaluation and consultation. By the 3rd annual surveillance audit (around November 2021) demonstrate that this plan is being c…	Open	transparent
Alaska salmon	Certified	Alaska salmon	Default Tree v2.0 [Salmon]	3.2.2	Condition 9: Decision making	Chum(=Keta=Dog) salmon- Norton Sound	Salmons, trouts, smelts	Gillnets And Entangling Nets - Gillnets	Norton Sound	While ADFG decision-making processes are generally responsive to serious issues identified through research, monitoring, evaluation and consultation, it is not clear that they do so for all Ã¢â‚¬Å“serious and other important issuesÃ¢â‚¬Â as required by SG80 scoring issue B. New information presented by stakeholders regarding specific important issues (e.g. straying of chum salmon into West Crawf…	AFDF ACTION: AFDF will work with ADFG and NSRAA to document evidence of actions taken in response to new and unexpected information related to LCI and WCI hatchery strays. Additionally, AFDF will report on ADFGÃ¢â‚¬â„¢s progress towards implementation of the proposal presented at the March 7th, 2020 BOF Hatchery Committee Meeting, which outlined a third-party convening of a working group of agenc…	By the 2nd annual surveillance (around November 2020) demonstrate that a plan is in place to ensure the management system can respond to serious and other important issues and uses the precautionary approach in decision-making as issues arise through research, monitoring, evaluation and consultation. By the 3rd annual surveillance audit (around November 2021) demonstrate that this plan is being c…	Open	transparent
Alaska salmon	Certified	Alaska salmon	Default Tree v2.0 [Salmon]	3.2.2	Condition 9: Decision making	Chum(=Keta=Dog) salmon- Kodiak	Salmons, trouts, smelts	Gillnets And Entangling Nets - Gillnets	Kodiak	While ADFG decision-making processes are generally responsive to serious issues identified through research, monitoring, evaluation and consultation, it is not clear that they do so for all Ã¢â‚¬Å“serious and other important issuesÃ¢â‚¬Â as required by SG80 scoring issue B. New information presented by stakeholders regarding specific important issues (e.g. straying of chum salmon into West Crawf…	AFDF ACTION: AFDF will work with ADFG and NSRAA to document evidence of actions taken in response to new and unexpected information related to LCI and WCI hatchery strays. Additionally, AFDF will report on ADFGÃ¢â‚¬â„¢s progress towards implementation of the proposal presented at the March 7th, 2020 BOF Hatchery Committee Meeting, which outlined a third-party convening of a working group of agenc…	By the 2nd annual surveillance (around November 2020) demonstrate that a plan is in place to ensure the management system can respond to serious and other important issues and uses the precautionary approach in decision-making as issues arise through research, monitoring, evaluation and consultation. By the 3rd annual surveillance audit (around November 2021) demonstrate that this plan is being c…	Open	transparent
Alaska salmon	Certified	Alaska salmon	Default Tree v2.0 [Salmon]	3.2.2	Condition 9: Decision making	Chum(=Keta=Dog) salmon- Kodiak	Salmons, trouts, smelts	Surrounding Nets - With purse lines (purse seines)	Kodiak	While ADFG decision-making processes are generally responsive to serious issues identified through research, monitoring, evaluation and consultation, it is not clear that they do so for all Ã¢â‚¬Å“serious and other important issuesÃ¢â‚¬Â as required by SG80 scoring issue B. New information presented by stakeholders regarding specific important issues (e.g. straying of chum salmon into West Crawf…	AFDF ACTION: AFDF will work with ADFG and NSRAA to document evidence of actions taken in response to new and unexpected information related to LCI and WCI hatchery strays. Additionally, AFDF will report on ADFGÃ¢â‚¬â„¢s progress towards implementation of the proposal presented at the March 7th, 2020 BOF Hatchery Committee Meeting, which outlined a third-party convening of a working group of agenc…	By the 2nd annual surveillance (around November 2020) demonstrate that a plan is in place to ensure the management system can respond to serious and other important issues and uses the precautionary approach in decision-making as issues arise through research, monitoring, evaluation and consultation. By the 3rd annual surveillance audit (around November 2021) demonstrate that this plan is being c…	Open	transparent
Alaska salmon	Certified	Alaska salmon	Default Tree v2.0 [Salmon]	3.2.2	Condition 9: Decision making	Chum(=Keta=Dog) salmon- Kodiak	Salmons, trouts, smelts	Seine Nets	Kodiak	While ADFG decision-making processes are generally responsive to serious issues identified through research, monitoring, evaluation and consultation, it is not clear that they do so for all Ã¢â‚¬Å“serious and other important issuesÃ¢â‚¬Â as required by SG80 scoring issue B. New information presented by stakeholders regarding specific important issues (e.g. straying of chum salmon into West Crawf…	AFDF ACTION: AFDF will work with ADFG and NSRAA to document evidence of actions taken in response to new and unexpected information related to LCI and WCI hatchery strays. Additionally, AFDF will report on ADFGÃ¢â‚¬â„¢s progress towards implementation of the proposal presented at the March 7th, 2020 BOF Hatchery Committee Meeting, which outlined a third-party convening of a working group of agenc…	By the 2nd annual surveillance (around November 2020) demonstrate that a plan is in place to ensure the management system can respond to serious and other important issues and uses the precautionary approach in decision-making as issues arise through research, monitoring, evaluation and consultation. By the 3rd annual surveillance audit (around November 2021) demonstrate that this plan is being c…	Open	transparent
Alaska salmon	Certified	Alaska salmon	Default Tree v2.0 [Salmon]	3.2.2	Condition 9: Decision making	Chum(=Keta=Dog) salmon- Chignik	Salmons, trouts, smelts	Surrounding Nets - With purse lines (purse seines)	Chignik	While ADFG decision-making processes are generally responsive to serious issues identified through research, monitoring, evaluation and consultation, it is not clear that they do so for all Ã¢â‚¬Å“serious and other important issuesÃ¢â‚¬Â as required by SG80 scoring issue B. New information presented by stakeholders regarding specific important issues (e.g. straying of chum salmon into West Crawf…	AFDF ACTION: AFDF will work with ADFG and NSRAA to document evidence of actions taken in response to new and unexpected information related to LCI and WCI hatchery strays. Additionally, AFDF will report on ADFGÃ¢â‚¬â„¢s progress towards implementation of the proposal presented at the March 7th, 2020 BOF Hatchery Committee Meeting, which outlined a third-party convening of a working group of agenc…	By the 2nd annual surveillance (around November 2020) demonstrate that a plan is in place to ensure the management system can respond to serious and other important issues and uses the precautionary approach in decision-making as issues arise through research, monitoring, evaluation and consultation. By the 3rd annual surveillance audit (around November 2021) demonstrate that this plan is being c…	Open	transparent
Alaska salmon	Certified	Alaska salmon	Default Tree v2.0 [Salmon]	3.2.2	Condition 9: Decision making	Chum(=Keta=Dog) salmon- Peninsula/Aleutian Is.	Salmons, trouts, smelts	Surrounding Nets - With purse lines (purse seines)	Peninsula	While ADFG decision-making processes are generally responsive to serious issues identified through research, monitoring, evaluation and consultation, it is not clear that they do so for all Ã¢â‚¬Å“serious and other important issuesÃ¢â‚¬Â as required by SG80 scoring issue B. New information presented by stakeholders regarding specific important issues (e.g. straying of chum salmon into West Crawf…	AFDF ACTION: AFDF will work with ADFG and NSRAA to document evidence of actions taken in response to new and unexpected information related to LCI and WCI hatchery strays. Additionally, AFDF will report on ADFGÃ¢â‚¬â„¢s progress towards implementation of the proposal presented at the March 7th, 2020 BOF Hatchery Committee Meeting, which outlined a third-party convening of a working group of agenc…	By the 2nd annual surveillance (around November 2020) demonstrate that a plan is in place to ensure the management system can respond to serious and other important issues and uses the precautionary approach in decision-making as issues arise through research, monitoring, evaluation and consultation. By the 3rd annual surveillance audit (around November 2021) demonstrate that this plan is being c…	Open	transparent
Alaska salmon	Certified	Alaska salmon	Default Tree v2.0 [Salmon]	3.2.2	Condition 9: Decision making	Chum(=Keta=Dog) salmon- Peninsula/Aleutian Is.	Salmons, trouts, smelts	Seine Nets	Peninsula	While ADFG decision-making processes are generally responsive to serious issues identified through research, monitoring, evaluation and consultation, it is not clear that they do so for all Ã¢â‚¬Å“serious and other important issuesÃ¢â‚¬Â as required by SG80 scoring issue B. New information presented by stakeholders regarding specific important issues (e.g. straying of chum salmon into West Crawf…	AFDF ACTION: AFDF will work with ADFG and NSRAA to document evidence of actions taken in response to new and unexpected information related to LCI and WCI hatchery strays. Additionally, AFDF will report on ADFGÃ¢â‚¬â„¢s progress towards implementation of the proposal presented at the March 7th, 2020 BOF Hatchery Committee Meeting, which outlined a third-party convening of a working group of agenc…	By the 2nd annual surveillance (around November 2020) demonstrate that a plan is in place to ensure the management system can respond to serious and other important issues and uses the precautionary approach in decision-making as issues arise through research, monitoring, evaluation and consultation. By the 3rd annual surveillance audit (around November 2021) demonstrate that this plan is being c…	Open	transparent
Alaska salmon	Certified	Alaska salmon	Default Tree v2.0 [Salmon]	3.2.2	Condition 9: Decision making	Chum(=Keta=Dog) salmon- Peninsula/Aleutian Is.	Salmons, trouts, smelts	Gillnets And Entangling Nets - Driftnets	Peninsula	While ADFG decision-making processes are generally responsive to serious issues identified through research, monitoring, evaluation and consultation, it is not clear that they do so for all Ã¢â‚¬Å“serious and other important issuesÃ¢â‚¬Â as required by SG80 scoring issue B. New information presented by stakeholders regarding specific important issues (e.g. straying of chum salmon into West Crawf…	AFDF ACTION: AFDF will work with ADFG and NSRAA to document evidence of actions taken in response to new and unexpected information related to LCI and WCI hatchery strays. Additionally, AFDF will report on ADFGÃ¢â‚¬â„¢s progress towards implementation of the proposal presented at the March 7th, 2020 BOF Hatchery Committee Meeting, which outlined a third-party convening of a working group of agenc…	By the 2nd annual surveillance (around November 2020) demonstrate that a plan is in place to ensure the management system can respond to serious and other important issues and uses the precautionary approach in decision-making as issues arise through research, monitoring, evaluation and consultation. By the 3rd annual surveillance audit (around November 2021) demonstrate that this plan is being c…	Open	transparent
Alaska salmon	Certified	Alaska salmon	Default Tree v2.0 [Salmon]	3.2.2	Condition 9: Decision making	Chum(=Keta=Dog) salmon- Peninsula/Aleutian Is.	Salmons, trouts, smelts	Gillnets And Entangling Nets - Gillnets	Peninsula	While ADFG decision-making processes are generally responsive to serious issues identified through research, monitoring, evaluation and consultation, it is not clear that they do so for all Ã¢â‚¬Å“serious and other important issuesÃ¢â‚¬Â as required by SG80 scoring issue B. New information presented by stakeholders regarding specific important issues (e.g. straying of chum salmon into West Crawf…	AFDF ACTION: AFDF will work with ADFG and NSRAA to document evidence of actions taken in response to new and unexpected information related to LCI and WCI hatchery strays. Additionally, AFDF will report on ADFGÃ¢â‚¬â„¢s progress towards implementation of the proposal presented at the March 7th, 2020 BOF Hatchery Committee Meeting, which outlined a third-party convening of a working group of agenc…	By the 2nd annual surveillance (around November 2020) demonstrate that a plan is in place to ensure the management system can respond to serious and other important issues and uses the precautionary approach in decision-making as issues arise through research, monitoring, evaluation and consultation. By the 3rd annual surveillance audit (around November 2021) demonstrate that this plan is being c…	Open	transparent
American Samoa EEZ Albacore and Yellowfin Longline Fishery	Certified	American Samoa EEZ Albacore and Yellowfin Longline Fishery	Default Tree v2.0	3.2.2	Condition 5: Decision Making Process	Albacore tuna South Pacific Ocean	Tunas, bonitos, billfishes	Hooks And Lines - Longlines	Albacore tuna	Rationale _x000D_ _x000D_ Commission decision-making processes are based heavily on Scientific Committee reports on the status of target and non-target species and respond to serious issues, such as overfishing, and suspected overfished (e.g. status of bigeye). However, at the Thirteenth Regular Session of the WCPFC, December 2016, the Ocean Fisheries Programme of SPC reported that although the S…	Background _x000D_ _x000D_ 1) The Commission has agreed to adopt a harvest strategy for South Pacific albacore. In 2017, the Commission is expected to adopt a South Pacific albacore TRP, which in order to achieve, will likely require reduction in the total catch. The TRP should address the serious economic conditions facing the fishery. _x000D_ _x000D_ 2) Also for 2017, FFA members are expected t…	_x000D_ _x000D_ Year 1: Some evidence that the Commission is responding to the issue of SP albacore catch rates, e.g. by progressing with the harvest strategy as per the agreed workplan, or some other evidence. (Score: 75) _x000D_ _x000D_ Year 2: Ditto. (Score: 75) _x000D_ _x000D_ Year 3: Ditto (Score: 75) _x000D_ _x000D_ Year 4: Decision-making processes have responded to the albacore catch rate…	Closed	transparent
American Samoa EEZ Albacore and Yellowfin Longline Fishery	Certified	American Samoa EEZ Albacore and Yellowfin Longline Fishery	Default Tree v2.0	3.2.2	Condition 5: Decision Making Process	Yellowfin tuna Central Western Pacific	Tunas, bonitos, billfishes	Hooks And Lines - Longlines	Yellowfin tuna	Rationale _x000D_ _x000D_ Commission decision-making processes are based heavily on Scientific Committee reports on the status of target and non-target species and respond to serious issues, such as overfishing, and suspected overfished (e.g. status of bigeye). However, at the Thirteenth Regular Session of the WCPFC, December 2016, the Ocean Fisheries Programme of SPC reported that although the S…	Background _x000D_ _x000D_ 1) The Commission has agreed to adopt a harvest strategy for South Pacific albacore. In 2017, the Commission is expected to adopt a South Pacific albacore TRP, which in order to achieve, will likely require reduction in the total catch. The TRP should address the serious economic conditions facing the fishery. _x000D_ _x000D_ 2) Also for 2017, FFA members are expected t…	_x000D_ _x000D_ Year 1: Some evidence that the Commission is responding to the issue of SP albacore catch rates, e.g. by progressing with the harvest strategy as per the agreed workplan, or some other evidence. (Score: 75) _x000D_ _x000D_ Year 2: Ditto. (Score: 75) _x000D_ _x000D_ Year 3: Ditto (Score: 75) _x000D_ _x000D_ Year 4: Decision-making processes have responded to the albacore catch rate…	Closed	transparent
Bratsk Reservoir perch	Certified	Bratsk Reservoir perch	Default Tree v2.0	3.2.2	Condition 9: Decision Making Process	European Perch - 07, Bratsk Reservoir	Miscellaneous freshwater fishes	Traps - Stationary uncovered pound nets	Bratsk Reservoir perch	Rationale:_x000D_ Some information about the fisheryâ€™s performance and management actions is generally available on request to stakeholders. This was clear during meetings of the assessment team with agencies participating in fishery management. Fishery managers and fishers provided good information to the assessment team. Results of fishing season and effectiveness of management actions undert…	Year 1:_x000D_ Analyse opportunities to publish information and_x000D_ provide data about fishery performance. Consider:_x000D_ web-sites, reports, scientific papers, conference_x000D_ presentations, etc_x000D_ _x000D_ Year 2:_x000D_ Provide information based on Year 1 review._x000D_ Create a public website to provide available_x000D_ information to all stakeholders._x000D_ Provide public informa…	Milestones:_x000D_ Surveillance 1: The Client should consider mechanisms to share public information about fishery performance and provide transparent explanations of how it is used to make fishery decisions. Evidence of considerations will include minutes of meetings, presentations, reports, or actual implementation of information sharing mechanisms. Prepare Year 1 Report describing public infor…	Closed	transparent
[truncated: 634 more rows]
